# Supplementary material for: A convenient access to allylic triflones with allenes and triflyl chloride in the presence of (EtO)2P(O)H
Source: Royal Society of Chemistry journal article supplement (doi:10.1039/c9cc03096d), 2019-01-01

## Supporting Information

### **A Convenient Access to Allylic Triflates with Allenes and Triflyl chloride in the Presence of (EtO)<sub>2</sub>P(O)H**

Jixiang Ni,<sup>a</sup> Yong Jiang, <sup>b</sup> Zhenyu An,<sup>a</sup> Jingfeng Lan,<sup>a</sup> Rulong Yan\*<sup>a</sup>

<sup>a</sup> State Key Laboratory of Applied Organic Chemistry, College of Chemistry and Chemical Engineering, Lanzhou University, Lanzhou, 730000, People's Republic of China.

<sup>b</sup> School of Chemistry and Chemical Engineering, Yangtze Normal University, Chongqing, China.

|                      |         |
|----------------------|---------|
| General remark       | S2      |
| Table S1             | S2-S3   |
| Figure S1, S2        | S3      |
| Experimental Section | S4-S6   |
| The data of products | S6-S21  |
| References           | S21     |
| NMR spectra          | S22-S69 |

## General remark

$^1\text{H}$  NMR, and  $^{13}\text{C}$  NMR spectra were recorded on Bruker 400M and Mercury 300M in  $\text{CDCl}_3$ . All  $^1\text{H}$  NMR and  $^{13}\text{C}$  NMR chemical shifts were given as  $\delta$  value (ppm) with reference to tetramethylsilane (TMS) as an internal standard. All compounds were further characterized by HRMS; copies of their  $^1\text{H}$  NMR and  $^{13}\text{C}$  NMR spectra were provided. Products were purified by flash chromatography on 200–300 mesh silica gels. All melting points were determined without correction. All reactions were carried out under argon atmosphere in oven-dried glassware, unless otherwise noted. Tetrahydrofuran (THF) was distilled prior to use and stored over activated molecular sieves. All reagents were purchased commercially and used as received, unless otherwise noted.

**Table S1. Optimization of reaction conditions <sup>a</sup>**

Reaction scheme: 1a + 2a  $\xrightarrow[\text{Solvent}]{\text{Additive}}$  3aa

| Entry     | Additive (equiv)                    | Solvent        | Temp. (°C)         | Yield (%) <sup>b</sup> |
|-----------|-------------------------------------|----------------|--------------------|------------------------|
| 1         | (EtO) <sub>2</sub> P(O)H (2.0)      | MeCN           | 100/Ar             | 39                     |
| 2         | (EtO) <sub>2</sub> P(O)H (2.0)      | THF            | 100/Ar             | 20                     |
| 3         | (EtO) <sub>2</sub> P(O)H (2.0)      | toluene        | 100/Ar             | 61                     |
| 4         | (EtO) <sub>2</sub> P(O)H (2.0)      | DCE            | 100/Ar             | 5                      |
| 5         | (EtO) <sub>2</sub> P(O)H (2.0)      | DMF            | 100/Ar             | -                      |
| 6         | (EtO) <sub>2</sub> P(O)H (2.0)      | PhCl           | 100/Ar             | 55                     |
| 7         | Ph <sub>3</sub> P (2.0)             | toluene        | 100/Ar             | 10                     |
| 8         | Ph <sub>2</sub> P(O)H (2.0)         | toluene        | 100/Ar             | 12                     |
| 9         | <i>i</i> PrOH (2.0)                 | toluene        | 100/Ar             | -                      |
| 10        | (EtO) <sub>2</sub> P(O)H (2.0)      | toluene        | rt/Ar              | -                      |
| 11        | (EtO) <sub>2</sub> P(O)H (2.0)      | toluene        | 80/Ar              | 45                     |
| 12        | (EtO) <sub>2</sub> P(O)H (2.0)      | toluene        | 120/Ar             | 50                     |
| 13        | (EtO) <sub>2</sub> P(O)H (2.0)      | toluene        | 100/O <sub>2</sub> | -                      |
| <b>14</b> | <b>(EtO)<sub>2</sub>P(O)H (2.0)</b> | <b>toluene</b> | <b>100/air</b>     | <b>75</b>              |
| 15        | (EtO) <sub>2</sub> P(O)H (3.0)      | toluene        | 100/Ar             | 54                     |
| 16        | (EtO) <sub>2</sub> P(O)H (1.0)      | toluene        | 100/Ar             | 43                     |
| 17        | (EtO) <sub>2</sub> P(O)H (0.6)      | toluene        | 100/Ar             | 26                     |

<sup>a</sup> Reaction conditions: **1a** (0.3 mmol), **2a** (0.9 mmol), additive (0.6 mmol), solvent (2 mL). <sup>b</sup> Yields of isolated products. Entry in bold highlights optimized reaction conditions, and the reaction time was monitored by TLC.

## General procedure for the GC-MS experiment

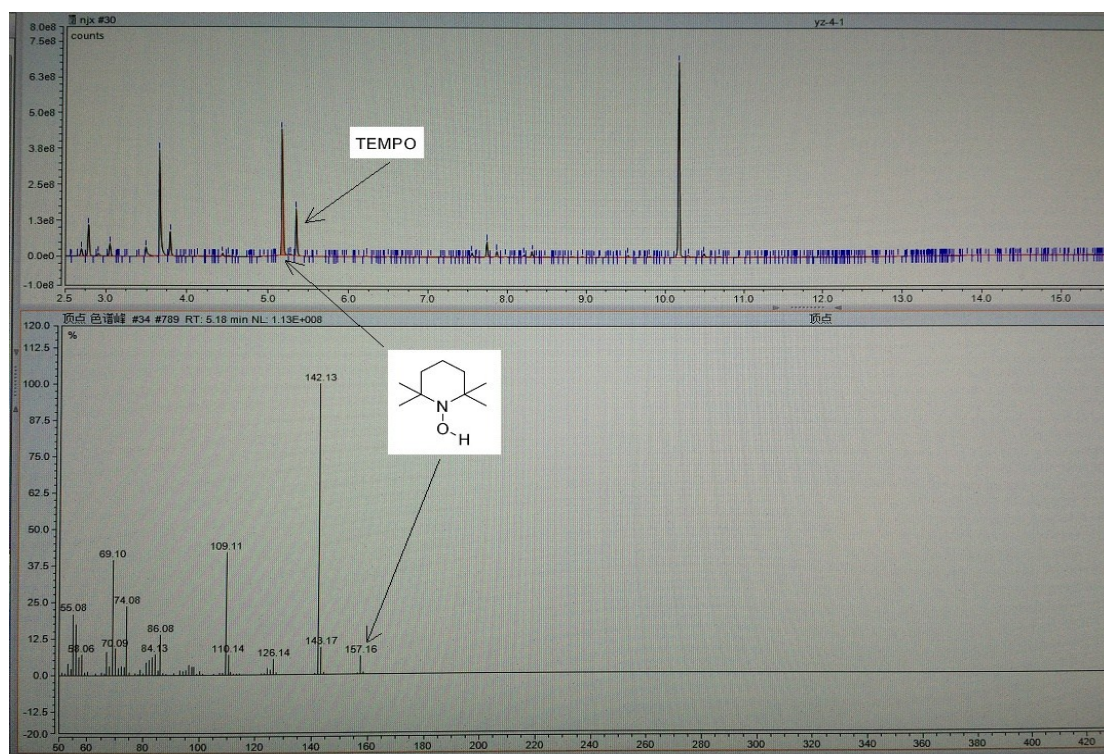

Figure S1

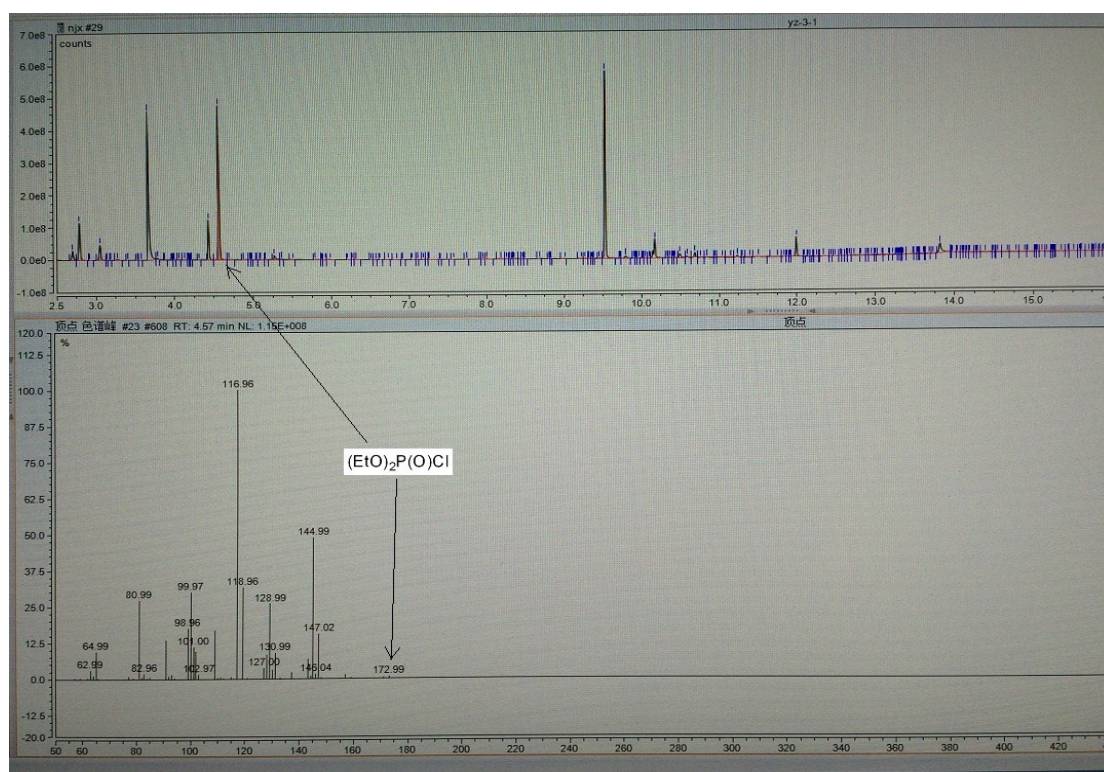

Figure S2



of **III** (10 mmol) in dry THF (20 ml) under nitrogen atmosphere at room temperature. The resulting mixture was allowed to stir at room temperature for an additional 30 minutes. Then the reaction was quenched by saturated  $\text{NH}_4\text{Cl}$  solution (30 ml), and extracted with petroleum ether (30 mL  $\times$  3). The combined organic layers was washed with brine (30 mL  $\times$  3), and dried with anhydrous  $\text{Na}_2\text{SO}_4$ . After removing the solvent under reduced pressure, the crude product was purified by flash column chromatography on silica gel afforded **1a-1y**, **1ab**.

### Typical Procedure for the Cross-Coupling of *N*-Tosylhydrazones and Terminal Alkynes<sup>[4]</sup>

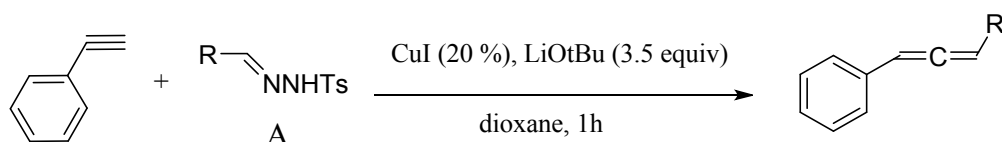

Under a nitrogen atmosphere, ethynylbenzene (1020.0 mg, 10.0 mmol) was added to a mixture of CuI (382.5 mg, 2.0 mmol), LiOtBu (2.8 g, 35.0 mmol), and the *N*-tosylhydrazone A (6.0 g, 22.0 mmol) in 1,4-dioxane (50 mL). The solution was stirred at 90 °C for 1 h, and the progress of the reaction was monitored by TLC. Upon completion of the reaction, the mixture was cooled to room temperature and was filtered through a short silica gel column eluting with EtOAc. The solvent was removed in vacuum to leave a crude mixture, which was purified by column chromatography on silica gel (eluting with petroleum ether) to afford pure **1z** as a colorless oil.

### General procedure for the synthesis of allylic triflones:

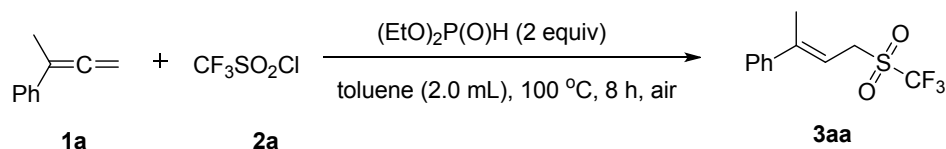

A mixture of buta-2,3-dien-2-ylbenzene **1a** (1 equiv, 0.3 mmol), trifluoromethyl sulfonyl chloride **2a** (3.0 equiv, 0.9 mmol), diethyl phosphate (2.0 equiv, 0.6 mmol), toluene (2 mL) were stirred at 100 °C under air atmosphere for 8 h (TLC monitored).

Upon completion of the reaction, the reaction mixture was cooled to room temperature. The solvent was evaporated in vacuo and the crude product was purified by column chromatography, eluting with petroleum ether/EtOAc (20:1) to afford the desired product (*E*)-(4-((trifluoromethyl)sulfonyl)but-2-en-2-yl)benzene **3aa**.

### The data of products:

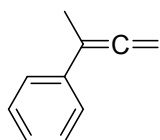

#### buta-2,3-dien-2-ylbenzene (**1a**)<sup>[5-9]</sup>

Yellow oil (702.0 mg, 54% yield). <sup>1</sup>H NMR (400 MHz, CDCl<sub>3</sub>, ppm):  $\delta$  = 7.41-7.39 (d,  $J$  = 8.0 Hz, 2 H), 7.33-7.29 (m, 2 H), 7.21-7.17 (m, 1 H), 5.02-5.00 (m, 2 H), 2.10-2.08 (t,  $J$  = 3.2 Hz, 3 H); <sup>13</sup>C NMR (100 MHz, CDCl<sub>3</sub>, ppm):  $\delta$  = 209.0, 136.7, 128.3, 126.6, 125.7, 99.8, 77.1, 16.7.

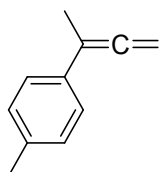

#### 1-(buta-2,3-dien-2-yl)-4-methylbenzene (**1b**)<sup>[5, 8]</sup>

Yellow oil (720.0 mg, 50% yield). <sup>1</sup>H NMR (400 MHz, CDCl<sub>3</sub>, ppm):  $\delta$  = 7.29-7.27 (d,  $J$  = 8.0 Hz, 2 H), 7.13-7.11 (d,  $J$  = 8.0 Hz, 2 H), 5.00-4.97 (m, 2 H), 2.32 (s, 3 H), 2.07-2.06 (t,  $J$  = 3.2 Hz, 3 H); <sup>13</sup>C NMR (100 MHz, CDCl<sub>3</sub>, ppm):  $\delta$  = 208.8, 136.3, 133.7, 129.1, 125.6, 99.6, 76.8, 21.1, 16.8.

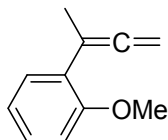

#### 1-(buta-2,3-dien-2-yl)-2-methoxybenzene (**1c**)<sup>[8-11]</sup>

Yellow oil (768.0 mg, 48% yield). <sup>1</sup>H NMR (400 MHz, CDCl<sub>3</sub>, ppm):  $\delta$  = 7.24-7.21 (m, 2 H), 6.95-6.87 (m, 2 H), 4.80-4.78 (m, 2 H), 3.84 (s, 3 H), 2.10-2.08 (t,  $J$  = 3.2 Hz, 3 H); <sup>13</sup>C NMR (100 MHz, CDCl<sub>3</sub>, ppm):  $\delta$  = 209.2, 156.9, 129.2, 128.2, 127.2, 120.7, 111.3, 97.8, 73.6, 55.5, 19.2.

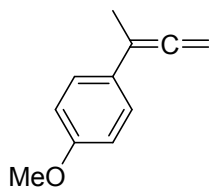

**1-(buta-2,3-dien-2-yl)-4-methoxybenzene (1d)** <sup>[5, 8, 11]</sup>

Yellow oil (816.0 mg, 51% yield). <sup>1</sup>H NMR (400 MHz, CDCl<sub>3</sub>, ppm):  $\delta$  = 7.35-7.32 (d,  $J$  = 8.8 Hz, 2 H), 6.88-6.85 (m, 2 H), 5.01-5.00 (m, 2 H), 3.80 (s, 3 H), 2.08-2.07 (t,  $J$  = 3.2 Hz, 3 H); <sup>13</sup>C NMR (100 MHz, CDCl<sub>3</sub>, ppm):  $\delta$  = 208.6, 158.5, 129.0, 126.8, 113.8, 110.7, 99.3, 76.9, 55.3, 16.9.

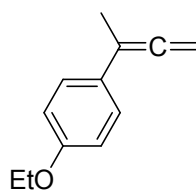

**1-(buta-2,3-dien-2-yl)-4-ethoxybenzene (1e)** <sup>[8]</sup>

Yellow solid (713.4 mg, 41% yield), mp: 49-51 °C. <sup>1</sup>H NMR (400 MHz, CDCl<sub>3</sub>, ppm):  $\delta$  = 7.32-7.29 (m, 2 H), 6.87-6.83 (m, 2 H), 5.00-4.98 (m, 2 H), 4.04-3.99 (m, 2 H), 2.07-2.05 (t,  $J$  = 3.2 Hz, 3 H), 1.42-1.38 (t,  $J$  = 3.2 Hz, 3 H); <sup>13</sup>C NMR (100 MHz, CDCl<sub>3</sub>, ppm):  $\delta$  = 208.6, 157.8, 128.8, 126.7, 114.4, 99.3, 76.8, 63.4, 16.9, 14.9.

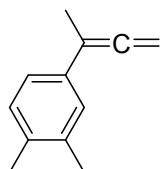

**4-(buta-2,3-dien-2-yl)-1,2-dimethylbenzene (1f)** <sup>[8]</sup>

Yellow oil (695.2 mg, 44% yield). <sup>1</sup>H NMR (400 MHz, CDCl<sub>3</sub>, ppm):  $\delta$  = 7.20 (s, 1 H), 7.17-7.06 (m, 2 H), 5.00-4.98 (m, 2 H), 2.25 (s, 3 H), 2.23 (s, 3 H), 2.07-2.06 (t,  $J$  = 3.2 Hz, 3 H); <sup>13</sup>C NMR (100 MHz, CDCl<sub>3</sub>, ppm):  $\delta$  = 208.8, 136.4, 135.0, 134.2, 129.7, 127.0, 123.1, 99.7, 76.8, 19.9, 19.4, 16.8.

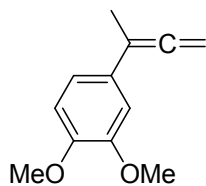

**4-(buta-2,3-dien-2-yl)-1,2-dimethoxybenzene (1g)** <sup>[10]</sup>

Yellow oil (950.0 mg, 50% yield). <sup>1</sup>H NMR (400 MHz, CDCl<sub>3</sub>, ppm):  $\delta$  = 6.98-6.97 (d,  $J$  = 2.0 Hz, 1 H), 6.91-6.89 (d,  $J$  = 8.8 Hz, 1 H), 6.82-6.80 (d,  $J$  = 8.4 Hz, 1 H),

5.02-5.00 (m, 2 H), 3.87 (s, 3 H), 3.85 (s, 3 H), 2.08-2.06 (t,  $J = 3.2$  Hz, 3 H);  $^{13}\text{C}$  NMR (100 MHz,  $\text{CDCl}_3$ , ppm):  $\delta = 208.7, 148.9, 148.2, 129.4, 117.7, 111.0, 109.3, 99.7, 77.1, 55.9, 55.8, 16.9$ .

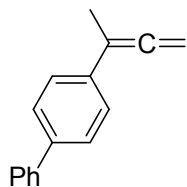

**4-(buta-2,3-dien-2-yl)-1,1'-biphenyl (1h)** <sup>[8]</sup>

white solid (824.0 mg, 40% yield), mp: 84-86 °C.  $^1\text{H}$  NMR (400 MHz,  $\text{CDCl}_3$ , ppm):  $\delta = 7.60-7.55$  (m, 4 H), 7.48-7.40 (m, 4 H), 7.34-7.30 (m, 1 H), 5.06-5.04 (m, 2 H), 2.13-2.11 (t,  $J = 3.2$  Hz, 3 H);  $^{13}\text{C}$  NMR (100 MHz,  $\text{CDCl}_3$ , ppm):  $\delta = 209.2, 140.8, 139.4, 135.8, 128.8, 127.2, 127.1, 127.0, 126.1, 99.6, 77.4, 16.7$ .

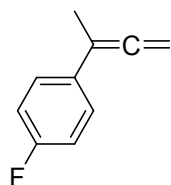

**1-(buta-2,3-dien-2-yl)-4-fluorobenzene (1i)** <sup>[5, 8]</sup>

colorless oil (710.4 mg, 48% yield).  $^1\text{H}$  NMR (400 MHz,  $\text{CDCl}_3$ , ppm):  $\delta = 7.36-7.32$  (m, 2 H), 7.02-6.97 (m, 2 H), 5.01-5.00 (d,  $J = 4.0$  Hz, 2 H), 2.07-2.05 (t,  $J = 3.2$  Hz, 3 H);  $^{13}\text{C}$  NMR (100 MHz,  $\text{CDCl}_3$ , ppm):  $\delta = 208.8$  ( $J = 2$  Hz, 1 C), 163.0 ( $J = 244$  Hz, 1 C), 132.7 ( $J = 3$  Hz, 1 C), 127.2 ( $J = 8$  Hz, 2 C), 115.3 ( $J = 21$  Hz, 2 C), 99.0, 77.4, 16.8.

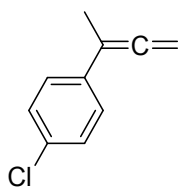

**1-(buta-2,3-dien-2-yl)-4-chlorobenzene (1j)** <sup>[5, 8]</sup>

Yellow oil (623.2 mg, 38% yield).  $^1\text{H}$  NMR (400 MHz,  $\text{CDCl}_3$ , ppm):  $\delta = 7.33-7.25$  (m, 4 H), 5.04-5.02 (m, 2 H), 2.08-2.06 (t,  $J = 3.2$  Hz, 3 H);  $^{13}\text{C}$  NMR (100 MHz,  $\text{CDCl}_3$ , ppm):  $\delta = 208.9, 135.2, 132.2, 128.4, 126.9, 99.0, 77.3, 16.6$ .



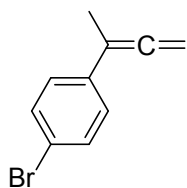

**1-bromo-4-(buta-2,3-dien-2-yl)benzene (1k)** [5, 8-9, 11]

Yellow solid (728.0 mg, 35% yield), mp: 54-56 °C. <sup>1</sup>H NMR (400 MHz, CDCl<sub>3</sub>, ppm):  $\delta$  = 7.45-7.42 (d,  $J$  = 8.8 Hz, 2 H), 7.28-7.26 (d,  $J$  = 8.8 Hz, 2 H), 5.04-5.02 (m, 2 H), 2.08-2.06 (t,  $J$  = 3.2 Hz, 3 H); <sup>13</sup>C NMR (100 MHz, CDCl<sub>3</sub>, ppm):  $\delta$  = 208.9, 135.8, 131.3, 127.3, 120.4, 99.1, 77.4, 16.6.

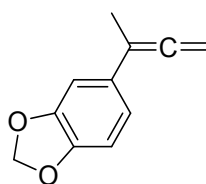

**5-(buta-2,3-dien-2-yl)benzo[d][1,3]dioxole (1l)** [5]

Yellow oil (1131.0 mg, 65% yield). <sup>1</sup>H NMR (400 MHz, CDCl<sub>3</sub>, ppm):  $\delta$  = 6.99-6.93 (m, 1 H), 6.83-6.74 (m, 2 H), 5.96-5.90 (m, 2 H), 5.05-4.98 (m, 2 H), 2.04-2.03 (t,  $J$  = 3.2 Hz, 3 H); <sup>13</sup>C NMR (100 MHz, CDCl<sub>3</sub>, ppm):  $\delta$  = 208.6, 147.8, 146.4, 130.8, 118.7, 108.0, 106.4, 101.0, 99.6, 77.0, 17.0.

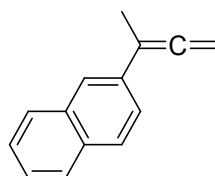

**2-(buta-2,3-dien-2-yl)naphthalene (1m)** [5, 6, 8, 9, 11, 13]

Yellow solid (918.0 mg, 51% yield), mp: 59-61 °C. <sup>1</sup>H NMR (400 MHz, CDCl<sub>3</sub>, ppm):  $\delta$  = 7.82-7.78 (m, 2 H), 7.77-7.72 (m, 2 H), 7.65-7.63 (m, 1 H), 7.48-7.40 (m, 2 H), 5.12-5.10 (m, 2 H), 2.22-2.21 (t,  $J$  = 3.2 Hz, 3 H); <sup>13</sup>C NMR (100 MHz, CDCl<sub>3</sub>, ppm):  $\delta$  = 209.7, 134.1, 133.6, 132.3, 128.0, 127.7, 127.6, 126.1, 125.6, 124.9, 123.3, 100.1, 77.3, 16.8.

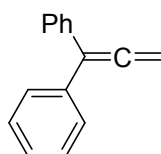

**propa-1,2-diene-1,1-diyl dibenzene (1n)** [6-9, 13]

Yellow oil (1152.0 mg, 60% yield). <sup>1</sup>H NMR (400 MHz, CDCl<sub>3</sub>, ppm):  $\delta$  = 7.38-7.32

(m, 8 H), 7.29-7.25 (m, 2 H), 5.26 (s, 2 H);  $^{13}\text{C}$  NMR (100 MHz,  $\text{CDCl}_3$ , ppm):  $\delta$  = 209.9, 136.3, 128.5, 127.3, 109.2, 78.1.

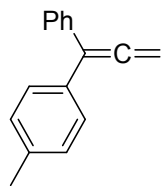

**1-methyl-4-(1-phenylpropa-1,2-dien-1-yl)benzene (1o)** <sup>[5, 6, 8]</sup>

Yellow oil (1071.2 mg, 52% yield).  $^1\text{H}$  NMR (300 MHz,  $\text{CDCl}_3$ , ppm):  $\delta$  = 7.38-7.31 (m, 4 H), 7.27-7.24 (m, 3 H), 7.17-7.14 (m, 2 H), 5.24 (s, 2 H), 2.36 (s, 3 H);  $^{13}\text{C}$  NMR (75 MHz,  $\text{CDCl}_3$ , ppm):  $\delta$  = 209.7, 137.0, 136.3, 133.2, 129.1, 128.4, 128.3, 127.1, 108.9, 78.0, 21.2.

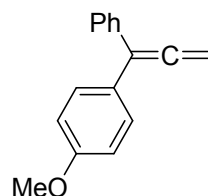

**1-methoxy-4-(1-phenylpropa-1,2-dien-1-yl)benzene (1p)** <sup>[7, 12]</sup>

Yellow solid (1021.2 mg, 46% yield), mp: 90-91 °C.  $^1\text{H}$  NMR (400 MHz,  $\text{CDCl}_3$ , ppm):  $\delta$  = 7.40-7.34 (m, 4 H), 7.32-7.27 (m, 3 H), 6.92-6.88 (m, 2 H), 5.26 (s, 2 H), 3.83 (s, 3 H);  $^{13}\text{C}$  NMR (100 MHz,  $\text{CDCl}_3$ , ppm):  $\delta$  = 209.6, 158.9, 136.5, 129.5, 128.3, 127.1, 113.8, 108.6, 77.9, 55.3.

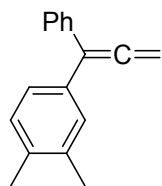

**1,2-dimethyl-4-(1-phenylpropa-1,2-dien-1-yl)benzene (1q)** <sup>[7, 8]</sup>

Yellow solid (990.0 mg, 45% yield), mp: 94-96 °C.  $^1\text{H}$  NMR (300 MHz,  $\text{CDCl}_3$ , ppm):  $\delta$  = 7.39-7.31 (m, 4 H), 7.29-7.26 (m, 1 H), 7.14-7.13 (m, 1 H), 7.11-7.05 (m, 2 H), 5.24 (s, 2 H), 2.27 (s, 3 H), 2.25 (s, 3 H);  $^{13}\text{C}$  NMR (75 MHz,  $\text{CDCl}_3$ , ppm):  $\delta$  = 209.7, 136.6, 136.4, 135.7, 133.6, 129.7, 129.5, 128.4, 128.3, 127.1, 125.8, 108.9, 77.8, 19.8, 19.5.

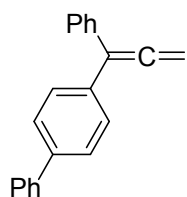

**4-(1-phenylpropa-1,2-dien-1-yl)-1,1'-biphenyl (1r)** <sup>[7]</sup>

Yellow solid (964.8 mg, 36% yield), mp: 99-101 °C. <sup>1</sup>H NMR (300 MHz, CDCl<sub>3</sub>, ppm): δ = 7.58-7.54 (m, 4 H), 7.43-7.34 (m, 10 H), 5.26 (s, 2 H); <sup>13</sup>C NMR (75 MHz, CDCl<sub>3</sub>, ppm): δ = 209.9, 140.6, 140.0, 136.1, 135.1, 128.7, 128.4, 127.3, 127.1, 127.0, 108.9, 77.4.

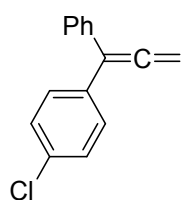

**1-chloro-4-(1-phenylpropa-1,2-dienyl)benzene (1s)** <sup>[6-8, 19]</sup>

Yellow solid (904.0 mg, 40% yield), mp: 115-117 °C. <sup>1</sup>H NMR (400 MHz, CDCl<sub>3</sub>, ppm): δ = 7.36-7.22 (m, 9 H), 5.26 (s, 2 H); <sup>13</sup>C NMR (100 MHz, CDCl<sub>3</sub>, ppm): δ = 209.8, 135.9, 134.9, 133.0, 129.7, 128.6, 128.5, 128.4, 127.5, 108.4, 78.5.

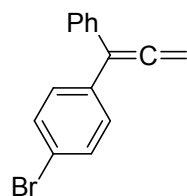

**1-bromo-4-(1-phenylpropa-1,2-dien-1-yl)benzene (1t)** <sup>[20]</sup>

Yellow solid (1053.0 mg, 39% yield), mp: 110-112 °C. <sup>1</sup>H NMR (400 MHz, CDCl<sub>3</sub>, ppm): δ = 7.46-7.44 (d, *J* = 8.4 Hz, 2 H), 7.35-7.31 (m, 4 H), 7.30-7.28 (m, 1 H), 7.23-7.21 (m, *J* = 8.4 Hz, 2H), 5.26 (s, 2 H); <sup>13</sup>C NMR (100 MHz, CDCl<sub>3</sub>, ppm): δ = 209.7, 135.7, 135.3, 131.5, 130.0, 128.5, 128.3, 127.4, 121.1, 108.4, 78.5.

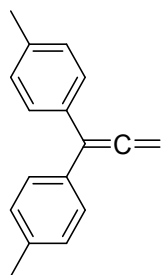

**4,4'-(propa-1,2-diene-1,1-diyl)bis(methylbenzene) (1u)** <sup>[7, 21]</sup>

Colorless solid (1320.0 mg, 60% yield), mp: 92-94 °C. <sup>1</sup>H NMR (400 MHz, CDCl<sub>3</sub>,

ppm):  $\delta = 7.26-7.24$  (d,  $J = 8.0$  Hz, 4 H),  $7.15-7.13$  (d,  $J = 8.0$  Hz, 4 H),  $5.21$  (s, 2 H),  $2.34$  (s, 6 H);  $^{13}\text{C}$  NMR (100 MHz,  $\text{CDCl}_3$ , ppm):  $\delta = 209.6$ ,  $136.9$ ,  $133.4$ ,  $129.1$ ,  $128.3$ ,  $108.8$ ,  $77.8$ ,  $21.1$ .

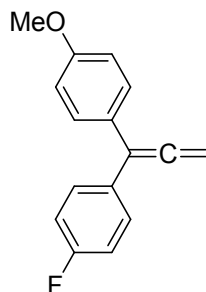

**1-fluoro-4-(1-(4-methoxyphenyl)propa-1,2-dien-1-yl)benzene (1v)**

Yellow solid (1608.0 mg, 67% yield), mp:  $97-98$  °C.  $^1\text{H}$  NMR (400 MHz,  $\text{CDCl}_3$ , ppm):  $\delta = 7.33-7.30$  (m, 2 H),  $7.27-7.23$  (m, 2 H),  $7.05-7.00$  (m, 2 H),  $6.90-6.88$  (m, 2 H),  $5.23$  (s, 2 H),  $3.81$  (s, 3 H);  $^{13}\text{C}$  NMR (100 MHz,  $\text{CDCl}_3$ , ppm):  $\delta = 209.5$ ,  $163.2-160.8$  (d,  $J = 245.0$  Hz, 1C),  $159.0$ ,  $132.5-132.4$  (d,  $J = 3.0$  Hz, 1C),  $130.0-129.8$  (d,  $J = 8.0$  Hz, 1C),  $128.2$ ,  $115.4-115.1$  (d,  $J = 84.0$  Hz, 1C),  $113.9$ ,  $107.8$ ,  $78.1$ ,  $55.3$ .  $\text{C}_{16}\text{H}_{14}\text{FO}$   $[\text{M}+\text{H}]^+$   $241.1023$ ; found:  $241.1026$ .

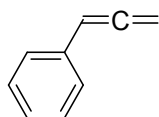

**propa-1,2-dien-1-ylbenzene (1w) <sup>[13]</sup>**

Yellow oil (777.2 mg, 67% yield).  $^1\text{H}$  NMR (400 MHz,  $\text{CDCl}_3$ , ppm):  $\delta = 7.33-7.30$  (m, 4 H),  $7.23-7.17$  (m, 1 H),  $6.18-6.15$  (t,  $J = 6.8$  Hz, 1 H),  $5.15-5.14$  (d,  $J = 6.8$  Hz, 2H);  $^{13}\text{C}$  NMR (100 MHz,  $\text{CDCl}_3$ , ppm):  $\delta = 209.8$ ,  $139.9$ ,  $128.6$ ,  $126.9$ ,  $126.7$ ,  $94.0$ ,  $78.9$ .

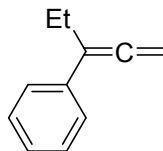

**penta-1,2-dien-3-ylbenzene (1x) <sup>[5, 6, 8, 14]</sup>**

Yellow oil (878.4 mg, 61% yield).  $^1\text{H}$  NMR (400 MHz,  $\text{CDCl}_3$ , ppm):  $\delta = 7.42-7.40$  (d,  $J = 7.6$  Hz, 2 H),  $7.33-7.29$  (m, 2 H),  $7.25-7.17$  (m, 1 H),  $5.10-5.09$  (t,  $J = 3.6$  Hz, 2 H),  $2.46-2.39$  (m, 2 H),  $1.17-1.13$  (t,  $J = 3.2$  Hz, 3 H);  $^{13}\text{C}$  NMR (100 MHz,  $\text{CDCl}_3$ , ppm):  $\delta = 208.4$ ,  $136.6$ ,  $128.4$ ,  $126.6$ ,  $125.9$ ,  $106.7$ ,  $78.8$ ,  $22.4$ ,  $12.5$ .

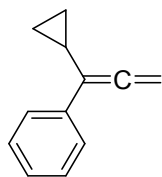

**(1-cyclopropylpropa-1,2-dien-1-yl)benzene (1y)** [5, 8, 15, 16]

Yellow oil (546.0 mg, 35% yield). <sup>1</sup>H NMR (400 MHz, CDCl<sub>3</sub>, ppm): δ = 7.59-7.57 (m, 2 H), 7.35-7.32 (m, 2 H), 7.23-7.19 (m, 1 H), 5.10-5.09 (d, *J* = 2.8 Hz, 2 H), 1.60-1.52 (m, 1 H), 0.89-0.85 (m, 2 H), 0.57-0.53 (m, 2 H); <sup>13</sup>C NMR (100 MHz, CDCl<sub>3</sub>, ppm): δ = 207.9, 136.8, 128.3, 126.8, 126.2, 108.3, 79.3, 10.4, 6.9.

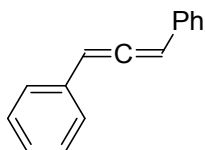

**1,3-diphenylpropa-1,2-diene (1z)** [8, 13, 17]

colorless oil (960.0 mg, 50% yield). <sup>1</sup>H NMR (300 MHz, CDCl<sub>3</sub>, ppm): δ = 7.12-7.37 (m, 10 H), 6.60 (s, 2 H); <sup>13</sup>C NMR (75 MHz, CDCl<sub>3</sub>, ppm): δ = 207.8, 133.6, 128.7, 127.3, 127.0, 98.4.

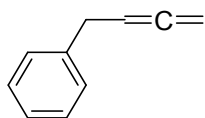

**buta-2,3-dien-1-ylbenzene (1ab)** [18-21]

colorless oil (650.0 mg, 50% yield). <sup>1</sup>H NMR (400 MHz, CDCl<sub>3</sub>, ppm): δ = 7.42-7.21 (m, 5 H), 5.33 (m, 1 H), 4.76 (m, 2 H), 3.41 (m, 2 H); <sup>13</sup>C NMR (75 MHz, CDCl<sub>3</sub>, ppm): δ = 209.4, 140.7, 128.9, 128.8, 126.6, 90.0, 75.5, 35.5.

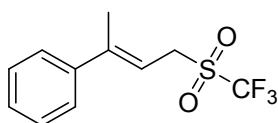

**(E)-(4-((trifluoromethyl)sulfonyl)but-2-en-2-yl)benzene (3aa)**

Yellow solid (59.4 mg, 75% yield), mp: 35-37 °C. <sup>1</sup>H NMR (400 MHz, CDCl<sub>3</sub>, ppm): δ = 7.42-7.31 (m, 5 H), 5.78-5.74 (m, 1 H), 4.20-4.18 (d, *J* = 8.0 Hz, 2 H), 2.19 (s, 3 H); <sup>13</sup>C NMR (100 MHz, CDCl<sub>3</sub>, ppm): δ = 147.9, 141.6, 128.5, 128.4, 126.0, 119.7 (q, *J* = 327.0 Hz, 1C), 108.0, 50.7, 16.9; HRMS calcd for C<sub>11</sub>H<sub>12</sub>F<sub>3</sub>O<sub>2</sub>S [M+H]<sup>+</sup> 265.0505; found: 265.0511.

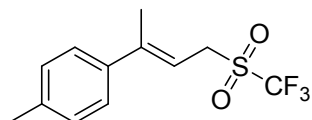

**(E)-1-methyl-4-(4-((trifluoromethyl)sulfonyl)but-2-en-2-yl)benzene (3ba)**

Yellow solid (59.2 mg, 71% yield), mp: 48-50 °C. <sup>1</sup>H NMR (400 MHz, CDCl<sub>3</sub>, ppm): δ = 7.32-7.30 (d, *J* = 8.0 Hz, 2 H), 7.18-7.16 (d, *J* = 8.0 Hz, 2 H), 5.76-5.72 (m, 1 H), 4.19-4.17 (d, *J* = 8.0 Hz, 2 H), 2.36 (s, 3 H), 2.17 (s, 3 H); <sup>13</sup>C NMR (100 MHz, CDCl<sub>3</sub>, ppm): δ = 147.7, 138.7, 138.5, 129.2, 125.9, 119.7 (q, *J* = 327.0 Hz, 1C), 107.1, 50.8, 21.1, 16.9; HRMS calcd for C<sub>12</sub>H<sub>14</sub>F<sub>3</sub>O<sub>2</sub>S [M+H]<sup>+</sup> 279.0661; found: 279.0653.

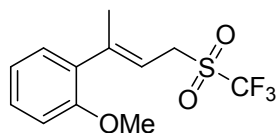

**(E)-1-methoxy-2-(4-((trifluoromethyl)sulfonyl)but-2-en-2-yl)benzene (3ca)**

Yellow oil (37.9 mg, 43% yield). <sup>1</sup>H NMR (400 MHz, CDCl<sub>3</sub>, ppm): δ = 7.31-7.27 (m, 1 H), 7.14-7.11 (m, 1 H), 6.95-6.88 (m, 2 H), 5.55-5.51 (m, 1 H), 4.17-4.15 (d, *J* = 8.0 Hz, 2 H), 3.81 (s, 3 H), 2.12 (s, 3 H); <sup>13</sup>C NMR (100 MHz, CDCl<sub>3</sub>, ppm): δ = 156.3, 148.1, 132.3, 129.3, 129.2, 120.7, 119.7 (q, *J* = 326.0 Hz, 1C), 110.9, 110.1, 55.4, 50.5, 17.9; HRMS calcd for C<sub>12</sub>H<sub>14</sub>F<sub>3</sub>O<sub>3</sub>S [M+H]<sup>+</sup> 295.0574; found: 295.0580.

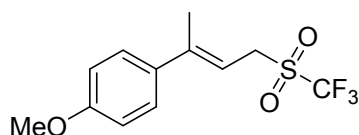

**(E)-1-methoxy-4-(4-((trifluoromethyl)sulfonyl)but-2-en-2-yl)benzene (3da)**

Yellow solid (70.6 mg, 80% yield), mp: 76-78 °C. <sup>1</sup>H NMR (300 MHz, CDCl<sub>3</sub>, ppm): δ = 7.39-7.34 (m, 2 H), 6.90-6.87 (m, 2 H), 5.72-5.67 (m, 1 H), 4.20-4.17 (m, 2 H), 3.82 (s, 3 H), 2.16 (s, 3 H); <sup>13</sup>C NMR (75 MHz, CDCl<sub>3</sub>, ppm): δ = 159.9, 147.2, 133.9, 127.2, 119.7 (q, *J* = 326.3 Hz, 1C), 113.8, 106.1, 55.3, 50.8, 16.8; HRMS calcd for C<sub>12</sub>H<sub>14</sub>F<sub>3</sub>O<sub>3</sub>S [M+H]<sup>+</sup> 295.0574; found: 295.0570.

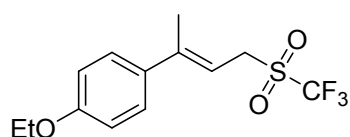

**(E)-1-ethoxy-4-(4-((trifluoromethyl)sulfonyl)but-2-en-2-yl)benzene (3ea)**

Yellow solid (64.7 mg, 70% yield), mp: 70-72 °C. <sup>1</sup>H NMR (400 MHz, CDCl<sub>3</sub>, ppm): δ = 7.37-7.33 (m, 2 H), 6.90-6.85 (m, 2 H), 5.71-5.67 (m, 1 H), 4.19-4.17 (d, *J* = 8.0 Hz, 2 H), 4.07-4.02 (m, 2 H), 2.16 (s, 3 H), 1.44-1.40 (m, 3 H); <sup>13</sup>C NMR (100 MHz, CDCl<sub>3</sub>, ppm): δ = 159.3, 147.2, 133.8, 127.2, 119.8 (q, *J* = 327.0 Hz, 1C), 114.4, 106.0, 63.5, 50.8, 16.8, 14.8; HRMS calcd for C<sub>13</sub>H<sub>16</sub>F<sub>3</sub>O<sub>3</sub>S [M+H]<sup>+</sup> 309.0767; found: 309.0770.

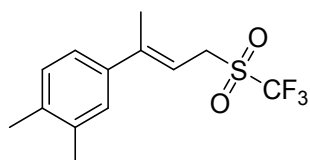

**(*E*)-1,2-dimethyl-4-(4-((trifluoromethyl)sulfonyl)but-2-en-2-yl)benzene (3fa)**

Yellow solid (63.1 mg, 72% yield), mp: 50-52 °C. <sup>1</sup>H NMR (400 MHz, CDCl<sub>3</sub>, ppm): δ = 7.18 (s, 1 H), 7.16-7.10 (m, 2 H), 5.75-5.71 (m, 1 H), 4.19-4.17 (d, *J* = 8.0 Hz, 2 H), 2.28 (s, 3 H), 2.27 (s, 3 H), 2.16 (s, 3 H); <sup>13</sup>C NMR (100 MHz, CDCl<sub>3</sub>, ppm): δ = 147.8, 139.2, 137.2, 136.7, 129.7, 127.3, 123.5, 119.8 (q, *J* = 327.0 Hz, 1C), 106.9, 50.8, 19.9, 19.5, 16.9; HRMS calcd for C<sub>13</sub>H<sub>16</sub>F<sub>3</sub>O<sub>2</sub>S [M+H]<sup>+</sup> 293.0818; found: 293.0825.

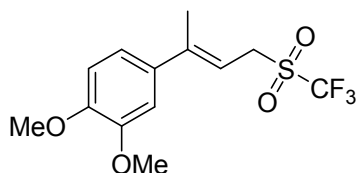

**(*E*)-1,2-dimethoxy-4-(4-((trifluoromethyl)sulfonyl)but-2-en-2-yl)benzene (3ga)**

Yellow oil (58.3 mg, 60% yield). <sup>1</sup>H NMR (400 MHz, CDCl<sub>3</sub>, ppm): δ = 7.01-6.98 (m, 1 H), 6.93-6.92 (d, *J* = 2.0 Hz, 1 H), 6.86-6.84 (d, *J* = 8.8 Hz, 1 H), 5.73-5.69 (t, *J* = 7.6 Hz, 1 H), 4.20-4.18 (d, *J* = 8.0 Hz, 2 H), 3.91 (s, 3 H), 3.90 (s, 3 H), 2.18 (s, 3 H); <sup>13</sup>C NMR (100 MHz, CDCl<sub>3</sub>, ppm): δ = 149.6, 148.9, 147.6, 134.4, 119.8 (q, *J* = 326.0 Hz, 1C), 118.8, 111.0, 109.3, 106.4, 56.0, 50.8, 17.1; HRMS calcd for C<sub>13</sub>H<sub>16</sub>F<sub>3</sub>O<sub>4</sub>S [M+H]<sup>+</sup> 325.0716; found: 325.0720.

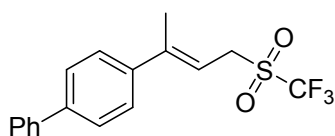

**(*E*)-4-(4-((trifluoromethyl)sulfonyl)but-2-en-2-yl)-1,1'-biphenyl (3ha)**

Yellow solid (74.5 mg, 73% yield), mp: 136-139 °C. <sup>1</sup>H NMR (400 MHz, CDCl<sub>3</sub>,

ppm):  $\delta = 7.61-7.58$  (m, 4 H),  $7.50-7.43$  (m, 4 H),  $7.38-7.34$  (m, 1 H),  $5.85-5.81$  (m, 1 H),  $4.23-4.21$  (d,  $J = 8.0$  Hz, 2 H),  $2.22$  (s, 3 H);  $^{13}\text{C}$  NMR (100 MHz,  $\text{CDCl}_3$ , ppm):  $\delta = 147.4, 141.4, 140.4, 140.3, 128.9, 127.6, 127.2, 127.0, 126.5, 119.8$  (q,  $J = 326.0$  Hz, 1C),  $107.9, 50.8, 16.9$ ; HRMS calcd for  $\text{C}_{17}\text{H}_{16}\text{F}_3\text{O}_2\text{S}$   $[\text{M}+\text{H}]^+$  341.0818; found: 341.0824.

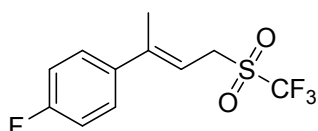

**(E)-1-fluoro-4-(4-((trifluoromethyl)sulfonyl)but-2-en-2-yl)benzene (3ia)**

Yellow solid (42.3 mg, 50% yield), mp: 40-42 °C.  $^1\text{H}$  NMR (400 MHz,  $\text{CDCl}_3$ , ppm):  $\delta = 7.41-7.36$  (m, 2 H),  $7.08-7.02$  (m, 2 H),  $5.74-5.70$  (m, 1 H),  $4.20-4.18$  (d,  $J = 8.0$  Hz, 2 H),  $2.18$  (s, 3 H);  $^{13}\text{C}$  NMR (100 MHz,  $\text{CDCl}_3$ , ppm):  $\delta = 146.9, 137.6-137.5$  (d,  $J = 4.0$  Hz, 1C),  $127.8-127.7$  (d,  $J = 8.0$  Hz, 1C),  $119.6$  (q,  $J = 327.0$  Hz, 1C),  $115.5-115.3$  (d,  $J = 21.0$  Hz, 1C),  $107.9, 50.5, 17.1$ ; HRMS calcd for  $\text{C}_{11}\text{H}_{11}\text{F}_4\text{O}_2\text{S}$   $[\text{M}+\text{H}]^+$  283.0411; found: 283.0408.

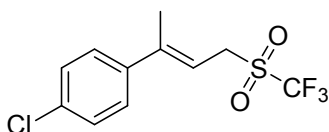

**(E)-1-chloro-4-(4-((trifluoromethyl)sulfonyl)but-2-en-2-yl)benzene (3ja)**

Yellow solid (38.4 mg, 43% yield), mp: 34-36 °C.  $^1\text{H}$  NMR (400 MHz,  $\text{CDCl}_3$ , ppm):  $\delta = 7.34$  (s, 4 H),  $5.77-5.73$  (m, 1 H),  $4.19-4.17$  (d,  $J = 8.0$  Hz, 2 H),  $2.17$  (s, 3 H);  $^{13}\text{C}$  NMR (100 MHz,  $\text{CDCl}_3$ , ppm):  $\delta = 146.8, 140.0, 134.5, 128.7, 127.4, 119.7$  (q,  $J = 327.0$  Hz, 1C),  $108.6, 50.6, 16.9$ ; HRMS calcd for  $\text{C}_{11}\text{H}_{11}\text{ClF}_3\text{O}_2\text{S}$   $[\text{M}+\text{H}]^+$  299.0115; found: 299.0120.

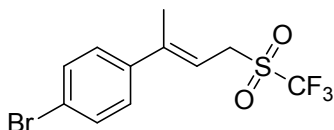

**(E)-1-bromo-4-(4-((trifluoromethyl)sulfonyl)but-2-en-2-yl)benzene (3ka)**

Yellow solid (41.0 mg, 40% yield), mp: 28-30 °C.  $^1\text{H}$  NMR (300 MHz,  $\text{CDCl}_3$ , ppm):  $\delta = 7.51-7.48$  (d,  $J = 8.4$  Hz, 2 H),  $7.30-7.27$  (m, 8.7 Hz, 2 H),  $5.79-5.73$  (m, 1 H),  $4.21-4.18$  (d,  $J = 8.1$  Hz, 2 H),  $2.18$  (s, 3 H);  $^{13}\text{C}$  NMR (75 MHz,  $\text{CDCl}_3$ , ppm):  $\delta = 140.3, 131.6, 127.6, 122.6, 108.5, 50.5, 16.9$ ; HRMS calcd for  $\text{C}_{11}\text{H}_{11}\text{BrF}_3\text{O}_2\text{S}$



[M+H]<sup>+</sup> 342.9610; found: 342.9617.

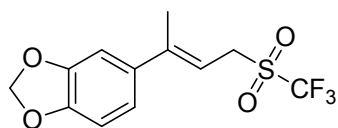

**(E)-5-(4-((trifluoromethyl)sulfonyl)but-2-en-2-yl)benzo[d][1,3]dioxole (3la)**

Yellow oil (48.0 mg, 52% yield). <sup>1</sup>H NMR (400 MHz, CDCl<sub>3</sub>, ppm): δ = 6.91-6.89 (m, 2 H), 6.80-6.77 (m, 1 H), 5.97 (s, 2 H), 5.69-5.65 (t, *J* = 8.0 Hz, 1 H), 4.18-4.16 (d, *J* = 8.0 Hz, 2 H), 2.14 (s, 3 H); <sup>13</sup>C NMR (100 MHz, CDCl<sub>3</sub>, ppm): δ = 147.8, 147.3, 135.8, 119.9, 119.7 (q, *J* = 326.0 Hz, 1C), 108.1, 106.8, 106.5, 101.3, 100.8, 50.7, 17.0; HRMS calcd for C<sub>12</sub>H<sub>12</sub>F<sub>3</sub>O<sub>4</sub>S [M+H]<sup>+</sup> 309.0403; found: 309.0400

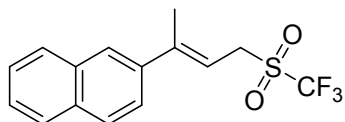

**(E)-2-(4-((trifluoromethyl)sulfonyl)but-2-en-2-yl)naphthalene (3ma)**

Yellow solid (52.8 mg, 56% yield), mp: 98-100 °C. <sup>1</sup>H NMR (400 MHz, CDCl<sub>3</sub>, ppm): δ = 7.87-7.81 (m, 4 H), 7.56-7.53 (m, 1 H), 7.52-7.47 (m, 2 H), 5.93-5.89 (m, 1 H), 4.26-4.24 (d, *J* = 8.0 Hz, 2 H), 2.30 (s, 3 H); <sup>13</sup>C NMR (100 MHz, CDCl<sub>3</sub>, ppm): δ = 147.7, 138.8, 133.2, 128.3, 128.2, 127.6, 126.5, 126.4, 125.2, 123.9, 119.8 (q, *J* = 327.0 Hz, 1C), 108.4, 50.8, 16.9; HRMS calcd for C<sub>15</sub>H<sub>14</sub>F<sub>3</sub>O<sub>2</sub>S [M+H]<sup>+</sup> 315.0661; found: 315.0669.

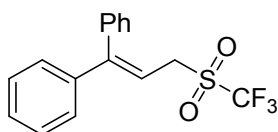

**(E)-3-((trifluoromethyl)sulfonyl)prop-1-ene-1,1-diyl)dibenzene (3na)**

Yellow oil (79.2 mg, 81% yield). <sup>1</sup>H NMR (400 MHz, CDCl<sub>3</sub>, ppm): δ = 7.46-7.41 (m, 3 H), 7.34-7.31 (m, 3 H), 7.28-7.24 (m, 2 H), 7.23-7.20 (m, 2 H), 6.14-6.10 (m, 1 H), 4.11-4.09 (d, *J* = 7.6 Hz, 2 H); <sup>13</sup>C NMR (100 MHz, CDCl<sub>3</sub>, ppm): δ = 152.6, 140.3, 137.3, 129.4, 128.8, 128.7, 128.5, 128.4, 127.7, 108.9, 51.8; HRMS calcd for C<sub>16</sub>H<sub>14</sub>F<sub>3</sub>O<sub>2</sub>S [M+H]<sup>+</sup> 327.0661; found: 327.0655.

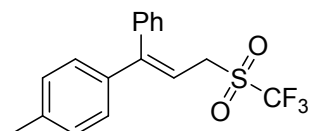

**(*E/Z*)-1-methyl-4-(1-phenyl-3-((trifluoromethyl)sulfonyl)prop-1-en-1-yl)benzene (30a)**

Colorless oil (71.4 mg, 70% yield). (*E/Z* = 61/39) <sup>1</sup>H NMR (400 MHz, CDCl<sub>3</sub>, ppm): δ = 7.45-7.09 (m, 9 H, Ar), 6.10-6.06 (m, 1 H), 4.09-4.07 (d, *J* = 8.0 Hz, 2 H), 2.35 (s, 3 H); δ = 7.45-7.09 (m, 9 H, Ar), 6.10-6.06 (m, 1 H), 4.13-4.11 (d, *J* = 8.0 Hz, 2 H), 2.40 (s, 3 H); <sup>13</sup>C NMR (100 MHz, CDCl<sub>3</sub>, ppm): δ = 152.7, 152.5, 140.6, 138.9, 138.4, 137.5, 137.4, 134.3, 129.5, 129.4, 129.3, 129.1, 128.7, 128.4, 128.3, 127.7, 127.6, 119.5 (q, *J* = 326.0 Hz, 1C), 108.9, 107.9, 51.9, 21.3, 21.2; HRMS calcd for C<sub>17</sub>H<sub>16</sub>F<sub>3</sub>O<sub>2</sub>S [M+H]<sup>+</sup> 341.0818; found: 341.0822.

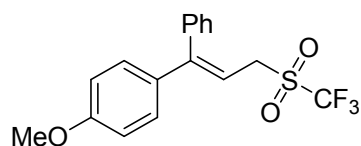

**(*E/Z*)-1-methoxy-4-(1-phenyl-3-((trifluoromethyl)sulfonyl)prop-1-en-1-yl)benzene (3pa)**

Colorless oil (65.1 mg, 61% yield). (*E/Z* = 72/28) <sup>1</sup>H NMR (400 MHz, CDCl<sub>3</sub>, ppm): δ = 7.45-6.82 (m, 9 H, Ar), 6.07-6.01 (m, 1 H), 4.08-4.06 (d, *J* = 8.0 Hz, 2H), 3.80 (s, 3H); 7.45-6.82 (m, 9 H, Ar), 6.07-6.01 (m, 1 H), 4.15-4.13 (d, *J* = 8.0 Hz, 2H), 3.85 (s, 3H); <sup>13</sup>C NMR (100 MHz, CDCl<sub>3</sub>, ppm): δ = 160.1, 159.7, 152.5, 152.1, 140.8, 137.5, 132.8, 130.8, 129.5, 129.4, 129.0, 128.7, 128.4, 128.3, 127.8, 119.5 (q, *J* = 327.0 Hz, 1C), 114.1, 113.7, 108.4, 106.7, 55.3, 51.9; HRMS calcd for C<sub>17</sub>H<sub>16</sub>F<sub>3</sub>O<sub>3</sub>S [M+H]<sup>+</sup> 357.0767; found: 357.0759.

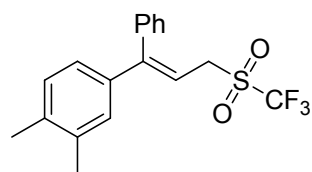

**(*E/Z*)-1,2-dimethyl-4-(1-phenyl-3-((trifluoromethyl)sulfonyl)prop-1-en-1-yl)benzene (3qa)**

Colorless oil (66.9 mg, 63% yield). (*E/Z* = 65/35) <sup>1</sup>H NMR (300 MHz, CDCl<sub>3</sub>, ppm): δ = 7.45-6.93 (m, 8 H, Ar), 6.09-6.04 (m, 1 H), 4.09-4.07 (d, *J* = 8.0 Hz, 2H), 2.25 (s, 3H), 2.22 (s, 3H); 7.45-6.93 (m, 8 H, Ar), 6.09-6.04 (m, 1 H), 4.14-4.12 (d, *J* = 7.6 Hz, 2H), 2.30 (s, 3H), 2.27 (s, 3H); <sup>13</sup>C NMR (100 MHz, CDCl<sub>3</sub>, ppm): δ = 152.7, 152.6, 140.6, 137.9, 137.6, 137.5, 137.1, 137.0, 136.7, 134.7, 130.4, 129.9, 129.6, 129.4,

128.7, 128.6, 128.4, 128.3, 127.7, 126.8, 126.8, 125.2, 119.5 (q,  $J = 326.0$  Hz, 1C), 108.5, 107.7, 52.0, 51.8, 19.8, 19.7, 19.6, 19.5; HRMS calcd for  $C_{18}H_{18}F_3O_2S$   $[M+H]^+$  355.0974; found: 355.0982.

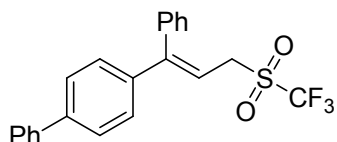

**(*E/Z*)-4-(1-phenyl-3-((trifluoromethyl)sulfonyl)prop-1-en-1-yl)-1,1'-biphenyl (3ra)**

Colorless oil (69.9 mg, 58% yield). (*E/Z* = 65/35)  $^1H$  NMR (400 MHz,  $CDCl_3$ , ppm):  $\delta = 7.67$ - $7.26$  (m, 14 H, Ar), 6.20-6.12 (m, 1 H), 4.13-4.11 (d,  $J = 7.6$  Hz, 2H); 7.67-7.26 (m, 14 H, Ar), 6.20-6.12 (m, 1 H), 4.18-4.16 (d,  $J = 8.0$  Hz, 2H);  $^{13}C$  NMR (100 MHz,  $CDCl_3$ , ppm):  $\delta = 152.4$ , 152.2, 141.6, 141.3, 140.4, 140.2, 140.1, 139.1, 137.2, 136.2, 129.9, 129.4, 128.9, 128.8, 128.6, 128.5, 128.1, 127.8, 127.7, 127.6, 127.4, 127.1, 127.0, 126.9, 119.5 (q,  $J = 326.0$  Hz, 1C), 108.9, 108.7, 51.8; HRMS calcd for  $C_{22}H_{18}F_3O_2S$   $[M+H]^+$  403.0974; found: 403.0977.

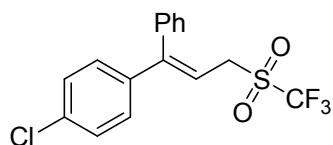

**(*E/Z*)-1-chloro-4-(1-phenyl-3-((trifluoromethyl)sulfonyl)prop-1-en-1-yl)benzene (3sa)**

Colorless oil (44.3 mg, 41% yield). (*E/Z* = 50/50)  $^1H$  NMR (400 MHz,  $CDCl_3$ , ppm):  $\delta = 7.67$ - $7.25$  (m, 9 H, Ar), 6.20-6.12 (m, 1 H), 4.13-4.11 (m, 2 H); 7.67-7.25 (m, 9 H, Ar), 6.20-6.12 (m, 1 H), 4.18-4.16 (m, 2 H);  $^{13}C$  NMR (100 MHz,  $CDCl_3$ , ppm):  $\delta = 152.4$ , 152.2, 141.6, 141.3, 140.4, 140.2, 140.1, 139.1, 137.2, 136.2, 129.9, 129.4, 128.9, 128.8, 128.6, 128.5, 128.1, 127.8, 127.7, 127.6, 127.4, 127.09, 127.06, 127.00, 119.5 (q,  $J = 326.0$  Hz, 1C), 108.9, 108.7, 51.8; HRMS calcd for  $C_{16}H_{13}ClF_3O_2S$   $[M+H]^+$  361.0272; found: 361.0266.

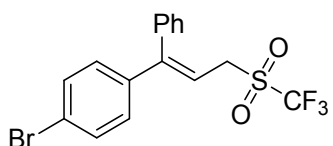

**(*E/Z*)-1-bromo-4-(1-phenyl-3-((trifluoromethyl)sulfonyl)prop-1-en-1-yl)benzene (3ta)**

Colorless oil (48.4 mg, 40% yield). (*E/Z* = 49/51)  $^1H$  NMR (400 MHz,  $CDCl_3$ , ppm):

$\delta = 7.60-7.10$  (m, 9 H, Ar), 6.15-6.09 (m, 1 H), 4.07-4.06 (m, 2 H); 7.60-7.10 (m, 9 H, Ar), 6.15-6.09 (m, 1 H), 4.09-4.08 (m, 2 H);  $^{13}\text{C}$  NMR (75 MHz,  $\text{CDCl}_3$ , ppm):  $\delta = 151.7, 151.6, 139.8, 139.2, 136.7, 136.1, 132.2, 132.1, 131.6, 131.1, 129.3, 129.2, 129.1, 128.9, 128.8, 128.5, 127.6, 123.1, 122.9, 109.4, 109.2, 51.7$ ; HRMS calcd for  $\text{C}_{16}\text{H}_{13}\text{BrF}_3\text{O}_2\text{S}$   $[\text{M}+\text{H}]^+$  404.9766; found: 404.9473.

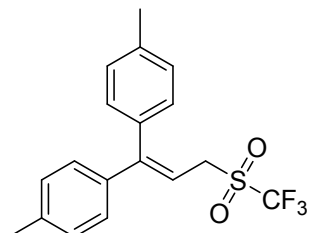

**4,4'-(3-((trifluoromethyl)sulfonyl)prop-1-ene-1,1-diyl)bis(methylbenzene) (3ua)**

Colorless oil (73.3 mg, 69% yield).  $^1\text{H}$  NMR (300 MHz,  $\text{CDCl}_3$ , ppm):  $\delta = 7.24-7.21$  (d,  $J = 6.9$  Hz, 2 H), 7.17-7.07 (m, 6 H), 6.07-6.02 (m, 1 H), 4.11-4.09 (d,  $J = 7.8$  Hz, 2 H), 2.40 (s, 3 H), 2.34 (s, 3 H);  $^{13}\text{C}$  NMR (75 MHz,  $\text{CDCl}_3$ , ppm):  $\delta = 152.5, 138.8, 138.3, 137.7, 134.4, 129.4, 129.3, 129.0, 127.6, 119.5$  (q,  $J = 326.3$  Hz, 1C), 107.6, 51.9, 21.2, 21.1; HRMS calcd for  $\text{C}_{18}\text{H}_{18}\text{F}_3\text{O}_2\text{S}$   $[\text{M}+\text{H}]^+$  355.0974; found: 355.0966.

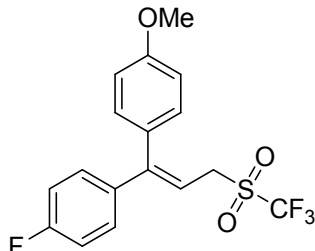

**(*E/Z*)-1-fluoro-4-(1-(4-methoxyphenyl)-3-((trifluoromethyl)sulfonyl)prop-1-en-1-yl)benzene (3va)**

Colorless oil (56.1 mg, 50% yield). (*E/Z* = 65/35)  $^1\text{H}$  NMR (300 MHz,  $\text{CDCl}_3$ , ppm):  $\delta = 7.24-7.10$  (m, 5 H), 7.07-6.93 (m, 2 H), 6.87-6.81 (m, 1 H), 6.05-6.00 (m, 1 H), 4.14-4.05 (m, 2 H), 3.86-3.81 (m, 3H);  $^{13}\text{C}$  NMR (75 MHz,  $\text{CDCl}_3$ , ppm):  $\delta = 164.6, 164.3, 161.0, 160.2, 159.7, 151.4, 151.3, 133.4, 133.3, 132.7, 131.3, 131.2, 130.7, 129.6, 129.5, 129.2, 128.9, 119.5$  (q,  $J = 326.3$  Hz, 1C), 116.0, 115.7, 115.4, 115.2, 114.2, 113.8, 108.2, 106.9, 55.3, 51.8; HRMS calcd for  $\text{C}_{17}\text{H}_{15}\text{F}_4\text{O}_3\text{S}$   $[\text{M}+\text{H}]^+$  375.0673; found: 375.0678.

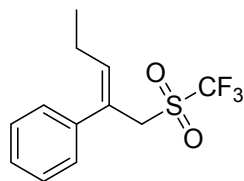

**(E)-1-((trifluoromethyl)sulfonyl)pent-2-en-2-ylbenzene (5aa)**

Yellow oil (33.4 mg, 40% yield). <sup>1</sup>H NMR (400 MHz, CDCl<sub>3</sub>, ppm):  $\delta$  = 7.40-7.37 (m, 2 H), 7.33-7.29 (m, 2 H), 7.26-7.23 (m, 1 H), 5.79-5.75 (m, 1 H), 3.62-3.59 (t,  $J$  = 7.2 Hz, 1 H), 2.71-2.66 (m, 2H), 2.06 (d,  $J$  = 1.2 Hz, 3 H); <sup>13</sup>C NMR (100 MHz, CDCl<sub>3</sub>, ppm):  $\delta$  = 143.4, 138.0, 128.3, 127.1, 125.8, 123.6, 44.2, 32.3, 16.2; HRMS calcd for C<sub>12</sub>H<sub>14</sub>F<sub>3</sub>O<sub>2</sub>S [M+H]<sup>+</sup> 279.0661; found: 279.0655.

## References

- [1] J.-C. Wu, L.-B. Gong, Y. Xia, R.-J. Song, Y.-X. Xie and J.-H. Li, *Angew. Chem. Int. Ed.*, 2012, **51**, 9909.
- [2] W. M. Sherrill, R. Kim and M. Rubina, *Tetrahedron.*, 2008, **64**, 8610.
- [3] J. Kuang and S. Ma, *J. Am. Chem. Soc.*, 2010, **132**, 1786.
- [4] L. H. Mohammad, F. Ye, Y. Zhang and J. Wang, *J. Org. Chem.*, 2013, **78**, 1236.
- [5] J. Liu, M. Nie, Q. Zhou, S. Gao, W. Jiang, L.-W. Chung, W. Tang and K. Ding, *Chem. Sci.*, 2017, **8**, 5161.
- [6] Z. Zhao, L. Racicot and G. K. Murphy, *Angew. Chem. Int. Ed.*, 2017, **56**, 11620.
- [7] F. Ye, C. Wang, X. Ma, M. L. Hossain, Y. Xia, Y. Zhang and J. Wang, *J. Org. Chem.*, 2015, **80**, 647.
- [8] X. Yang, Y. She, Y. Chong, H. Zhai, H. Zhu, B. Chen, G. Huang and R. Yan, *Adv. Synth. Catal.*, 2016, **358**, 3130.
- [9] K. Kiyokawa, S. Hata, S. Kainuma and S. Minakata, *Chem. Commun.*, 2019, **55**, 458.
- [10] T. Sawano, K. Qu, T. Nishimura and T. Hayashi, *J. Org. Chem.*, 2013, **78**, 8986.
- [11] H. Jang, B. Jung and A. H. Hoveyda, *Org. Lett.*, 2014, **16**, 4658.
- [12] G. Kumaraswamy, S. Vijaykumar, K. Ankamma and V. Narayanarao, *Org. Biomol. Chem.*, 2016, **14**, 11415.
- [13] M. Brochetta, T. Borsari, A. Gandini, S. Porey, A. Deb, E. Casali, A. Chakraborty, G. Zanoni and D. Maiti, *Chem. Eur. J.*, 2019, **25**, 750.
- [14] K. Kobayashi, H. Naka, A. E. H. Wheatley and Y. Kondo, *Org. Lett.*, 2008, **10**, 3375.
- [15] C.-H. Liu and Z.-X. Yu, *Org. Biomol. Chem.*, 2016, **14**, 5945.
- [16] H. Hori, S. Arai and A. Nishida, *Adv. Synth. Catal.*, 2017, **359**, 1170.
- [17] V. K.-Y. Lo, M.-K. Wong and C.-M. Che, *Org. Lett.*, 2008, **10**, 517.
- [18] H. Clavier, K. L. Jeune, I. D. Riggi, A. Tenaglia and G. Buono, *Org. Lett.*, 2019, **13**, 308.
- [19] M.-H. Lin, W.-S. Tsai, L.-Z. Lin, S.-F. Hung, T.-H. Chuang and Y.-J. Su, *J. Org. Chem.*, 2011, **76**, 8518.
- [20] M. Kidonakis and M. Stratakis, *ACS. Catal.*, 2018, **8**, 1227.

[21] S. Chanthamath, H. W. Chua, S. Kimura, K. Shibatomi and S. Iwasa, *Org. Lett.*, 2014, **16**, 3408.

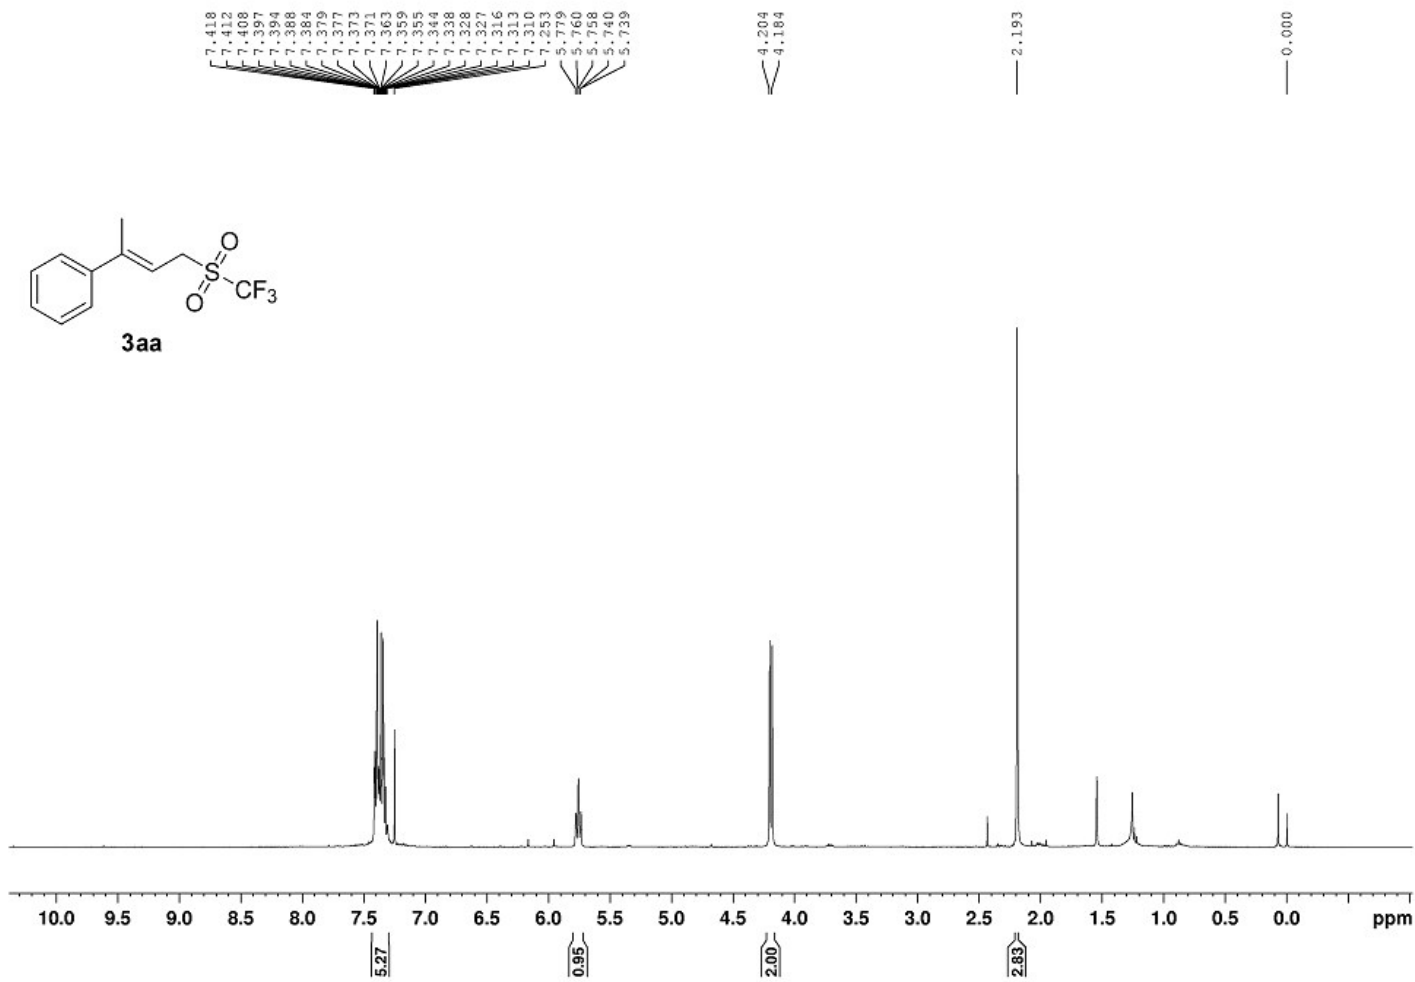

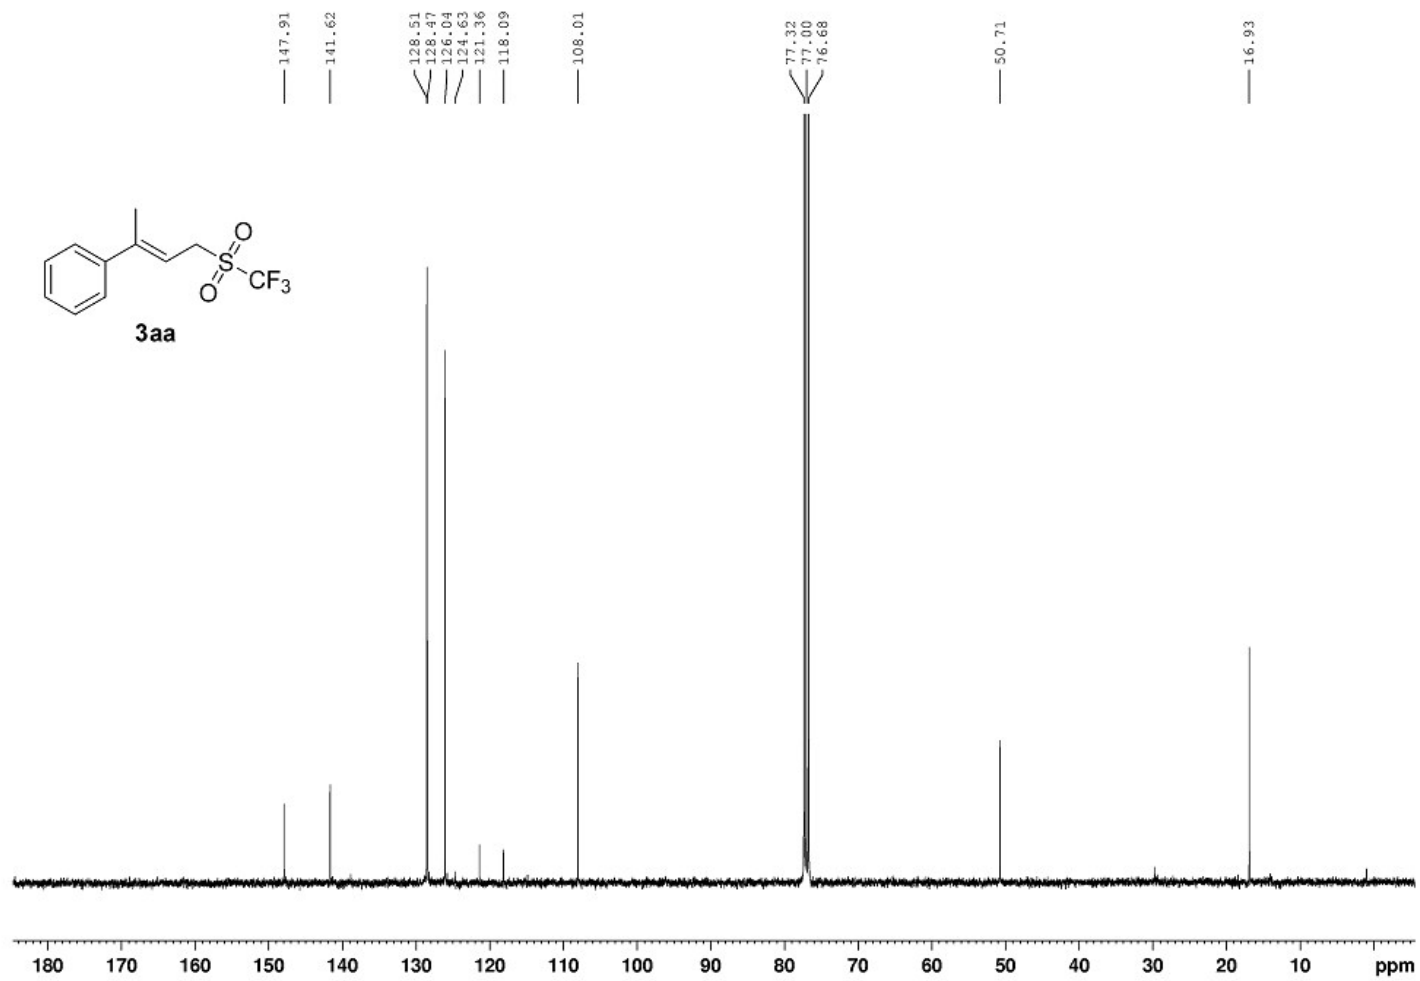



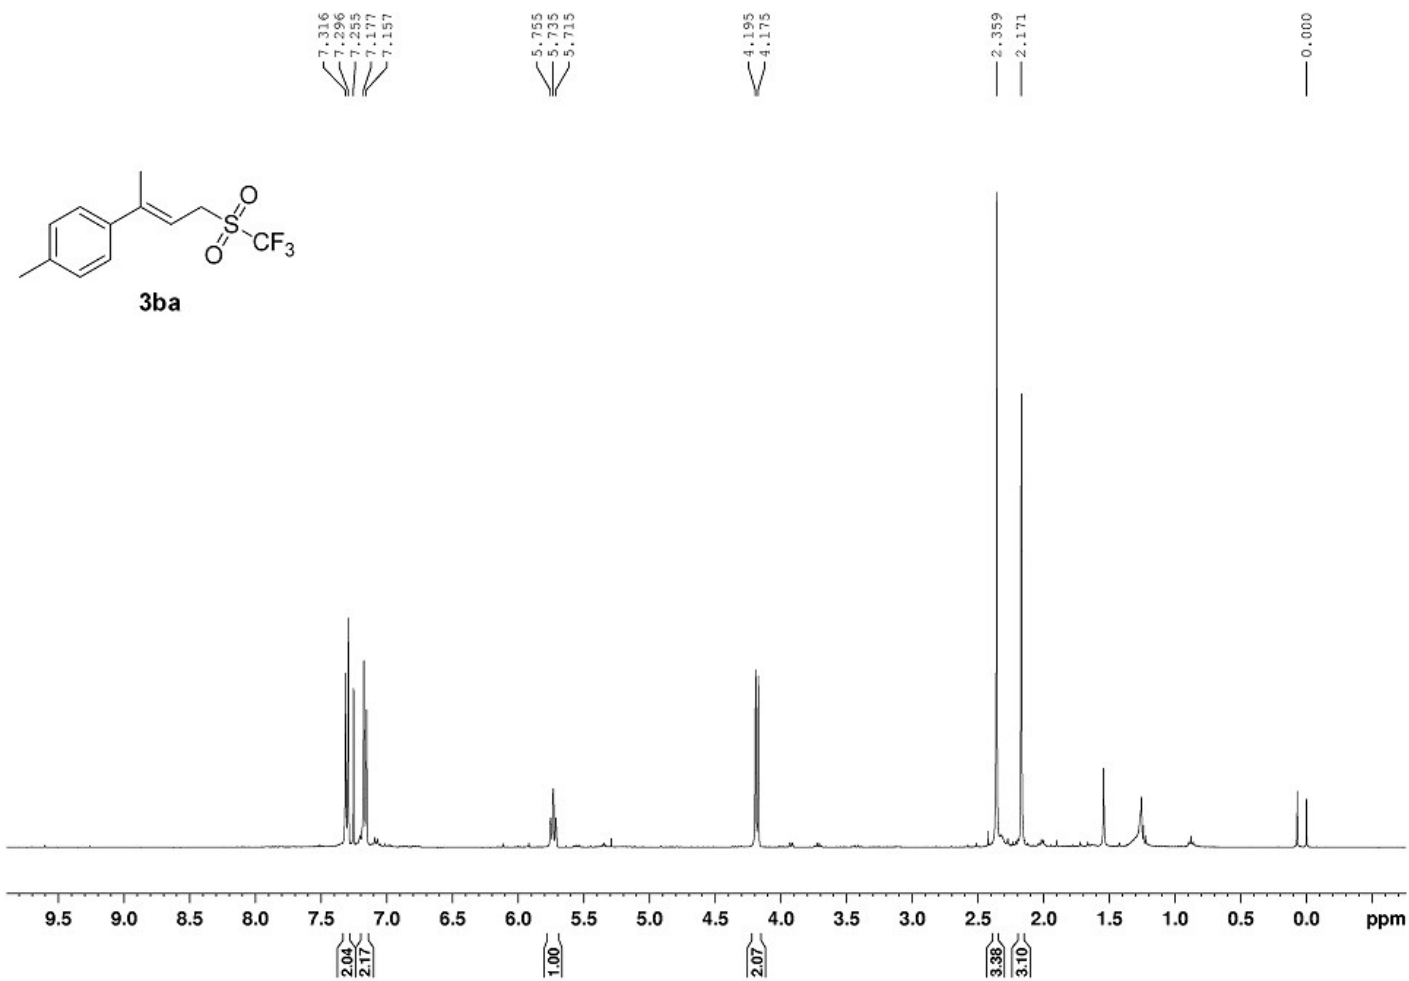

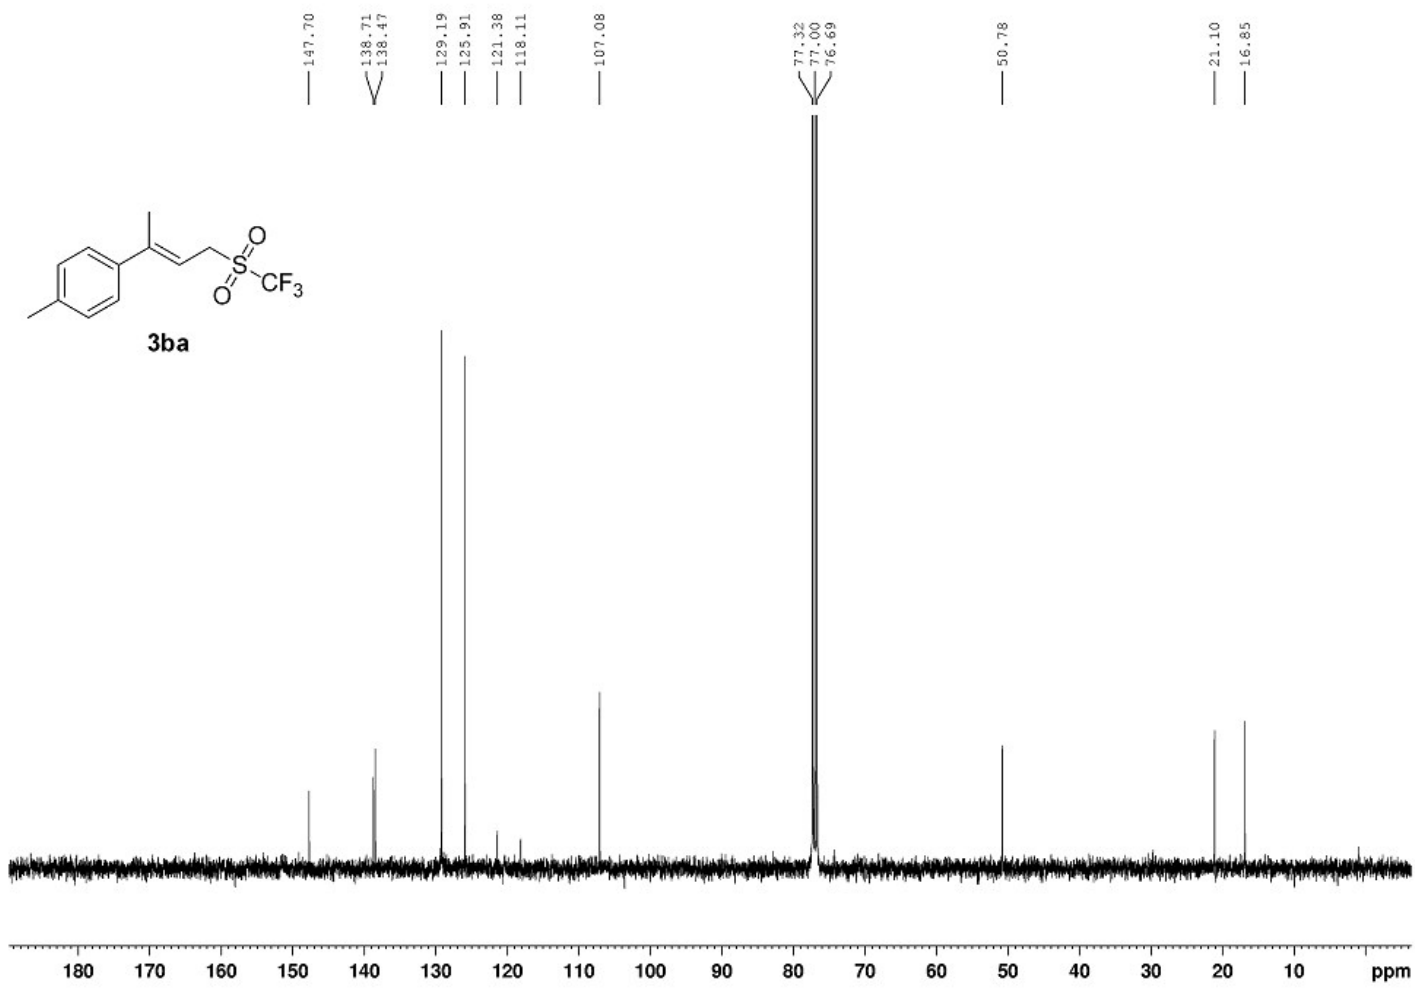

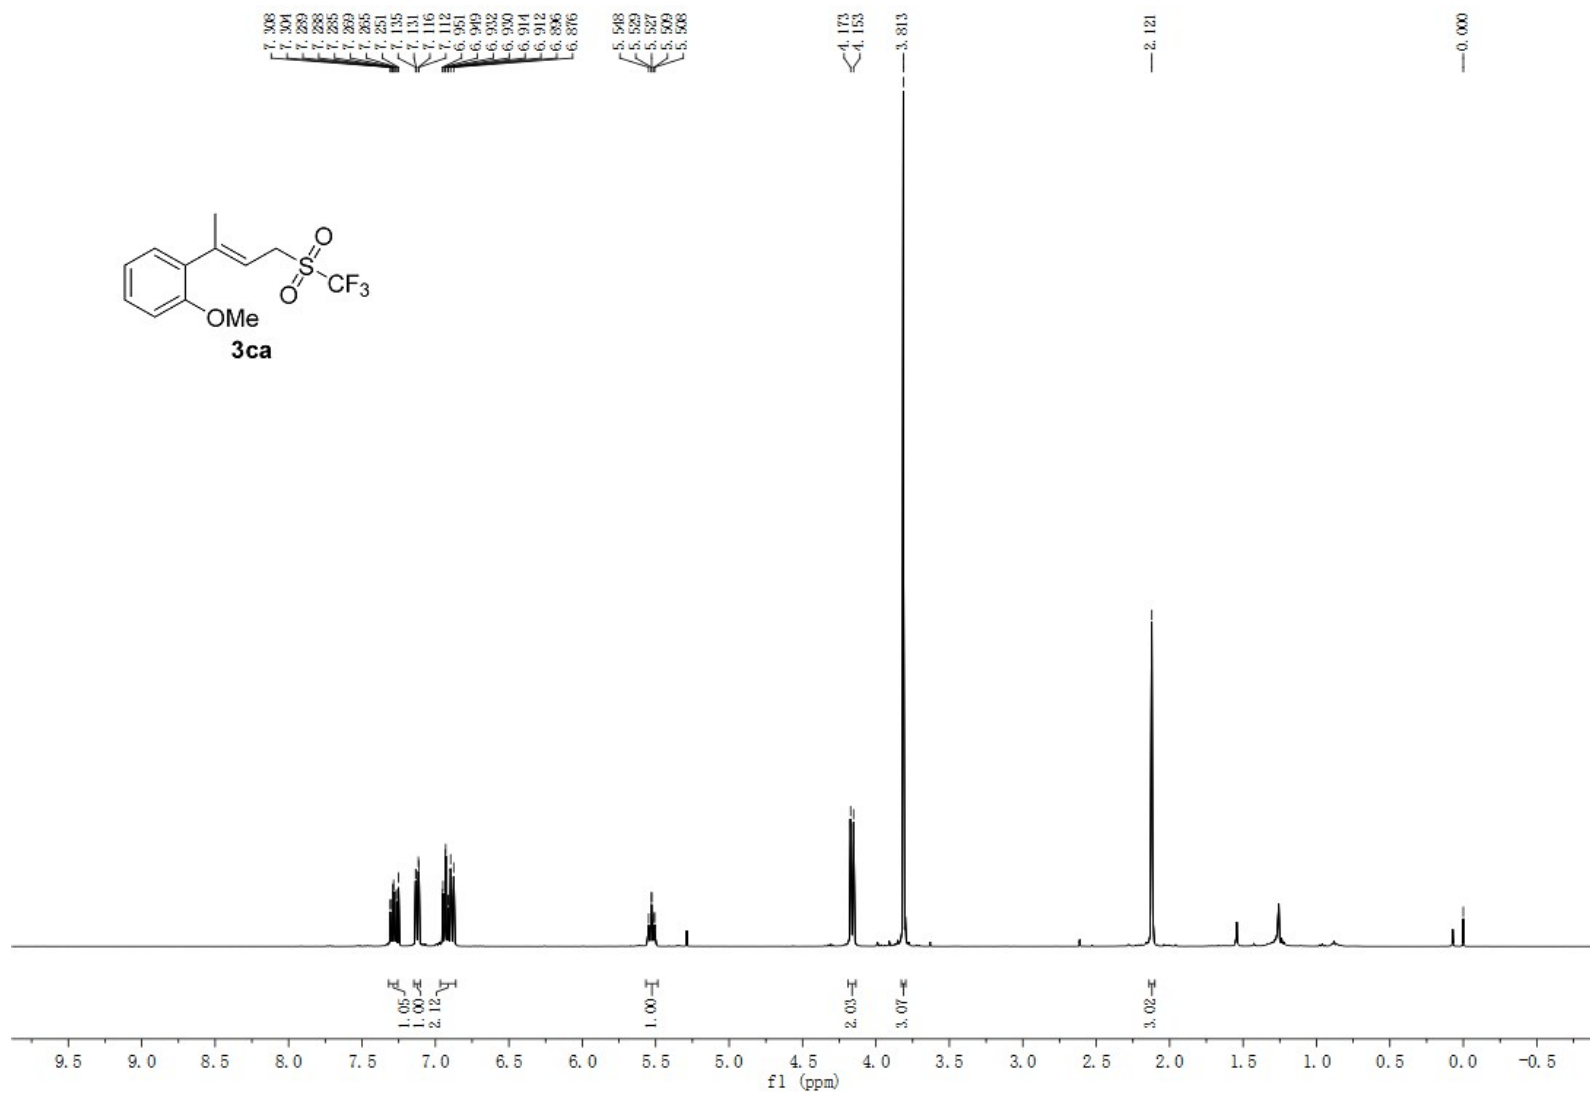

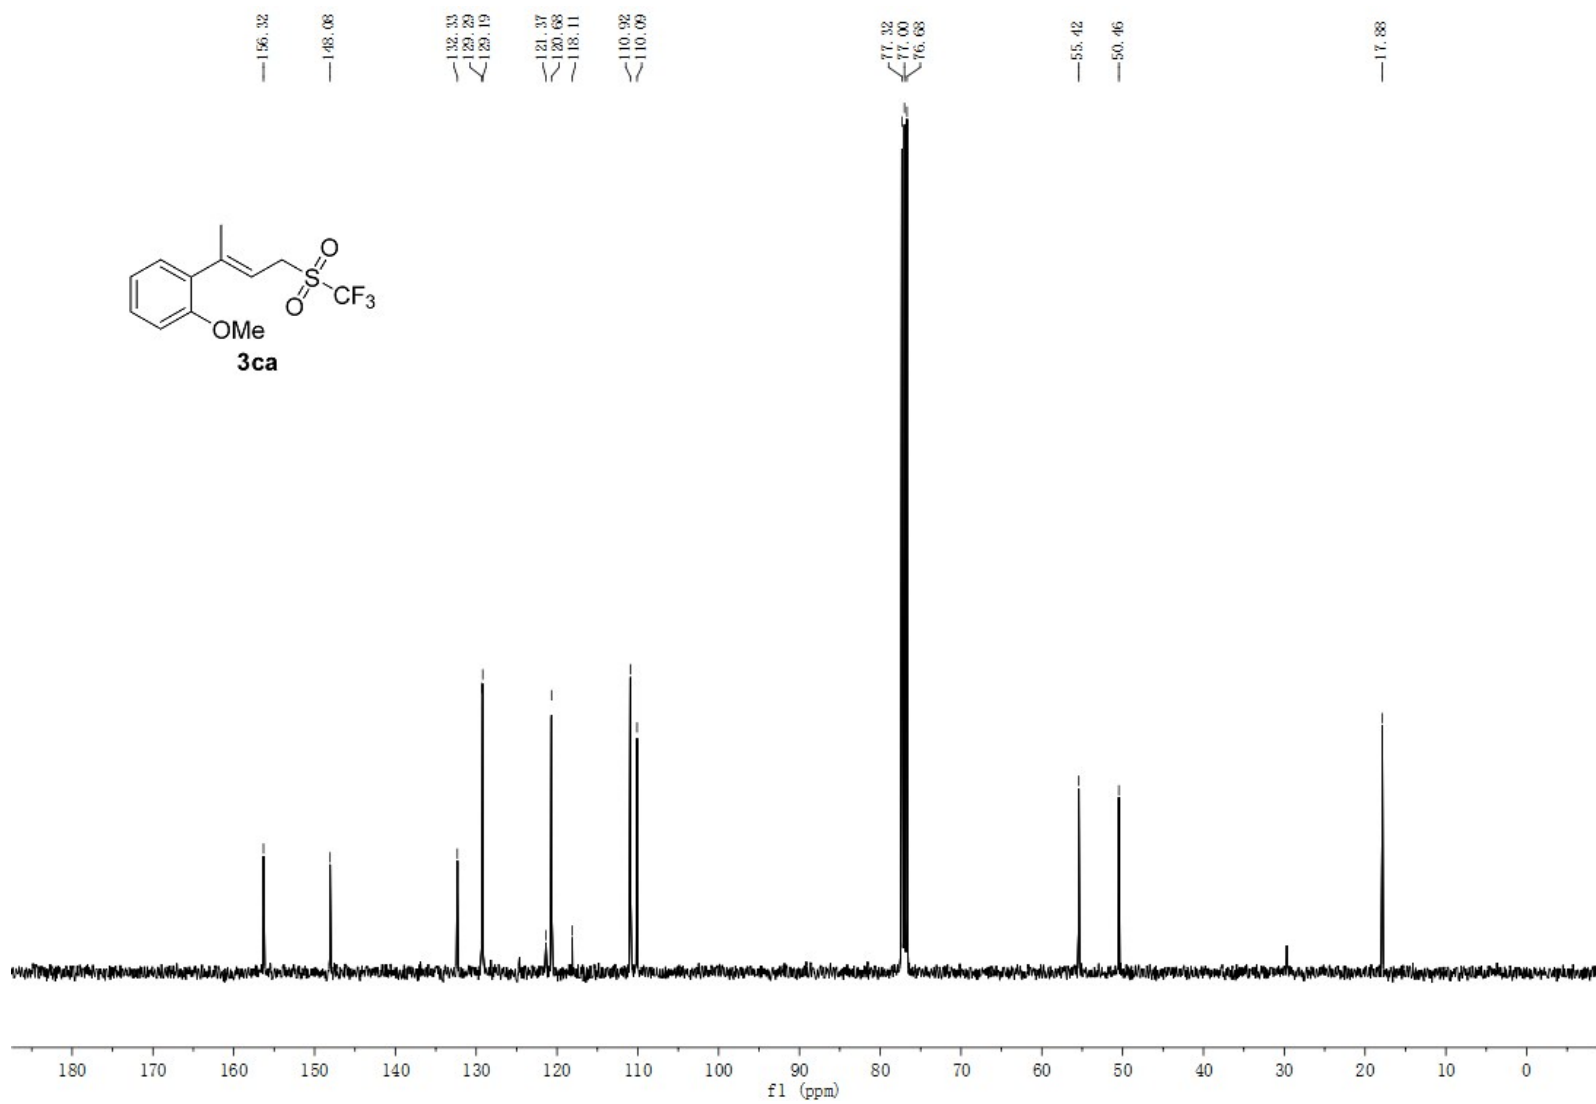

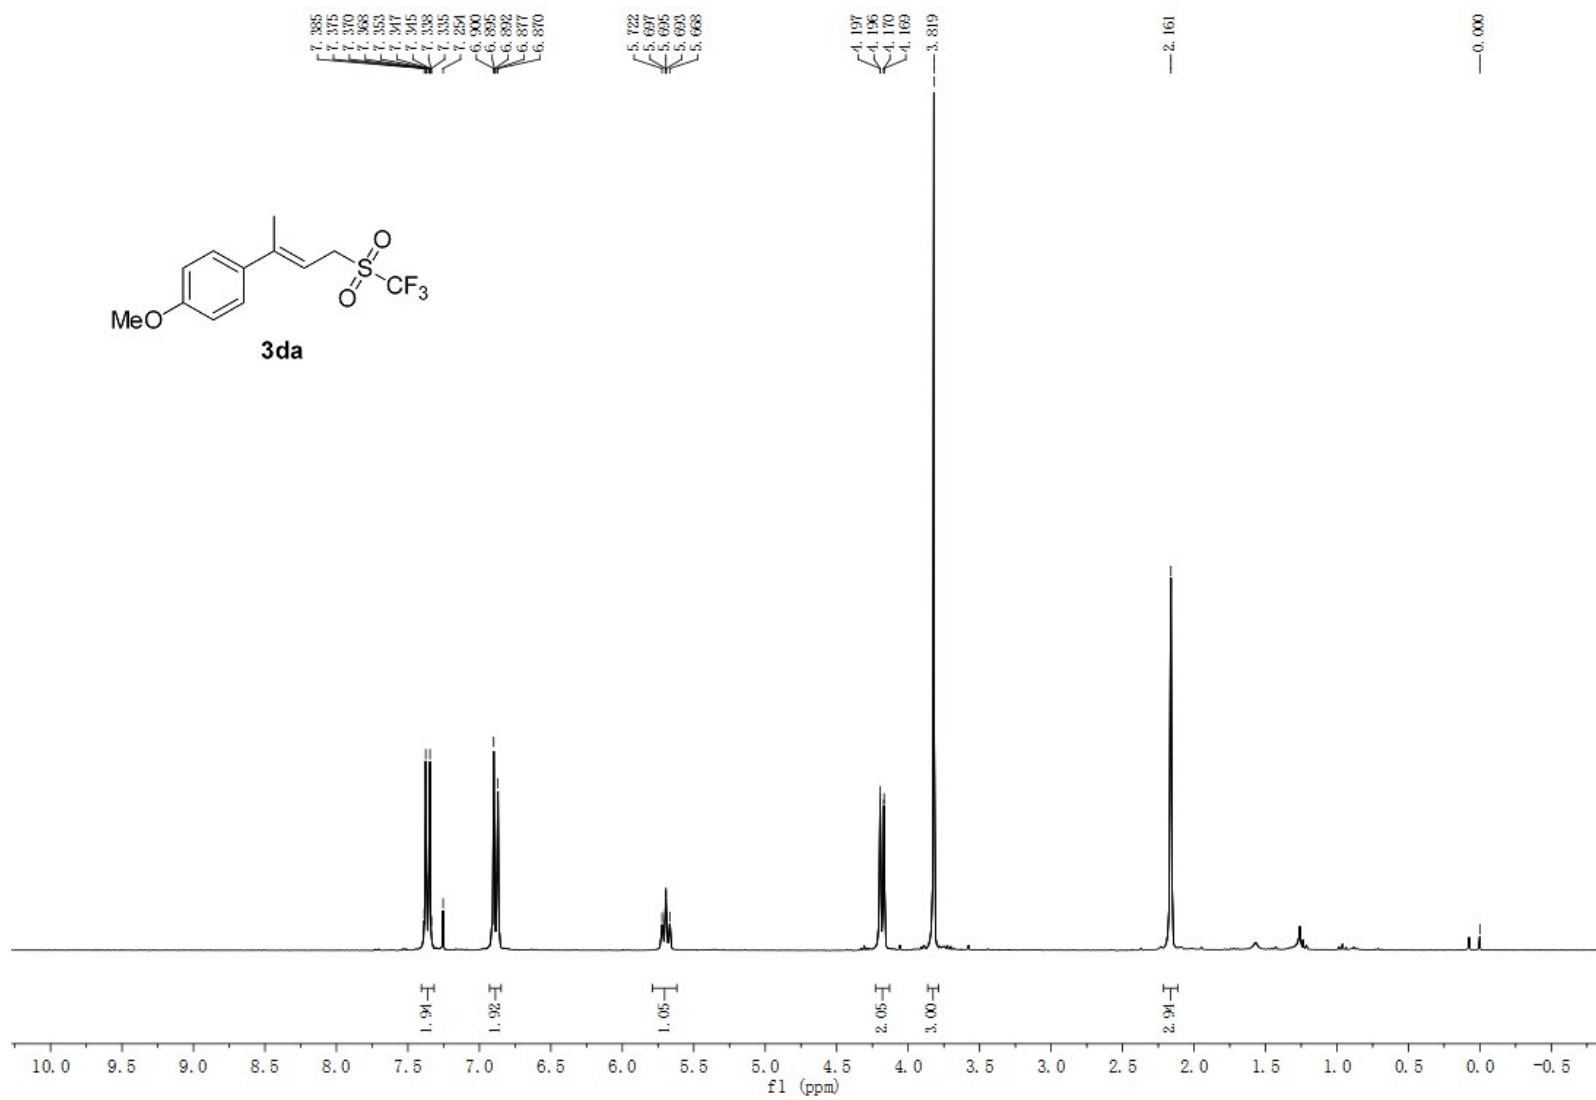

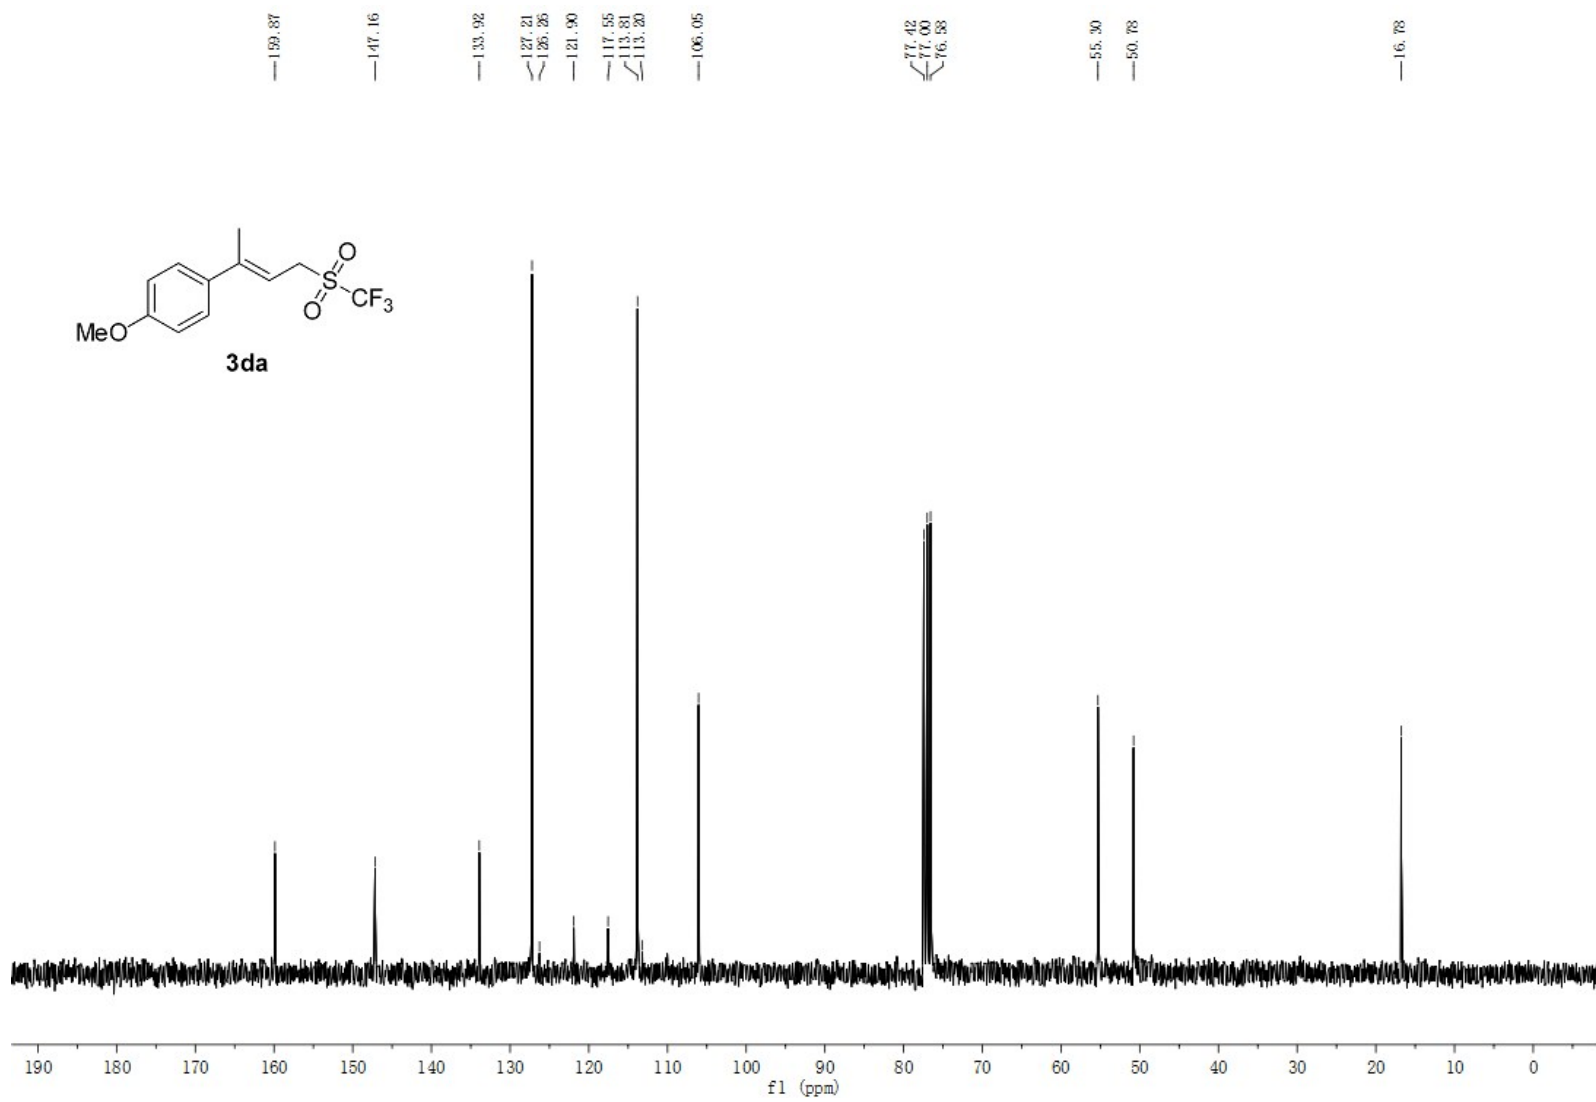

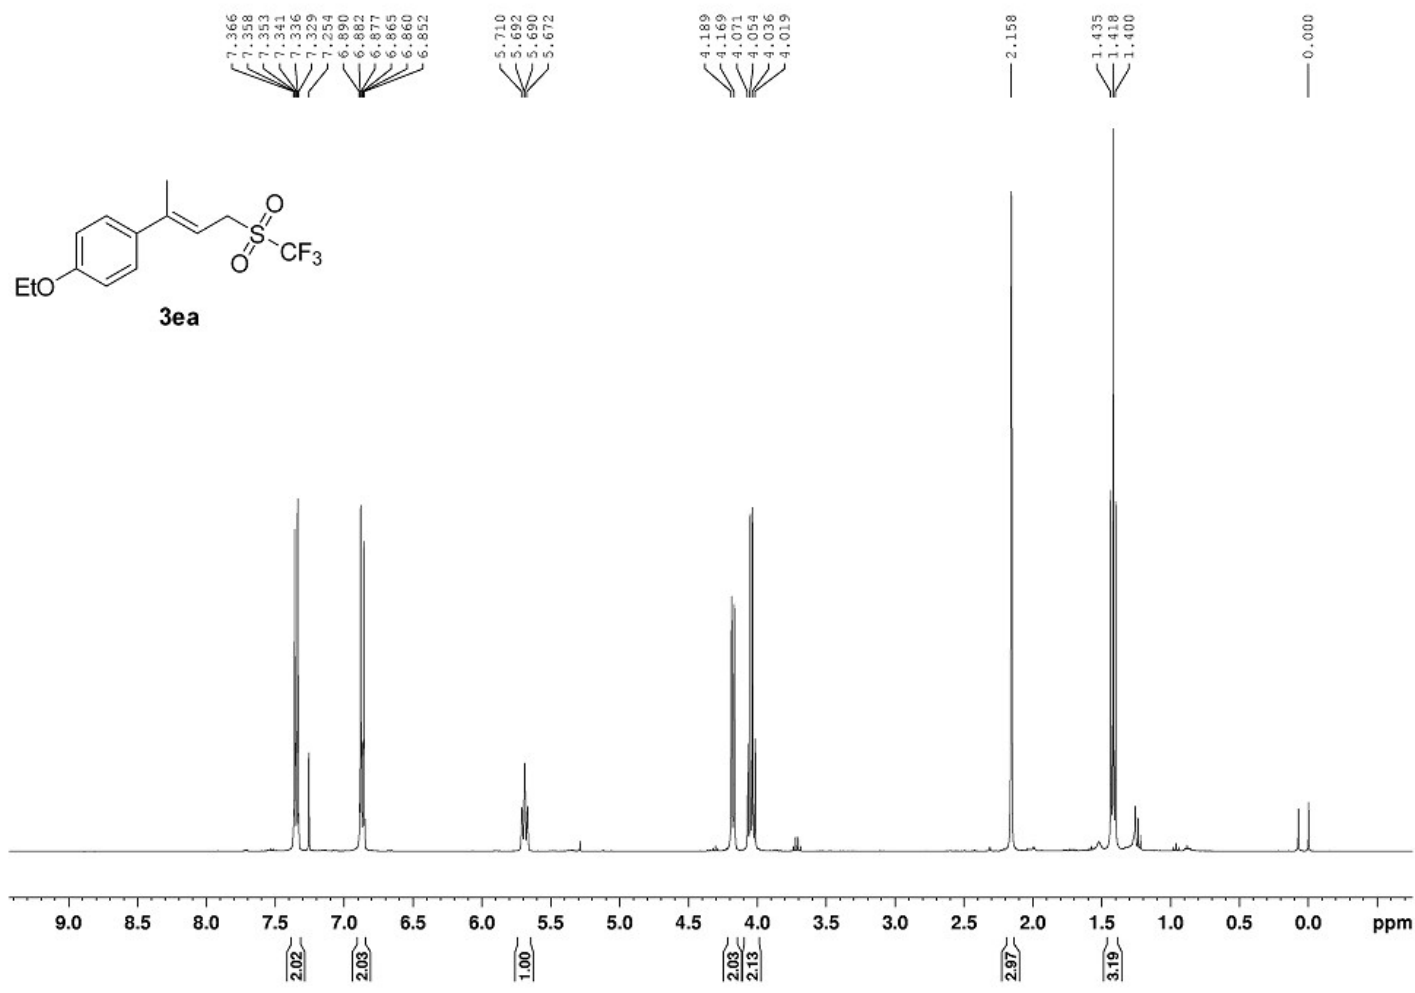

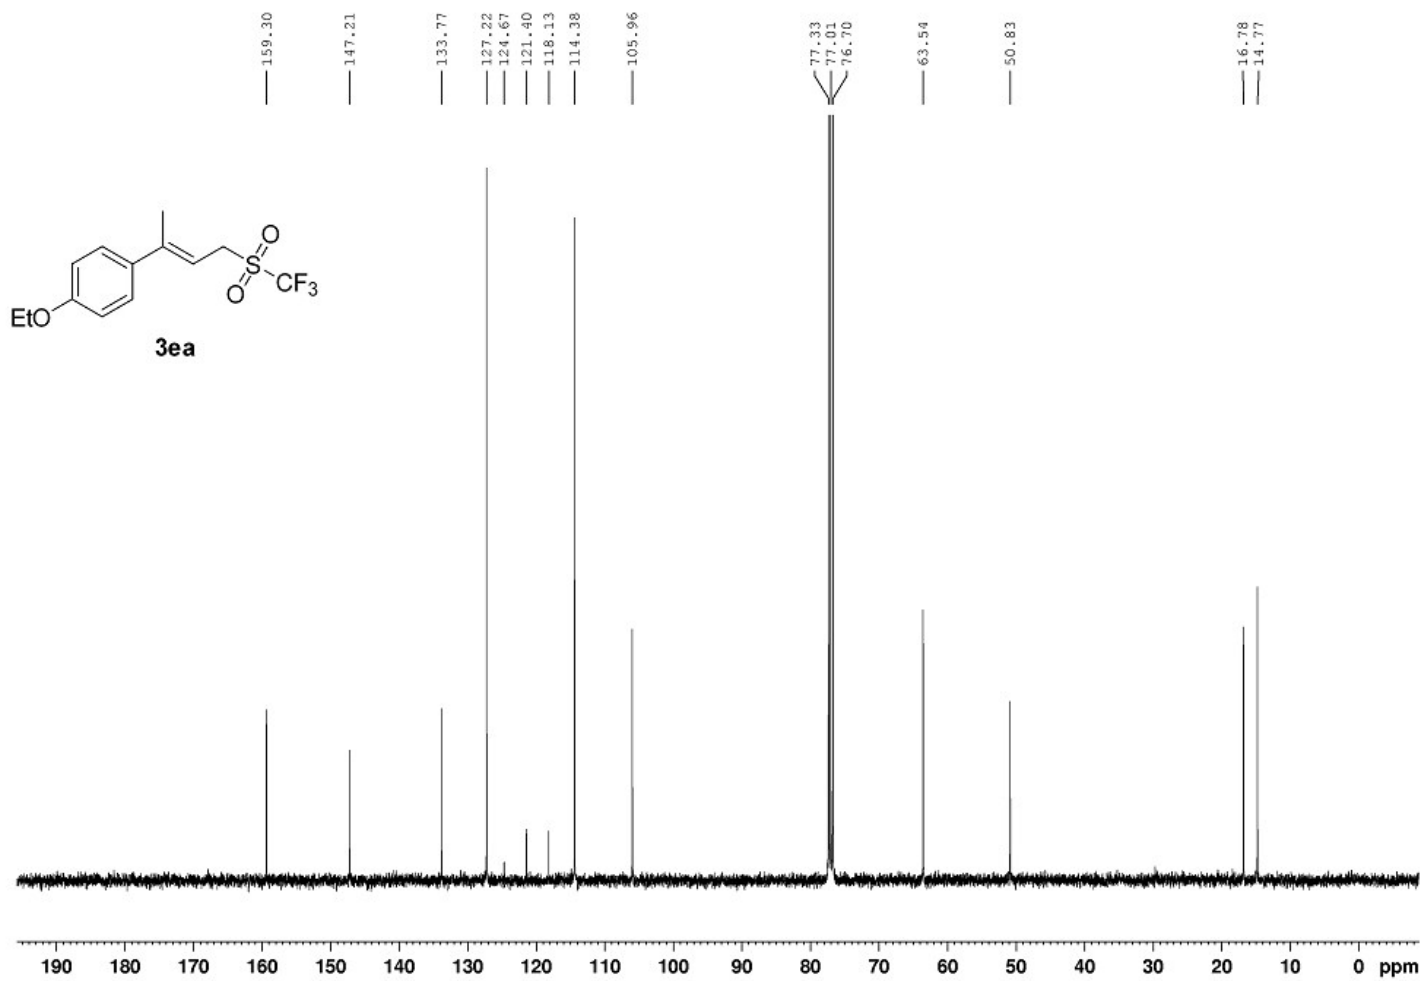



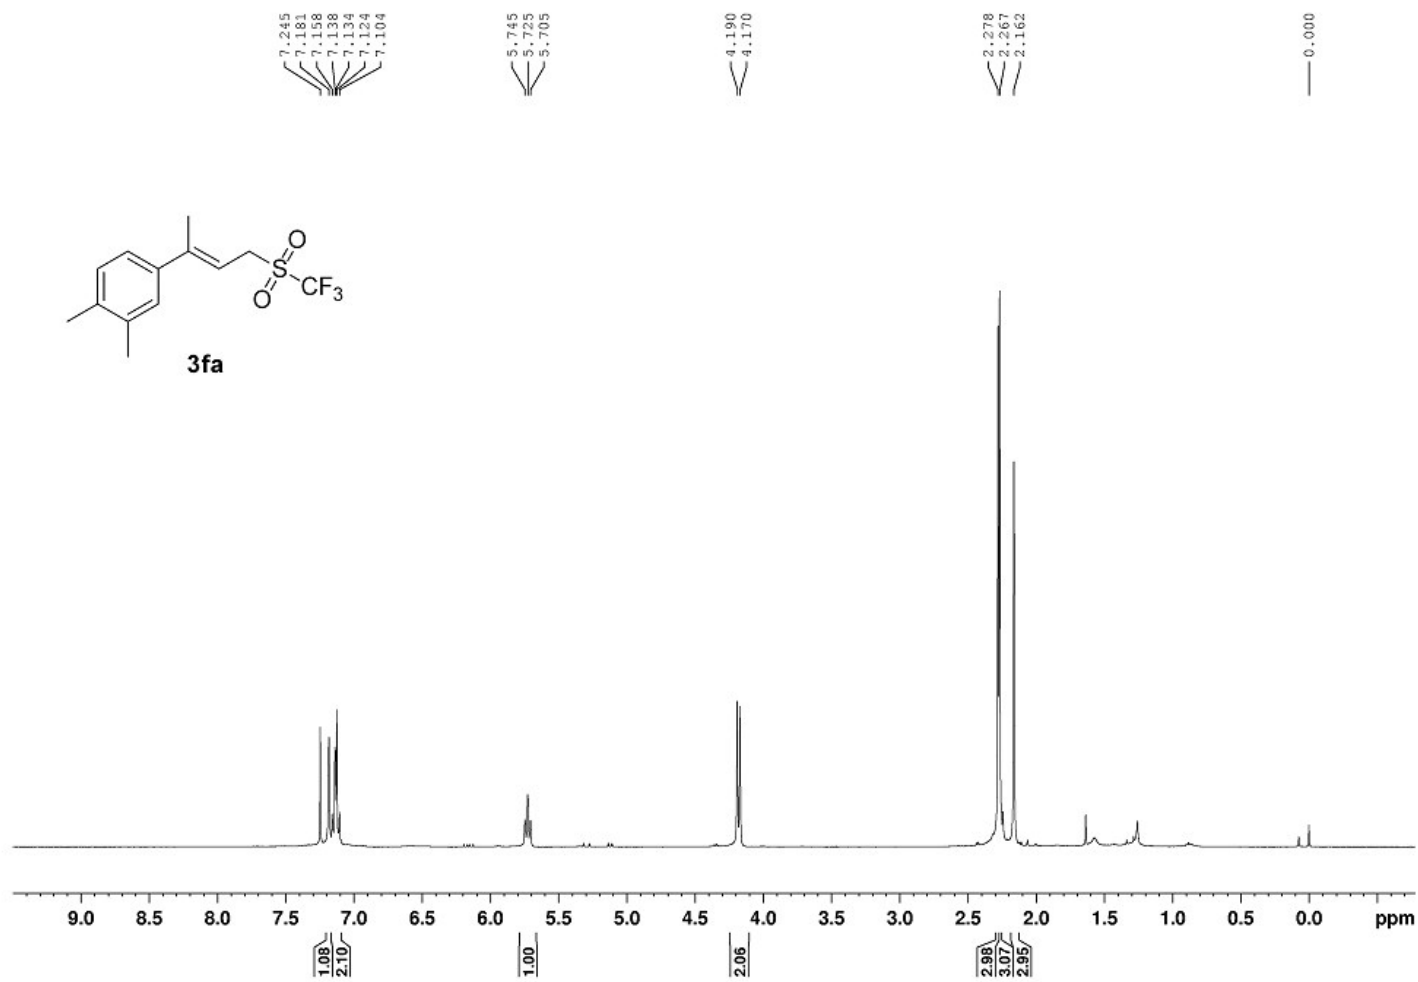

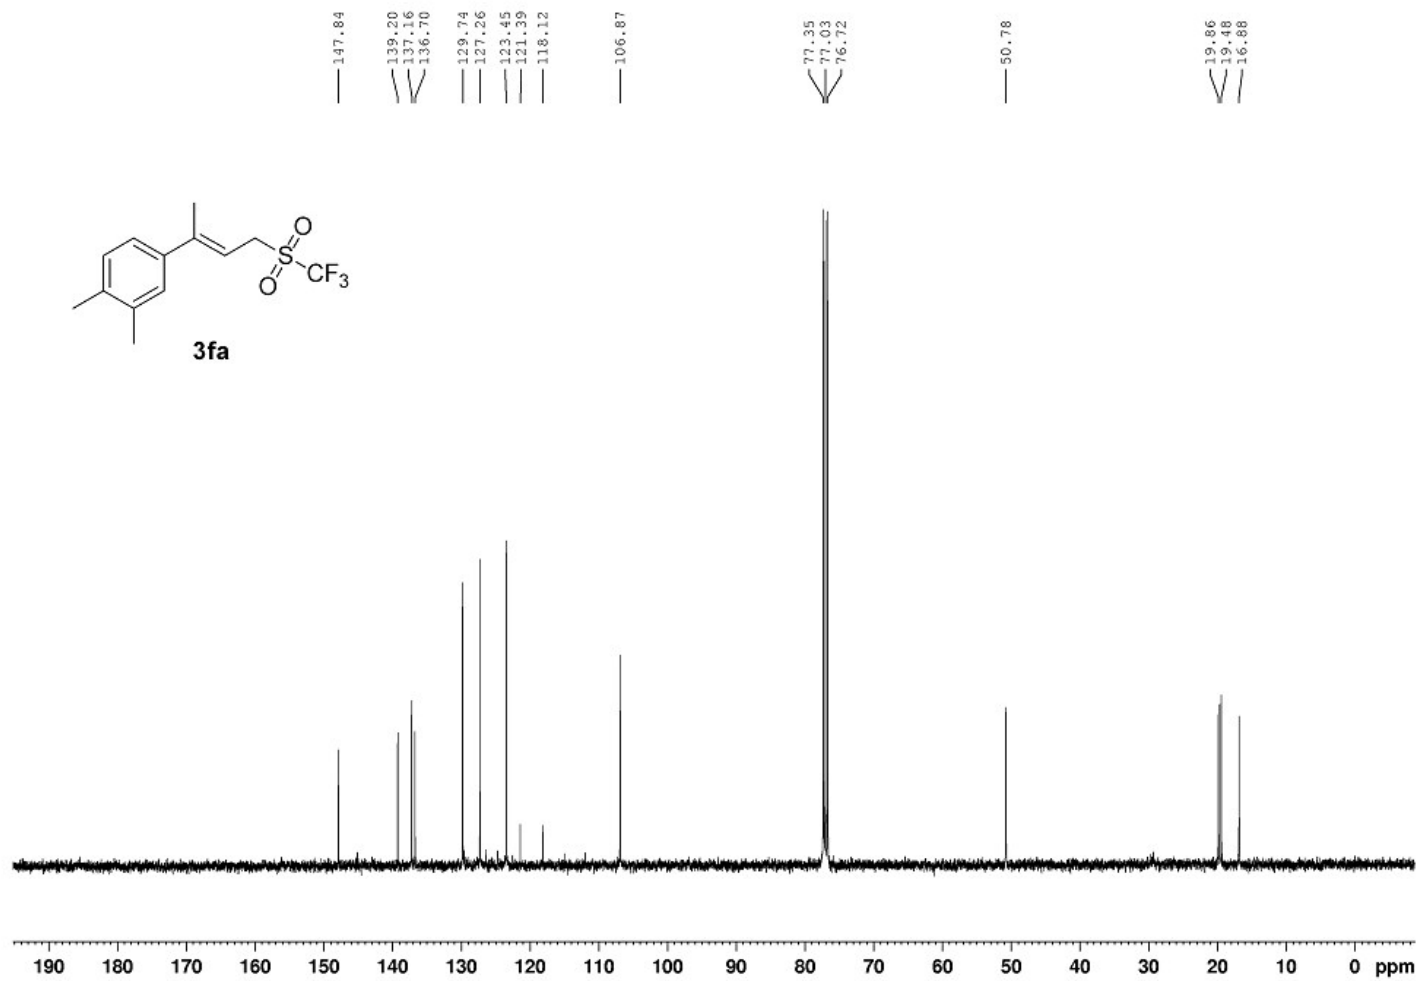

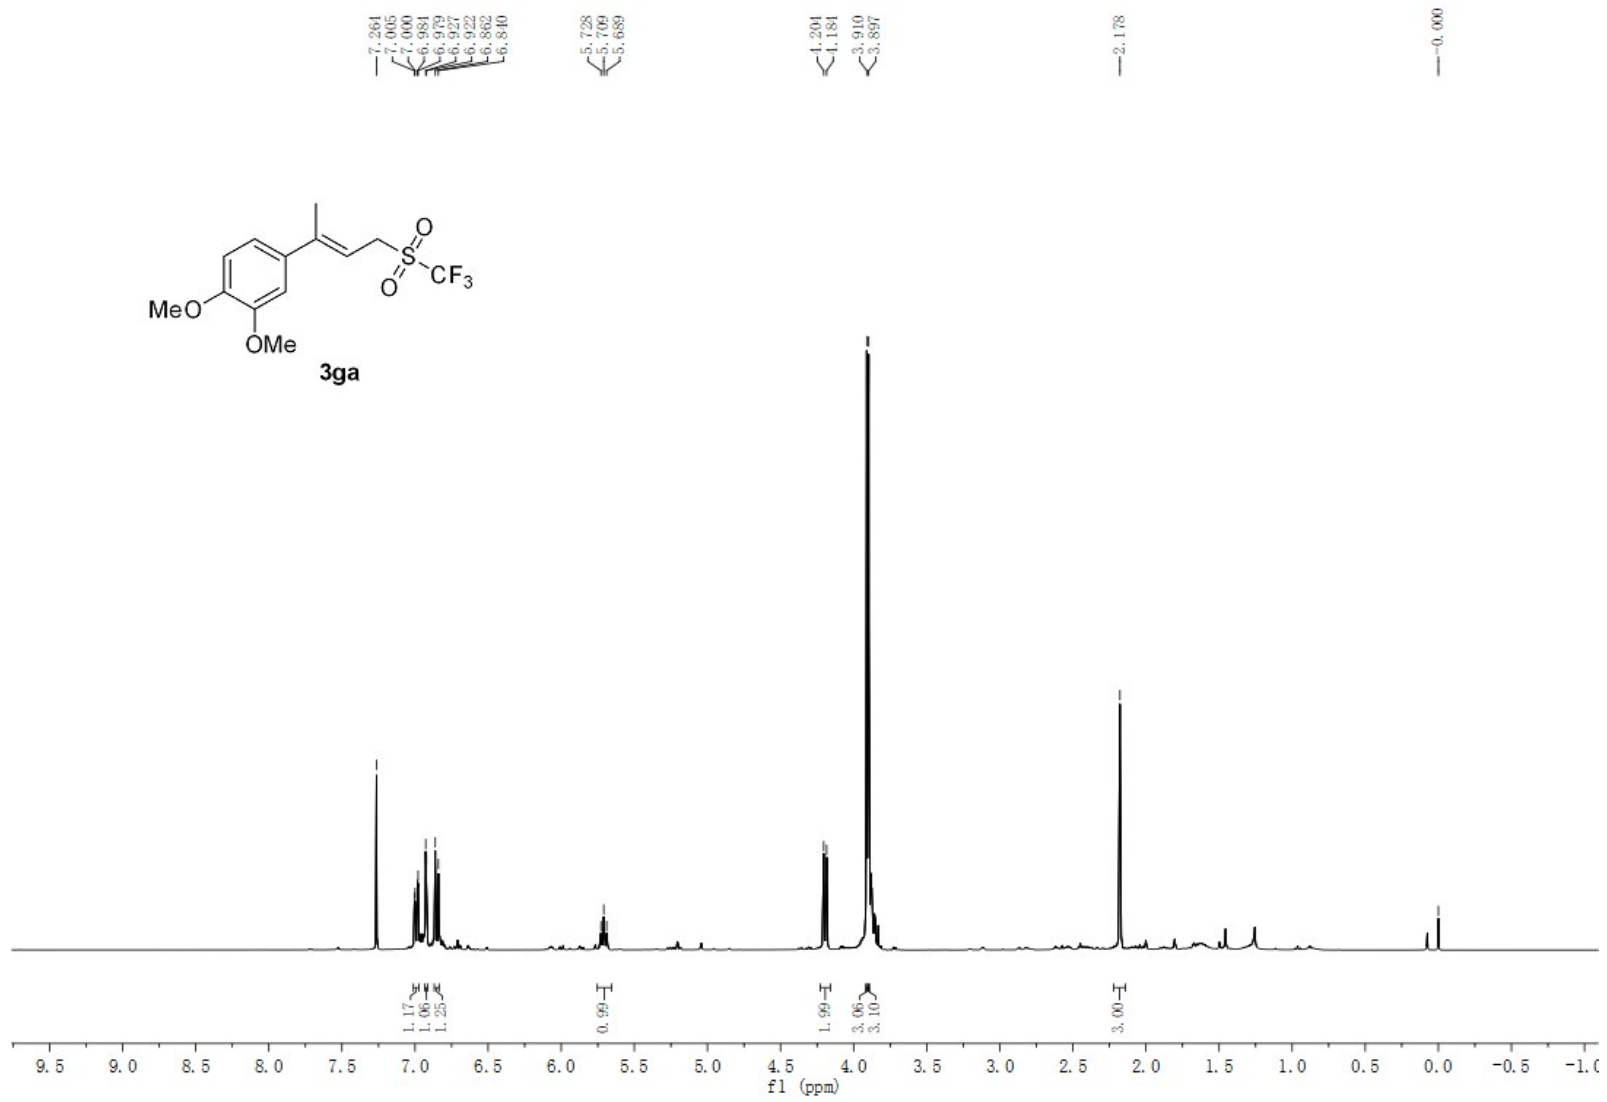

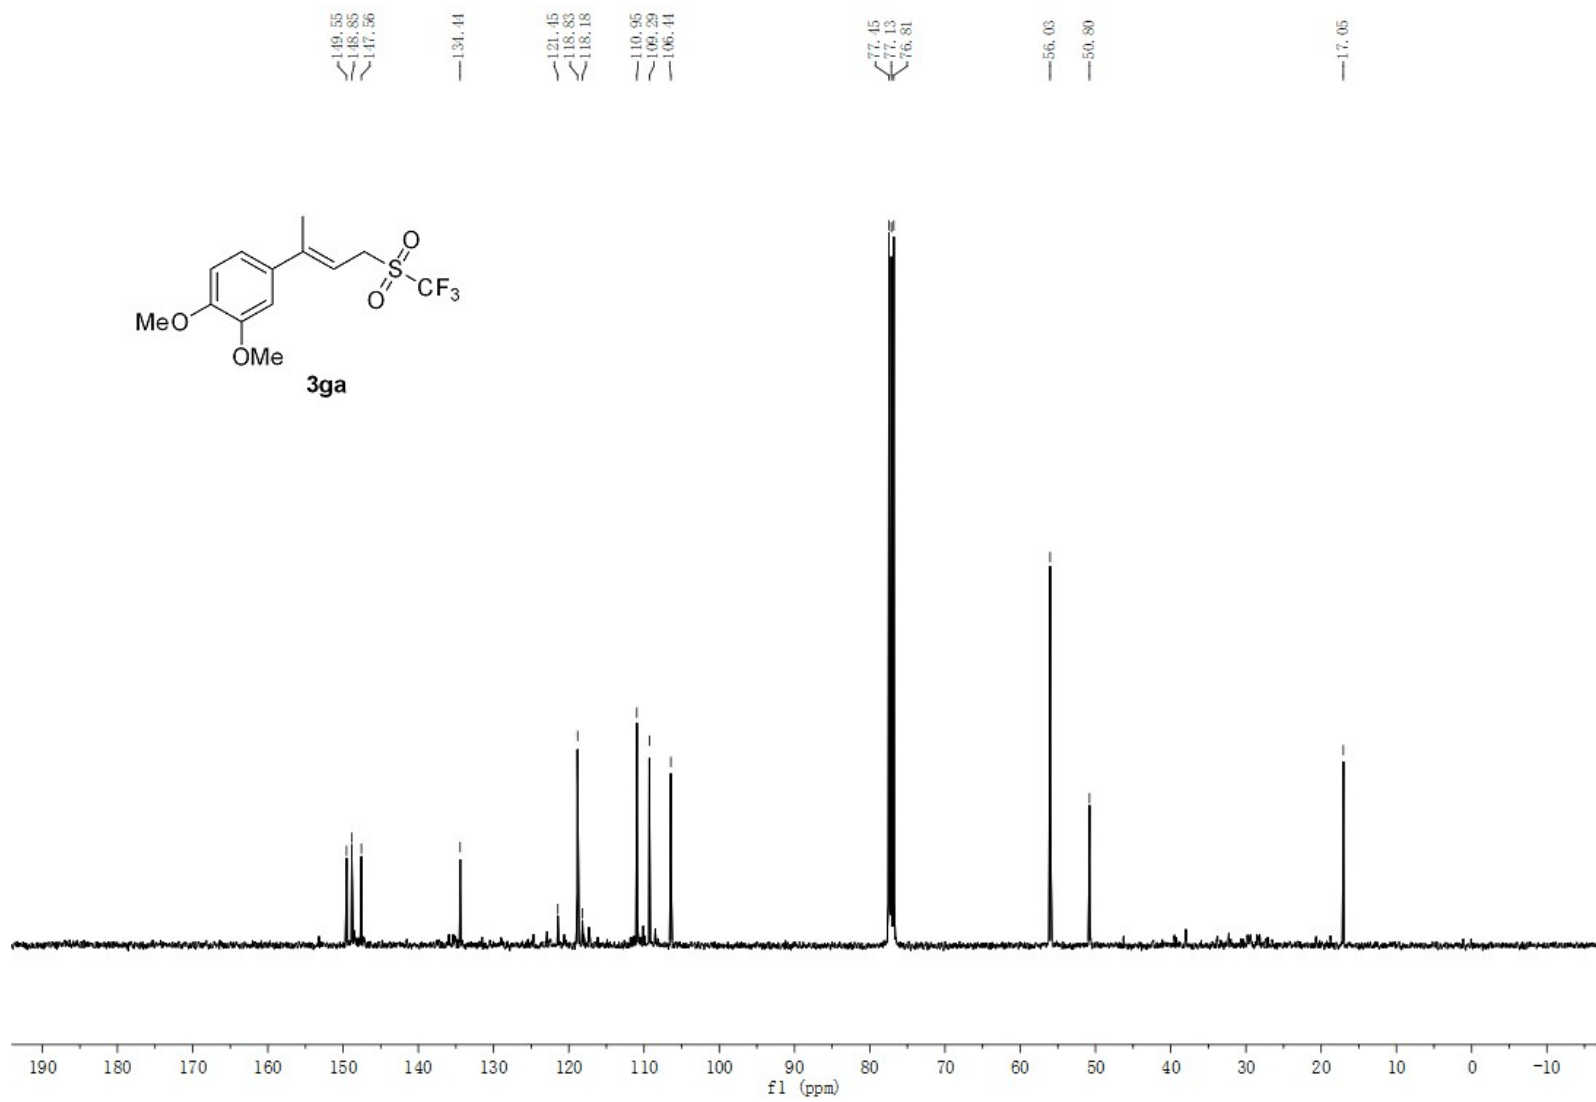

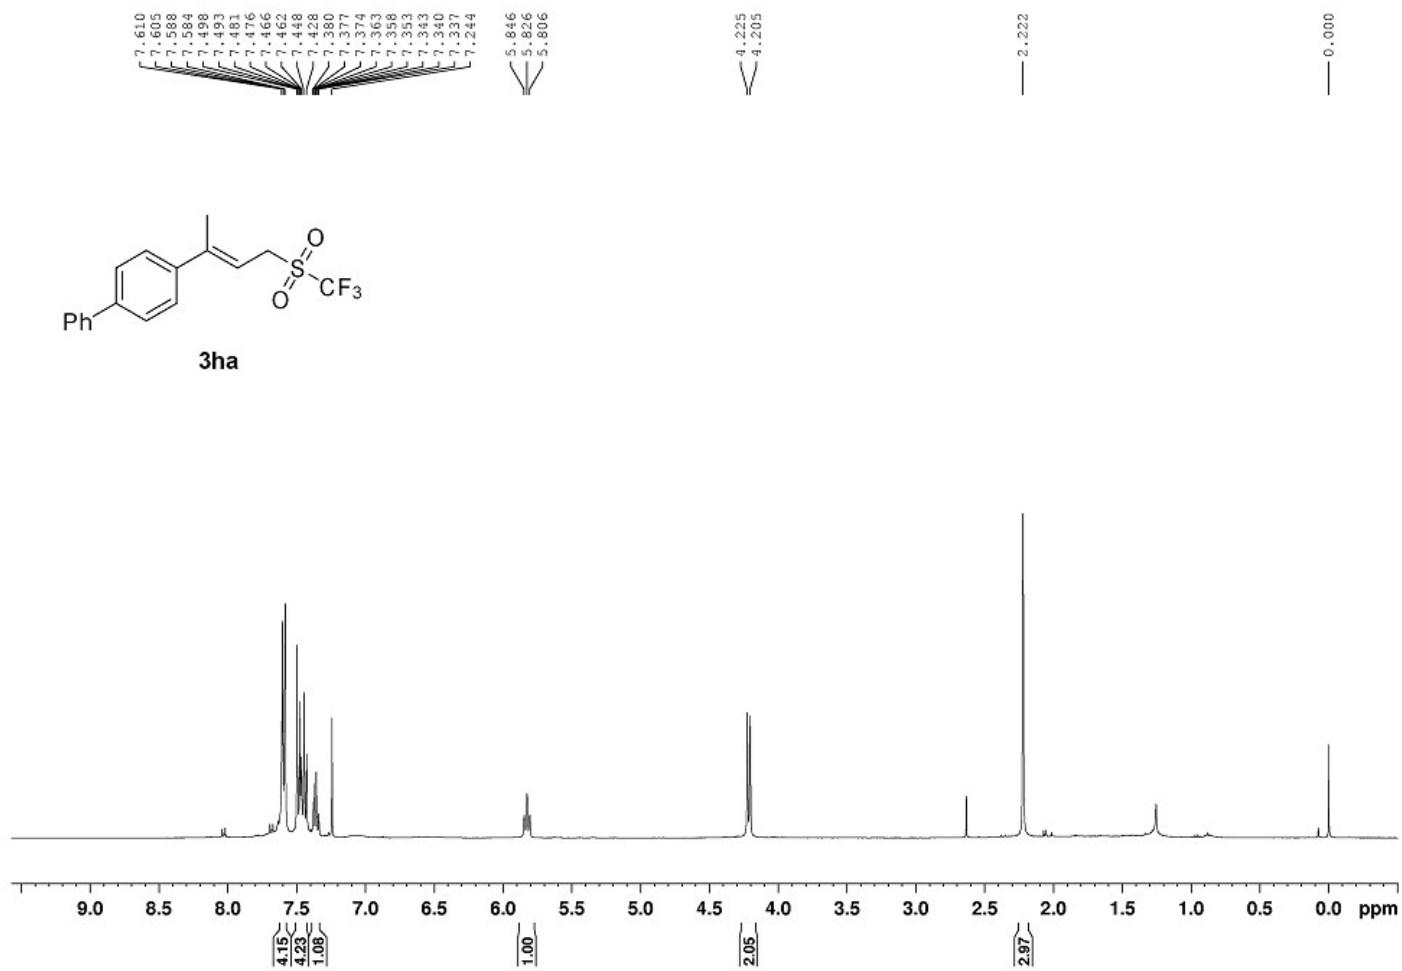

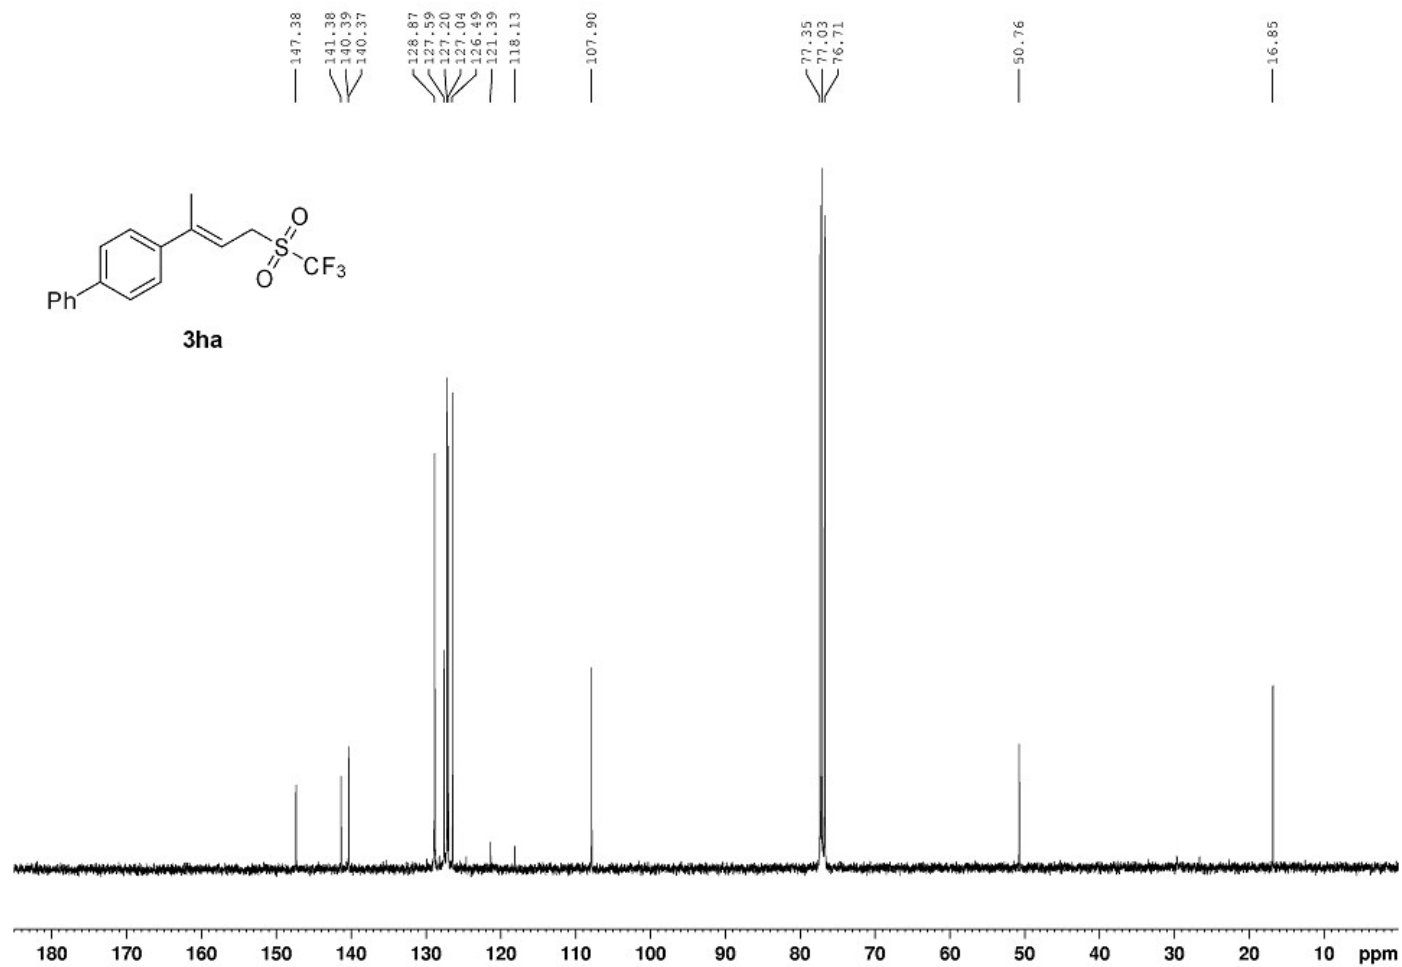

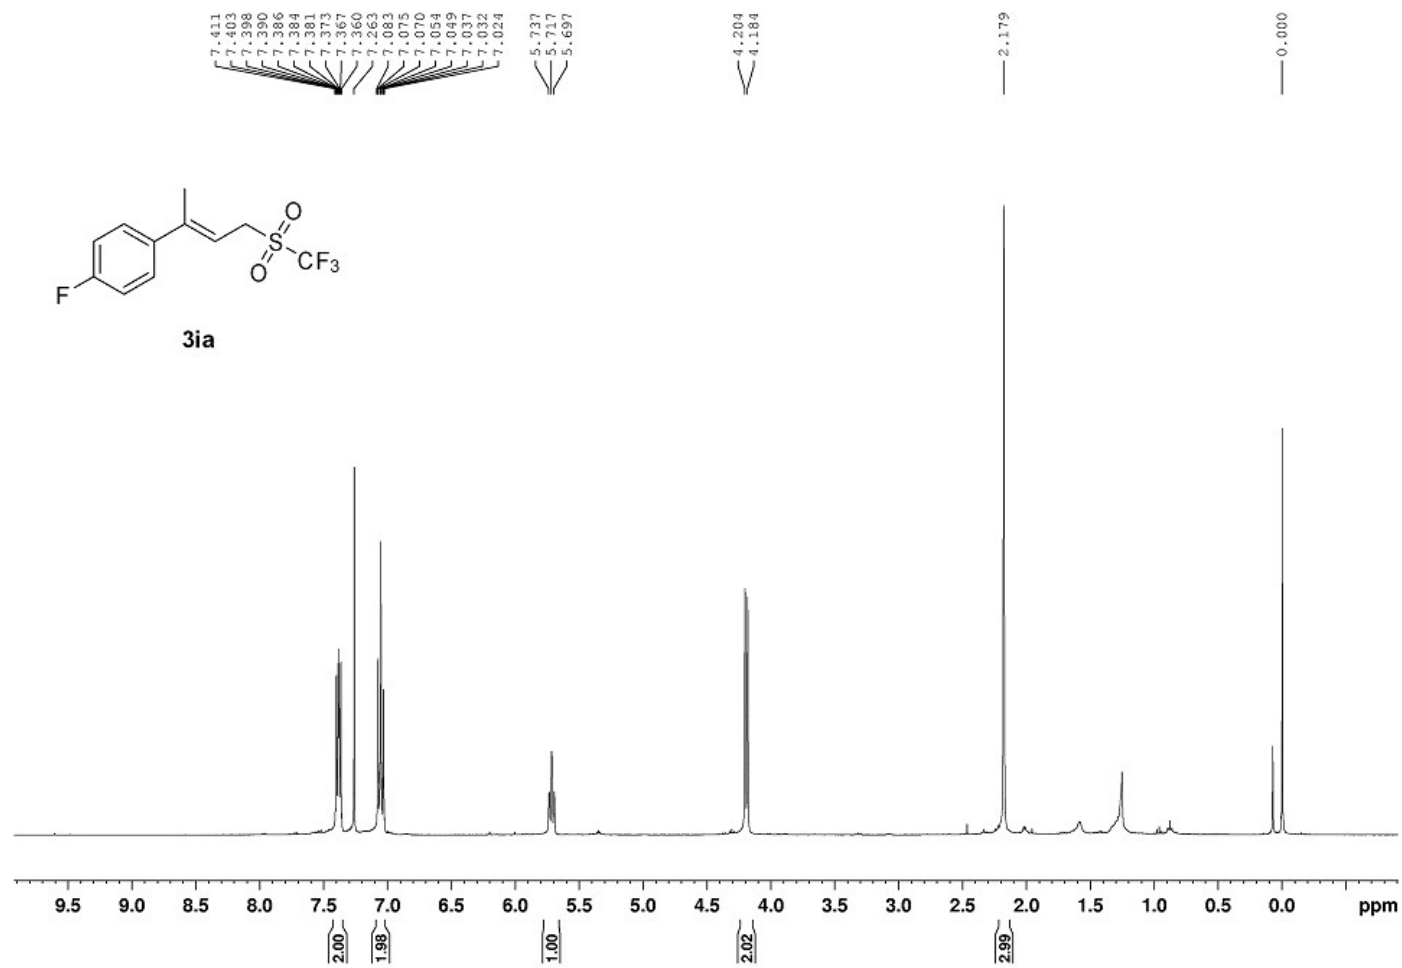

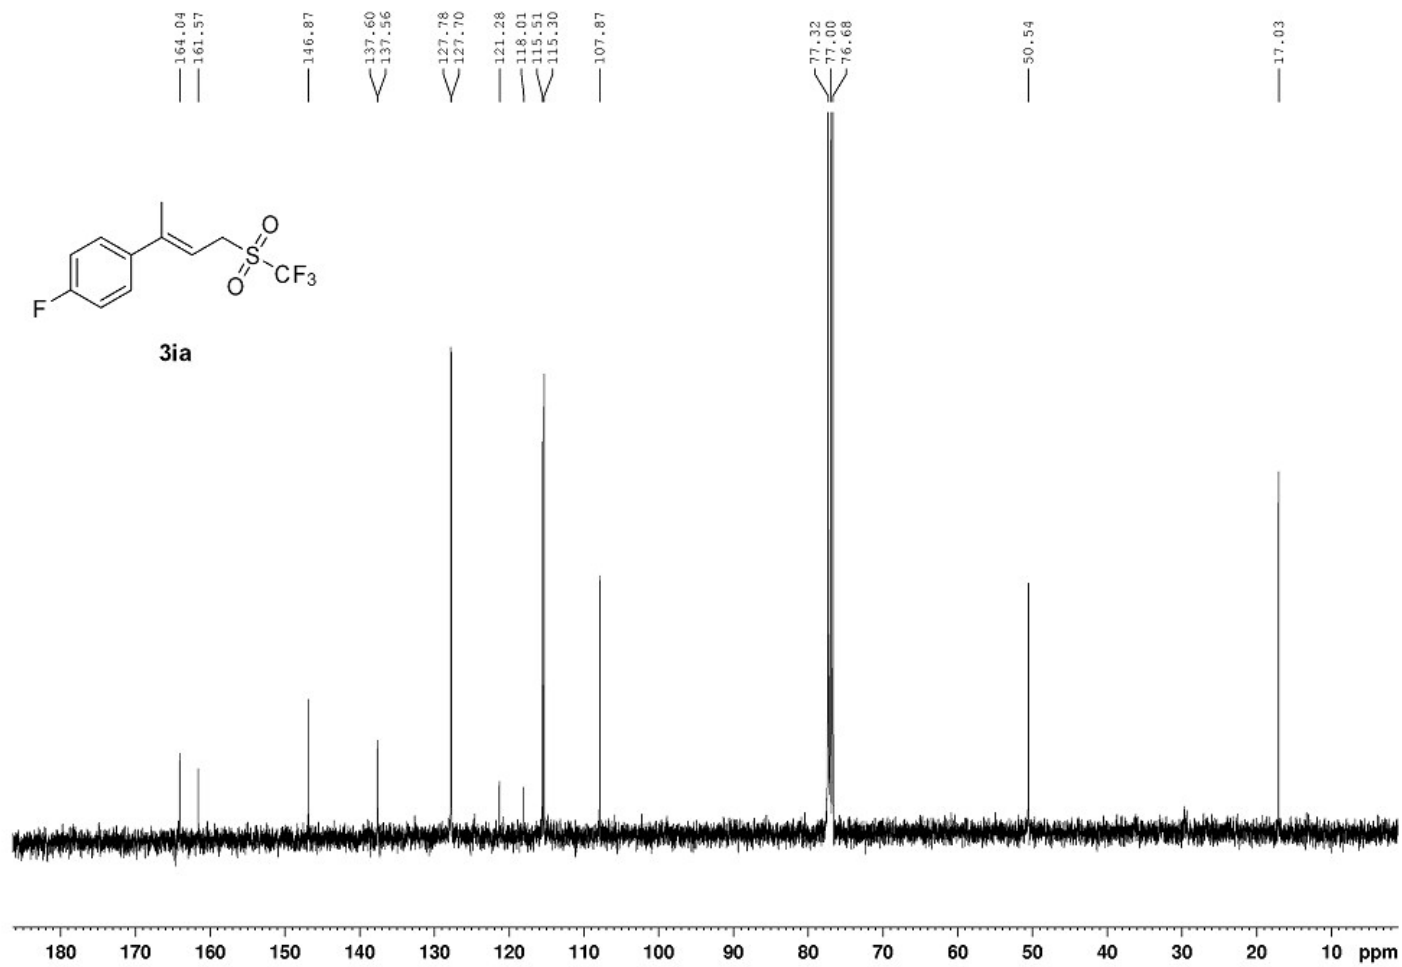



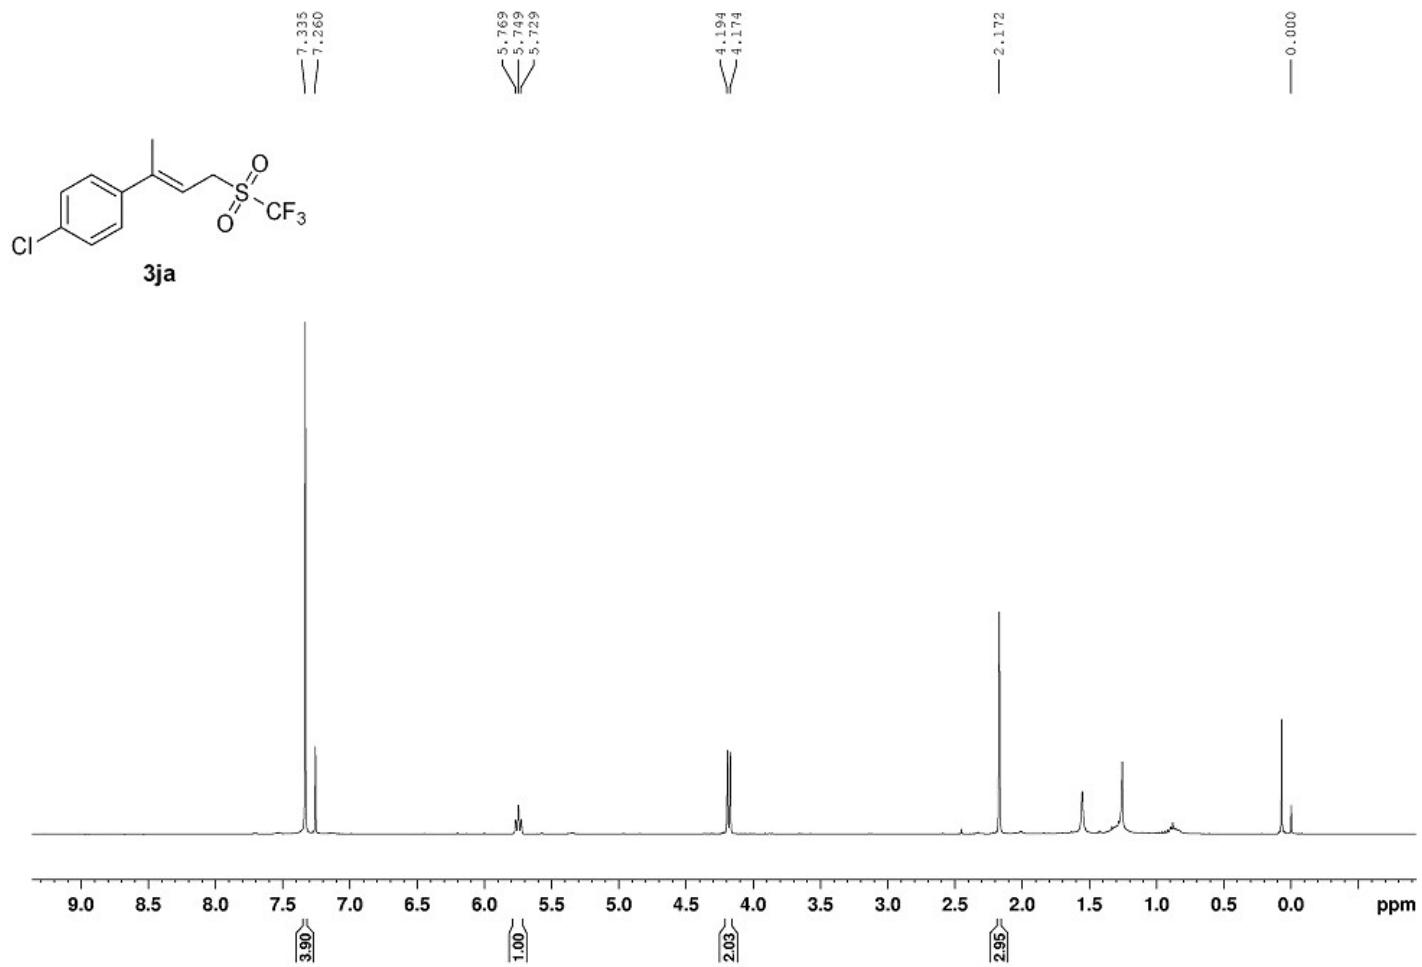

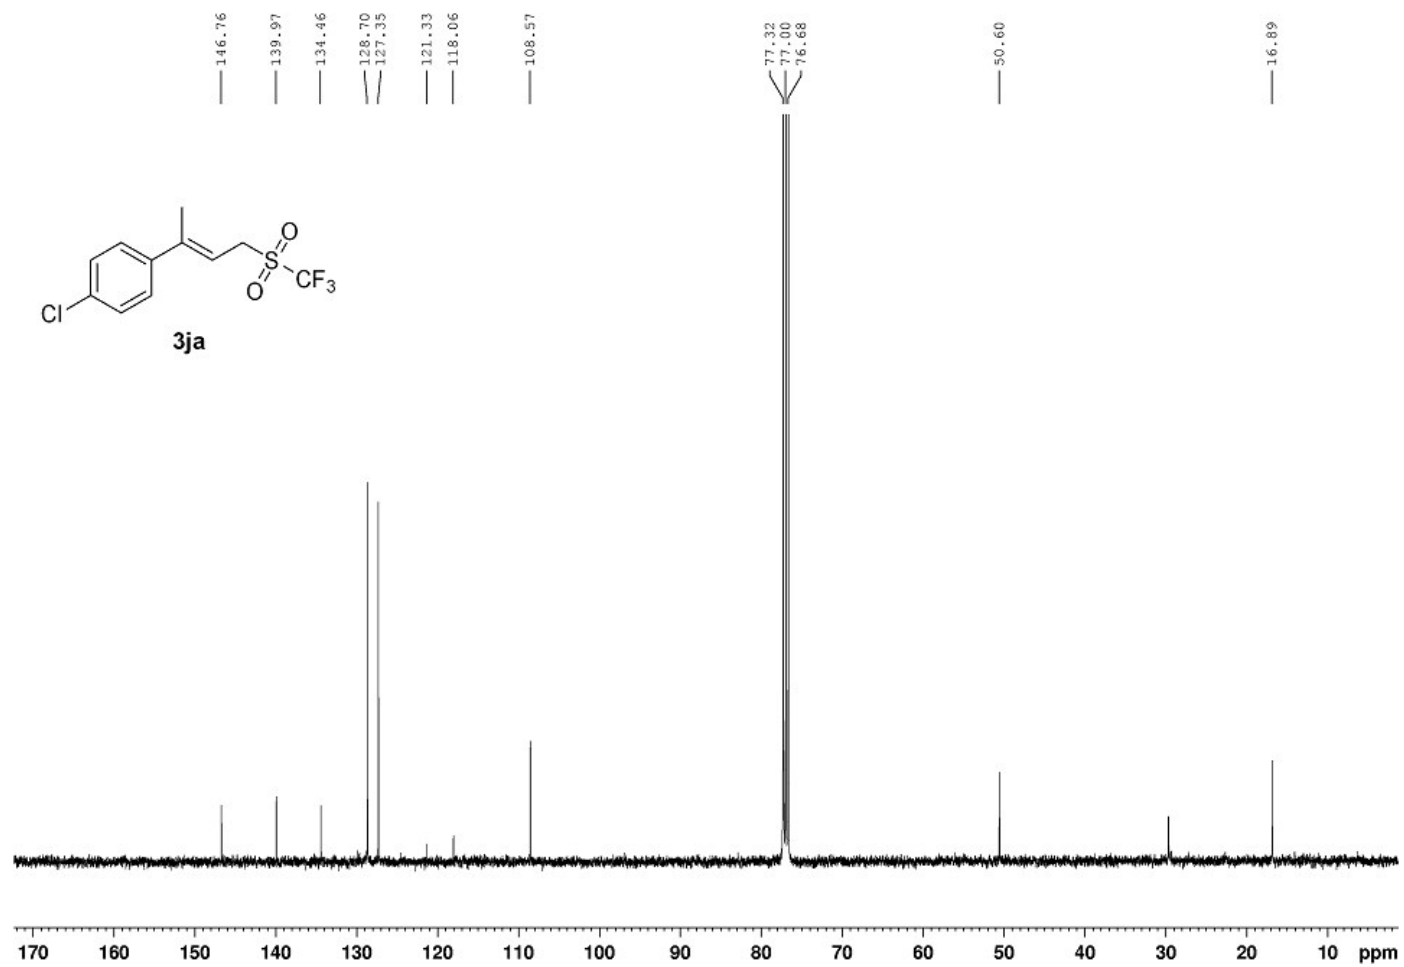

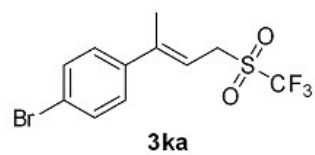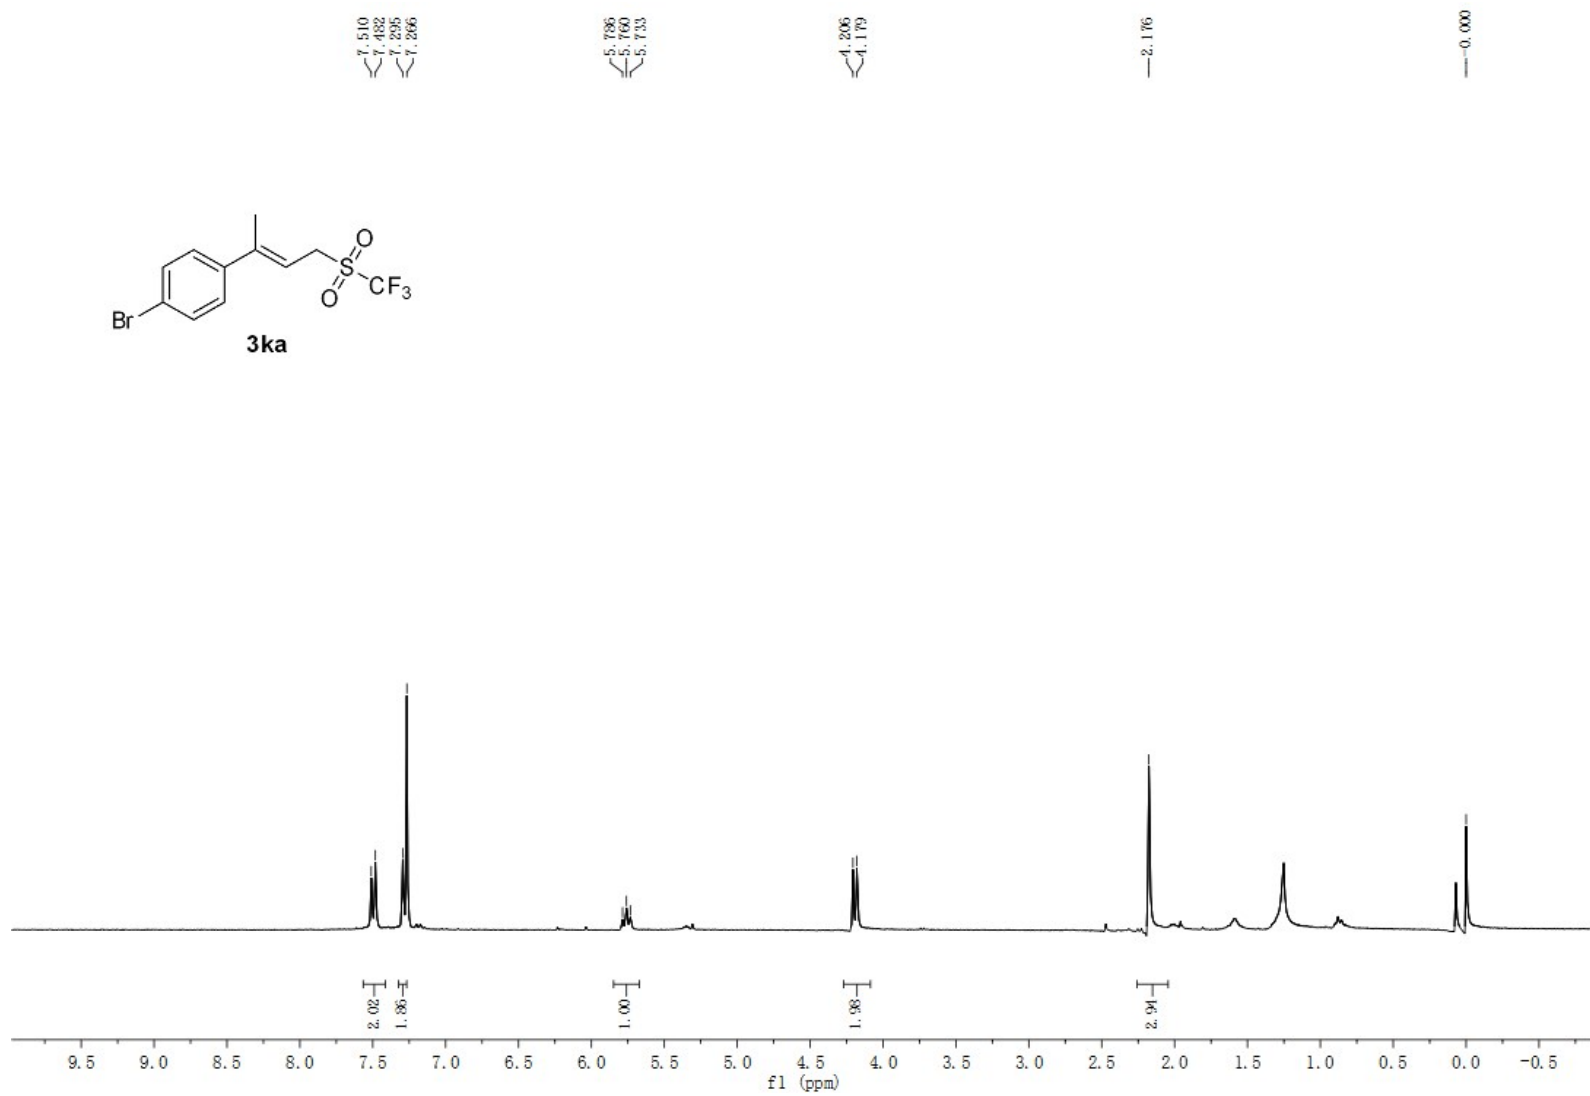

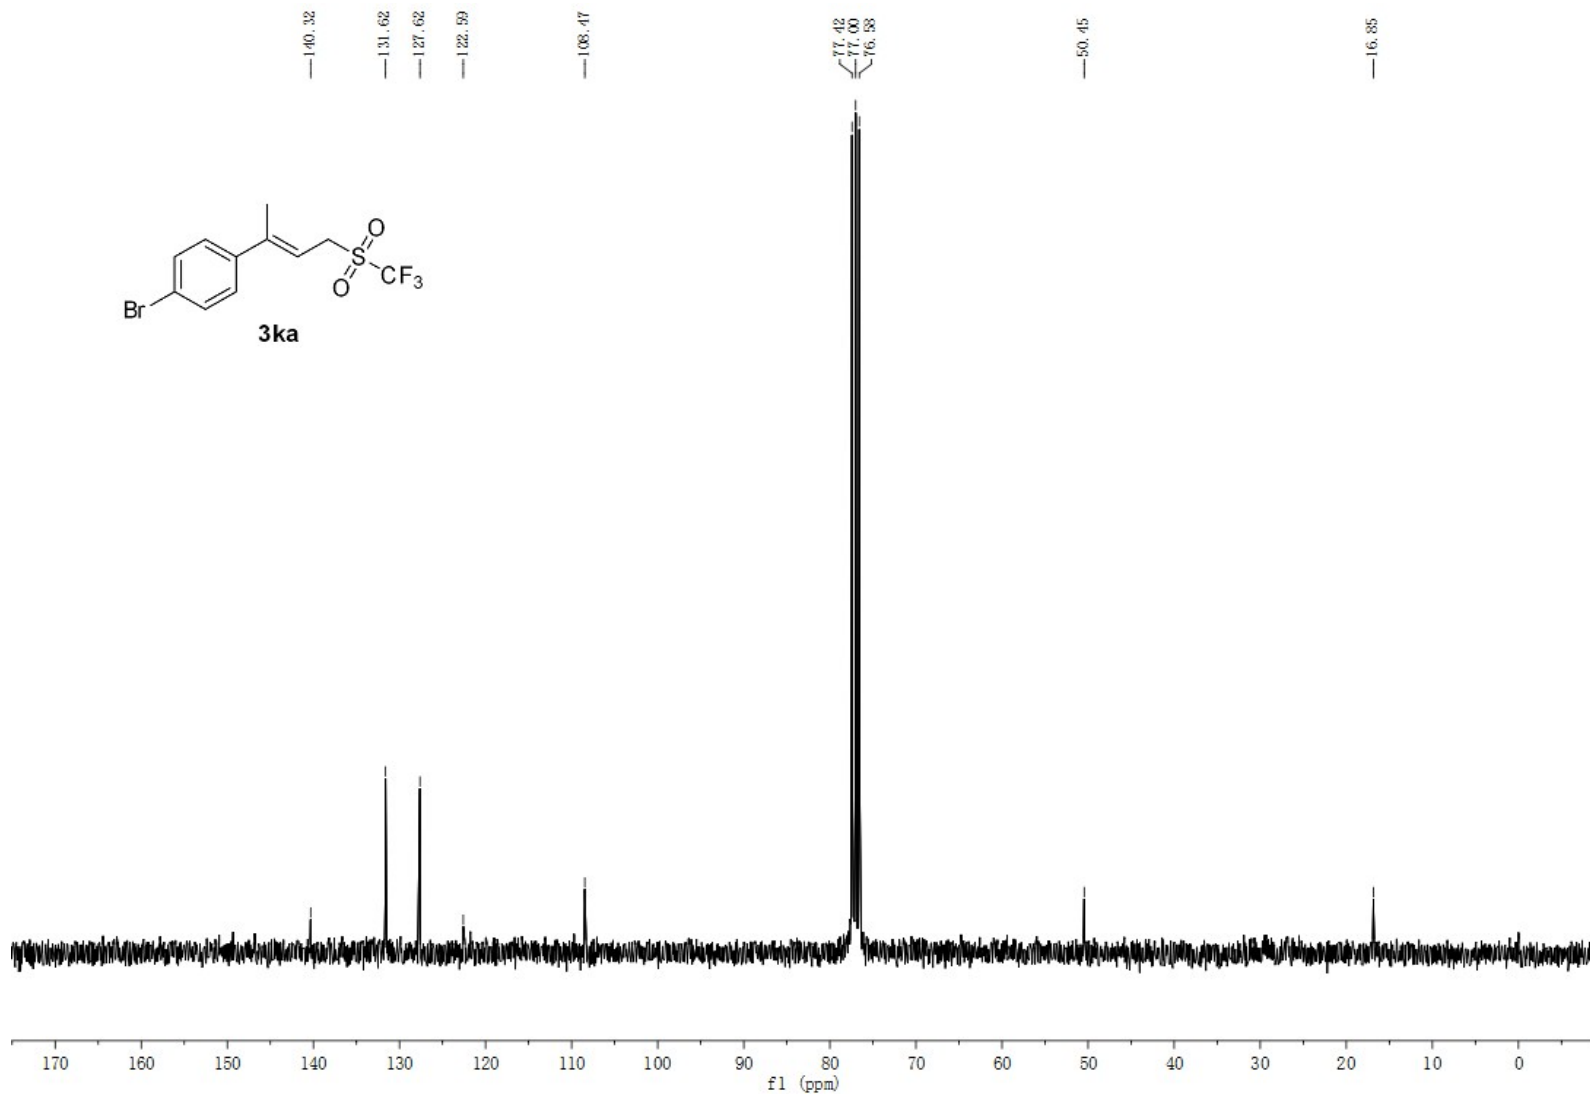

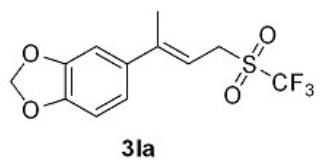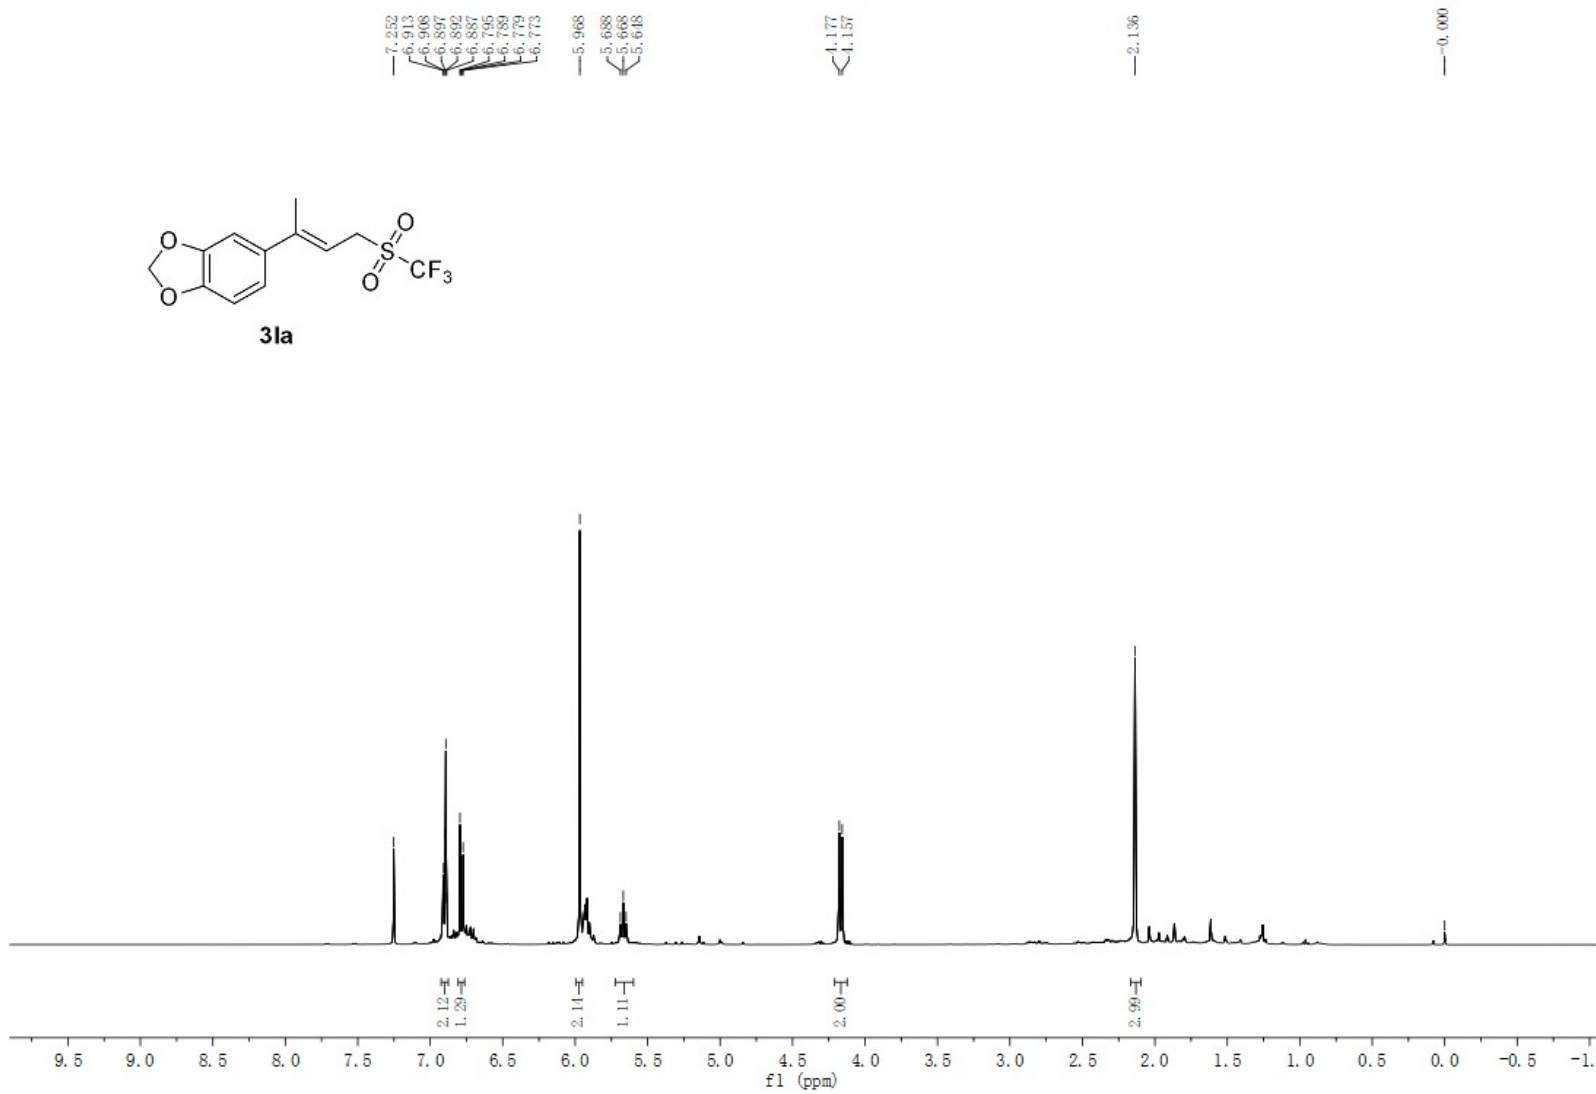

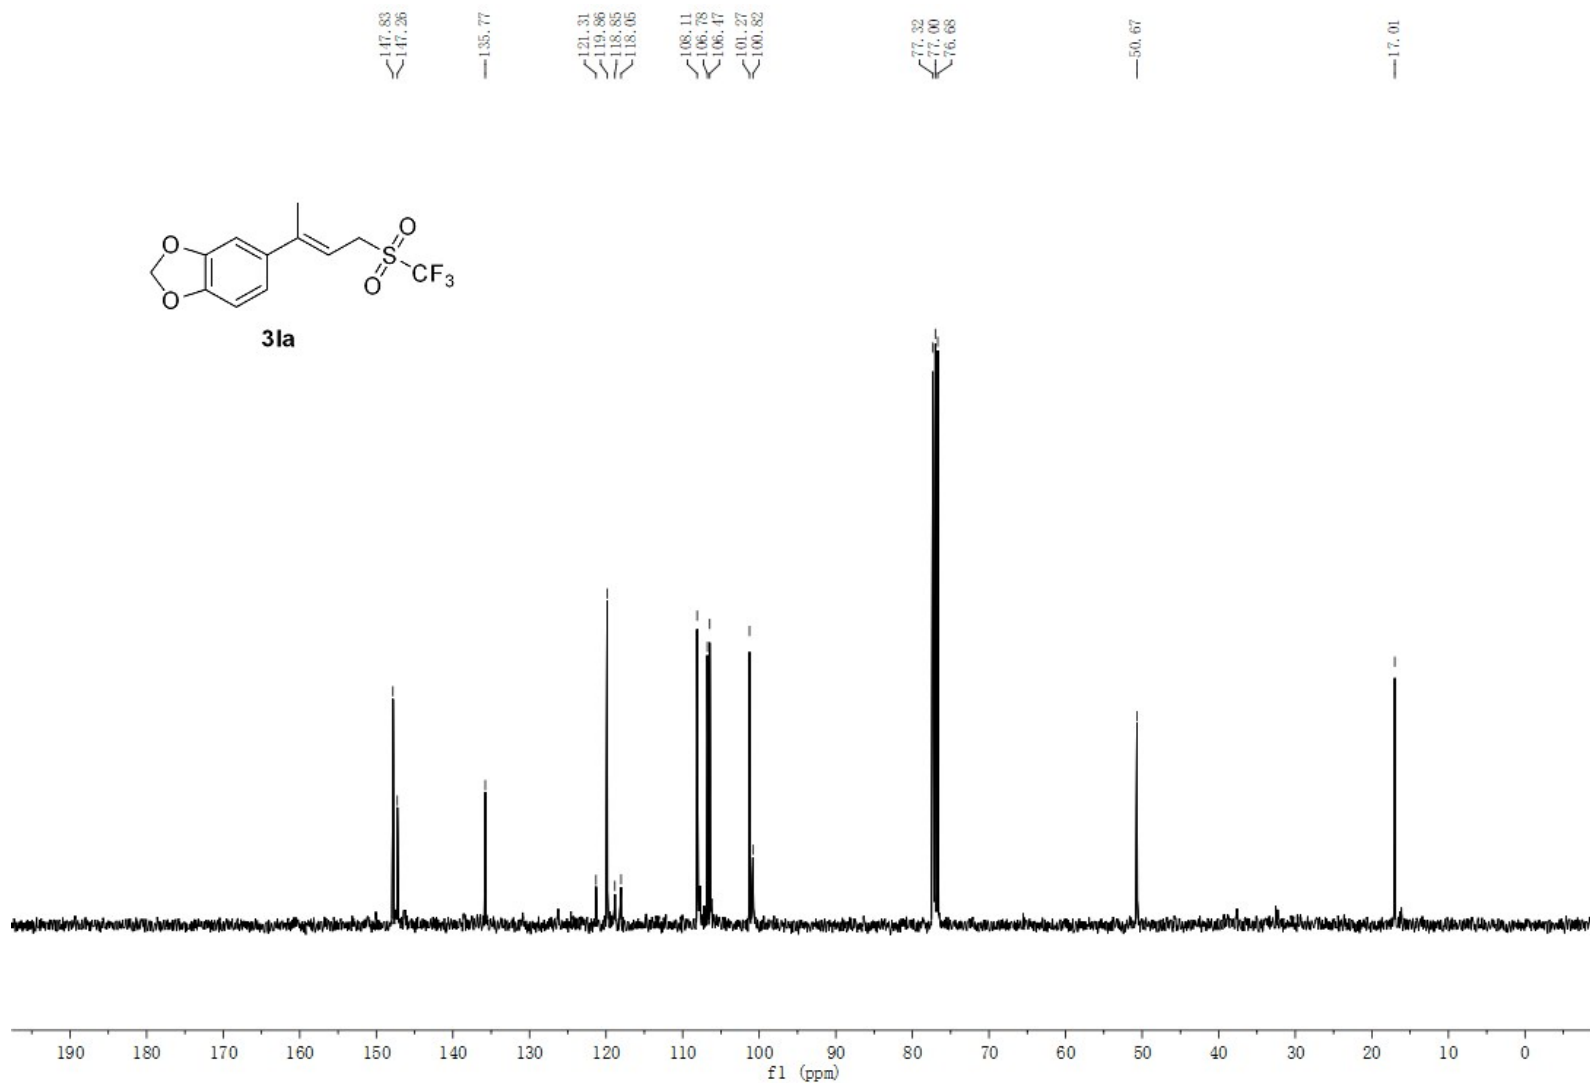

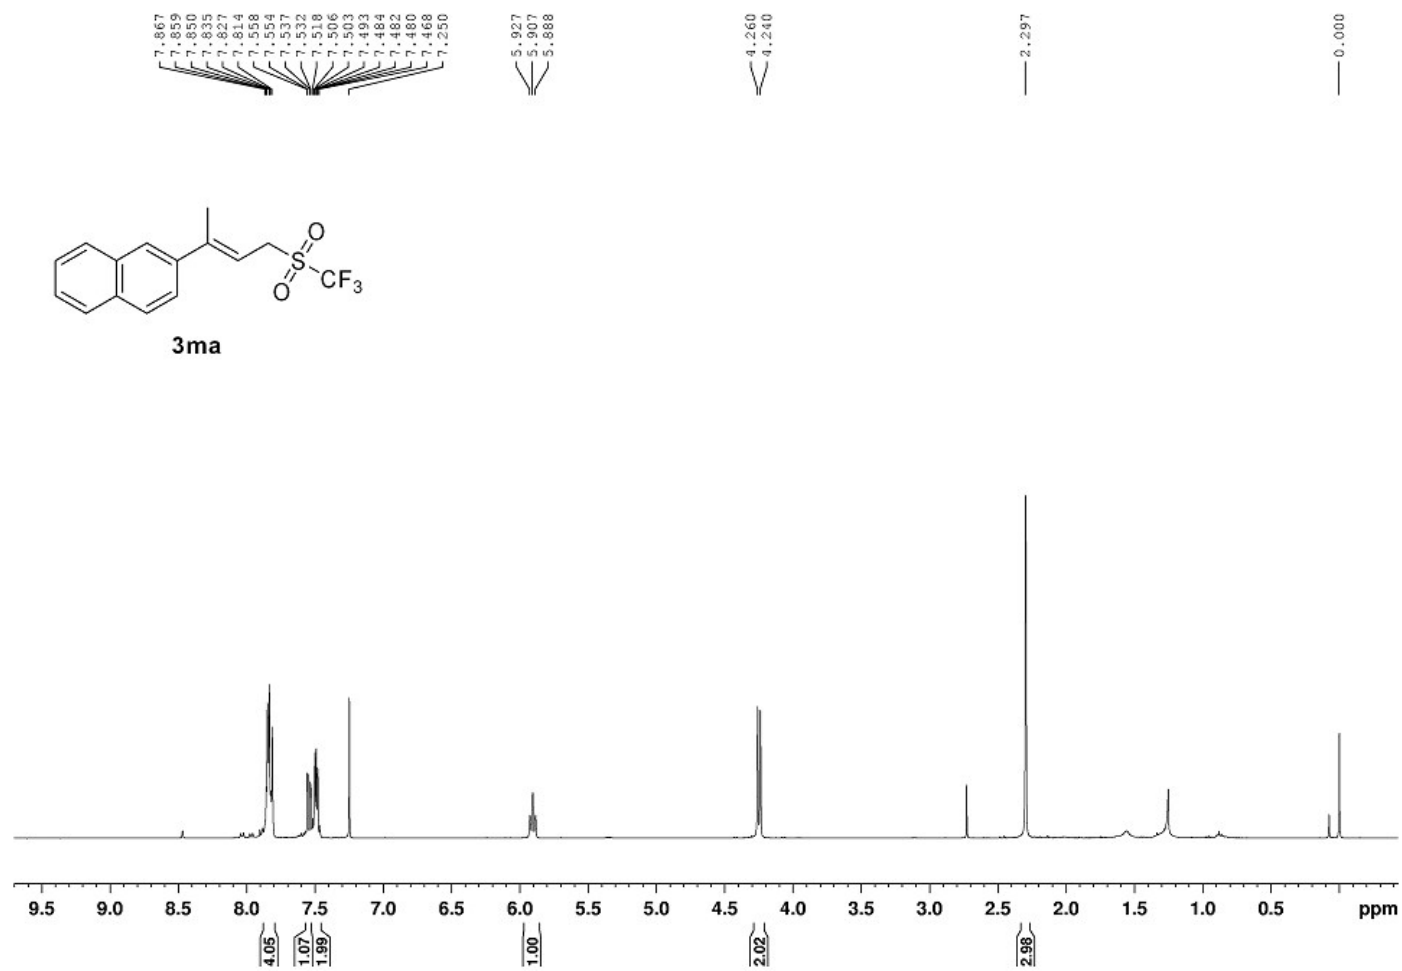

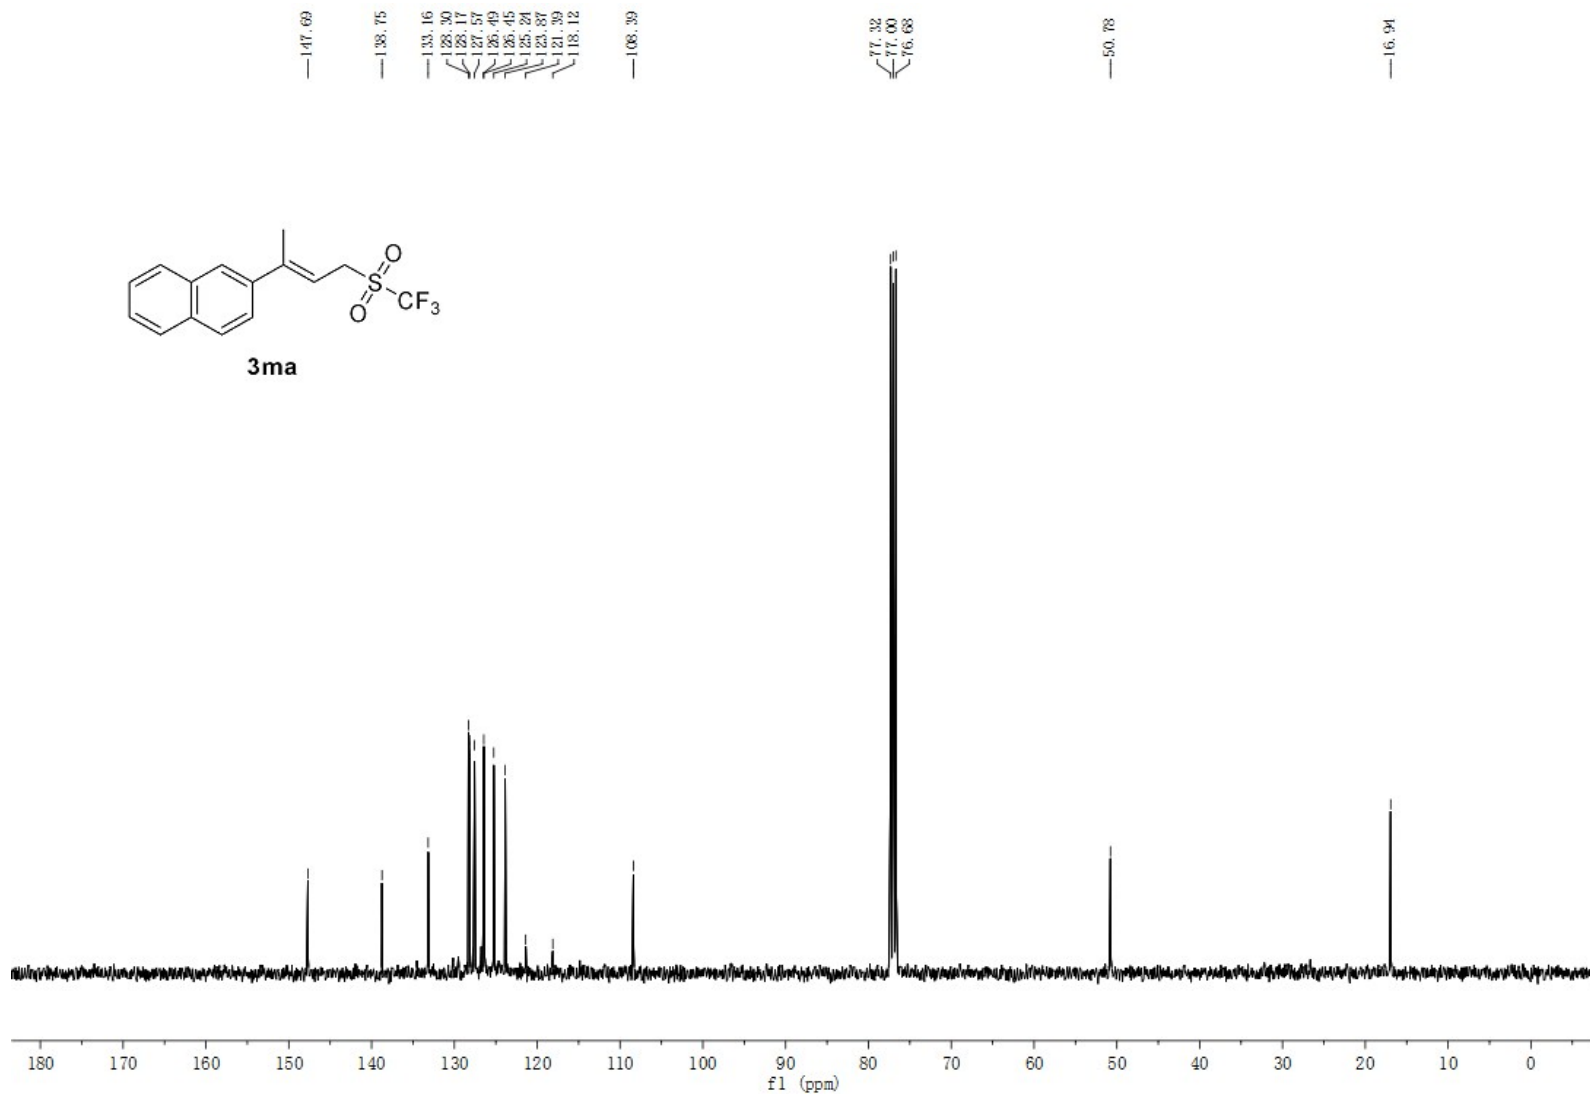



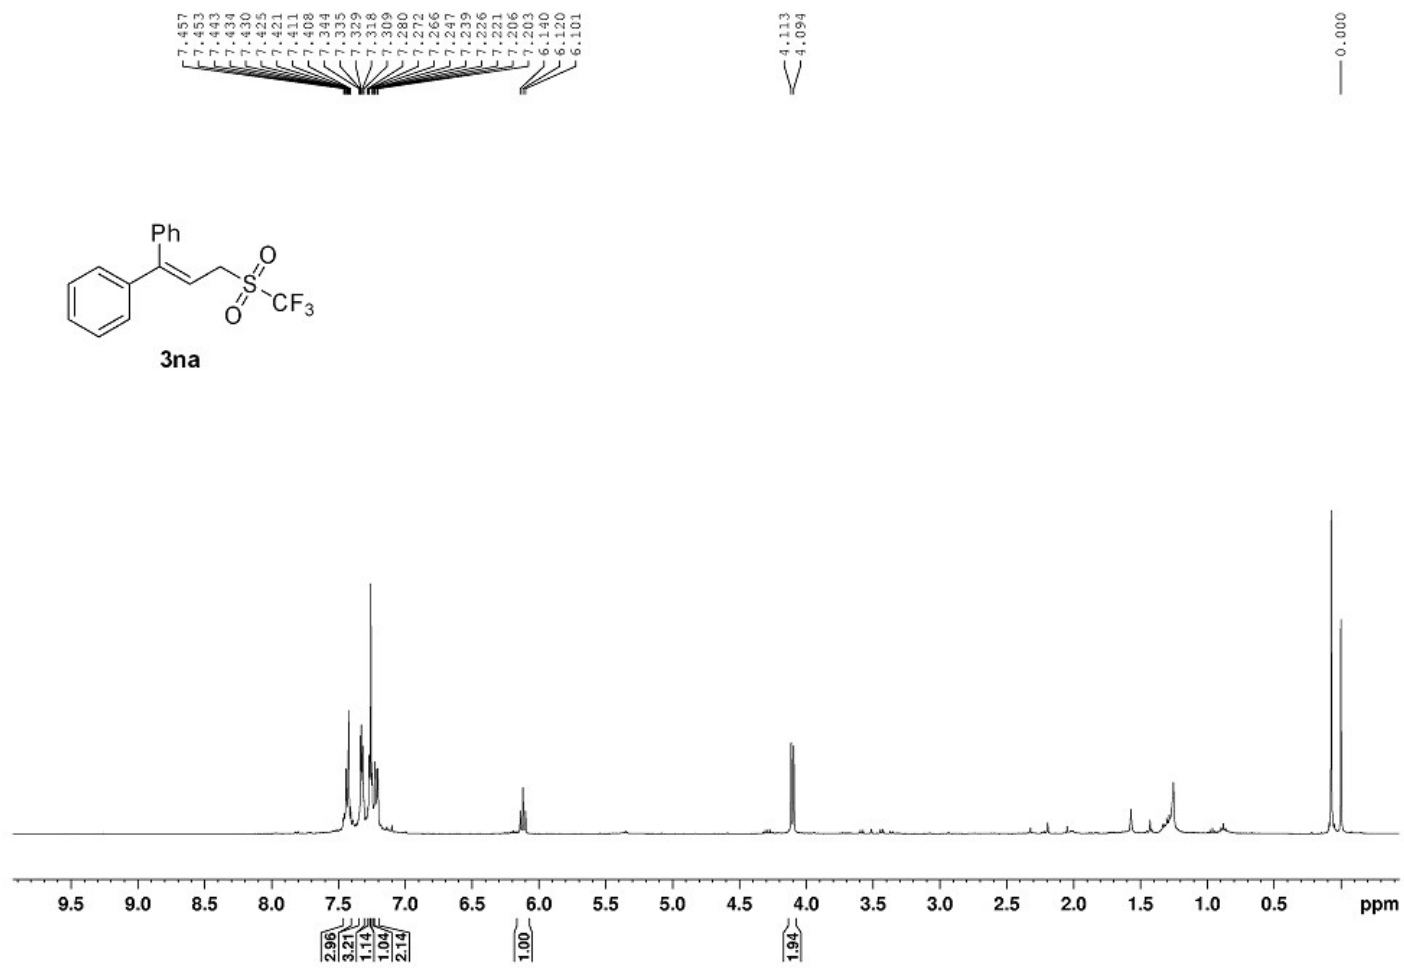

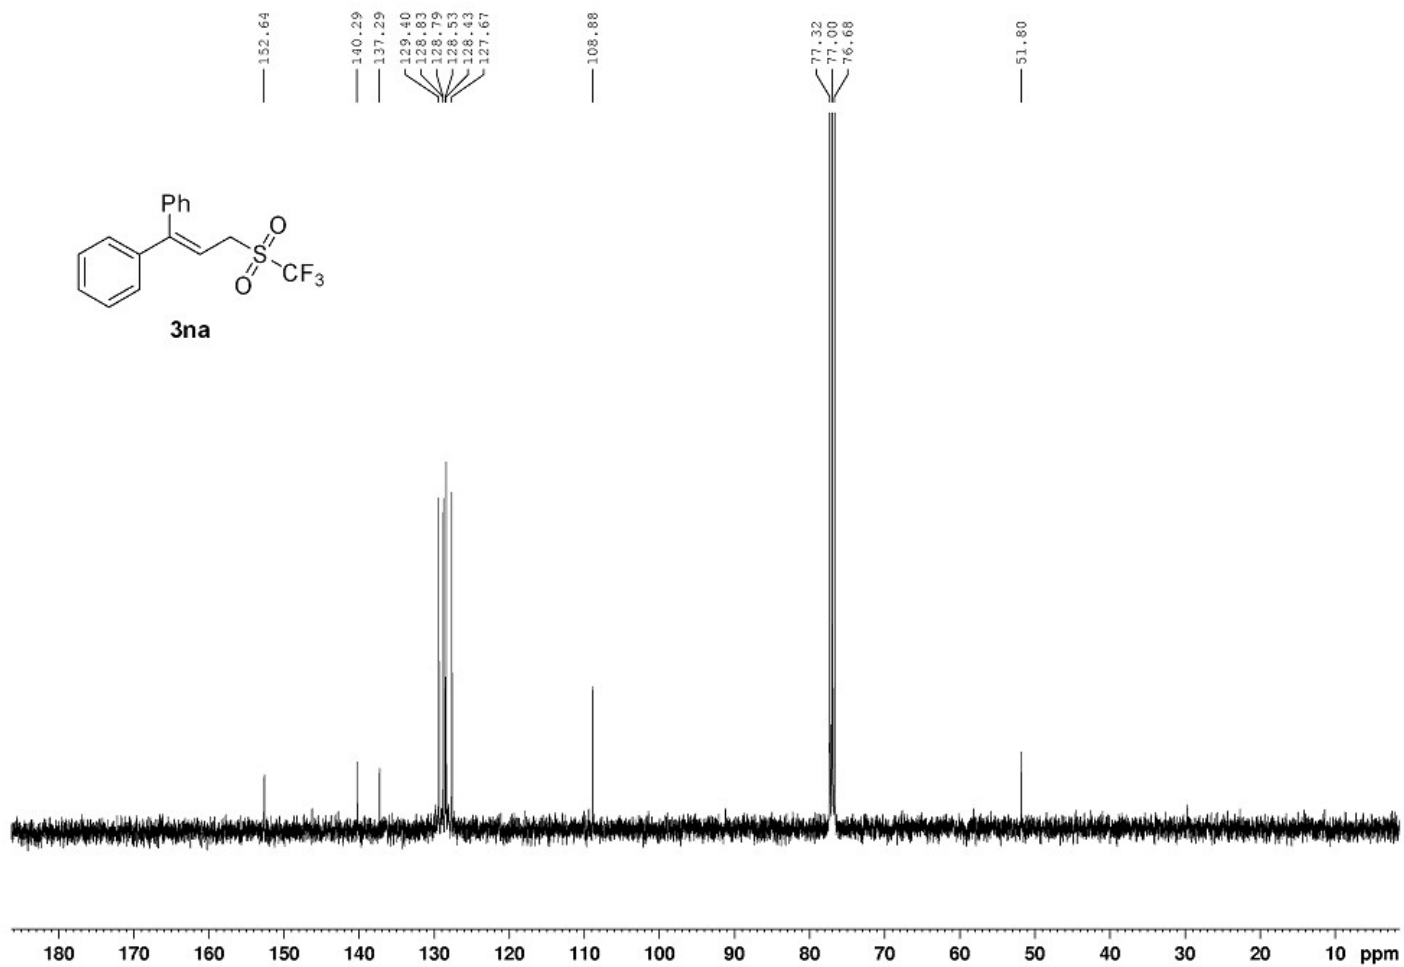

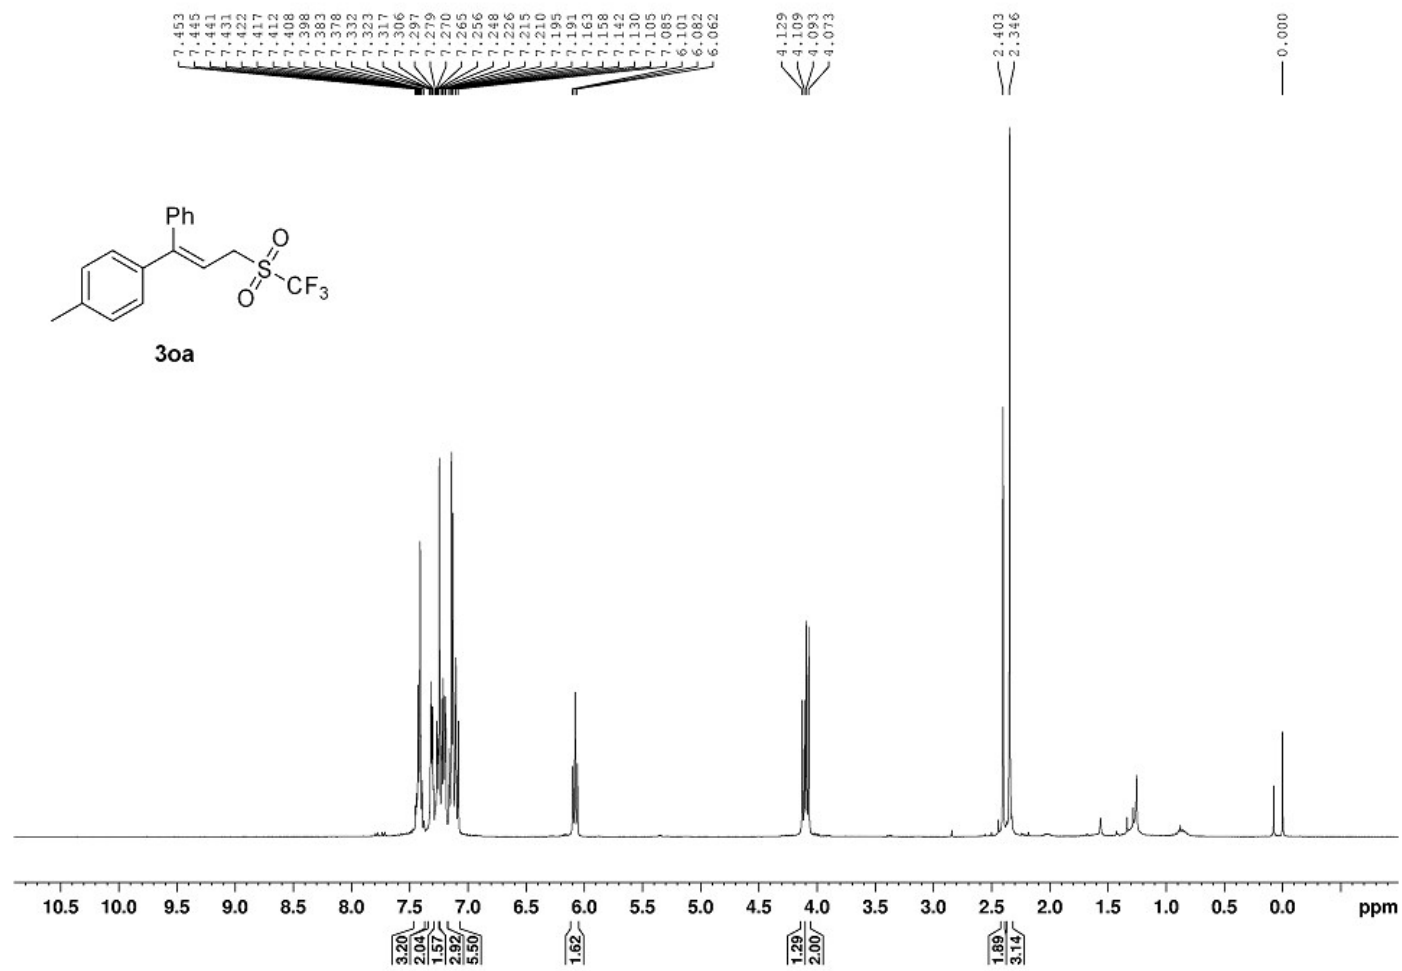

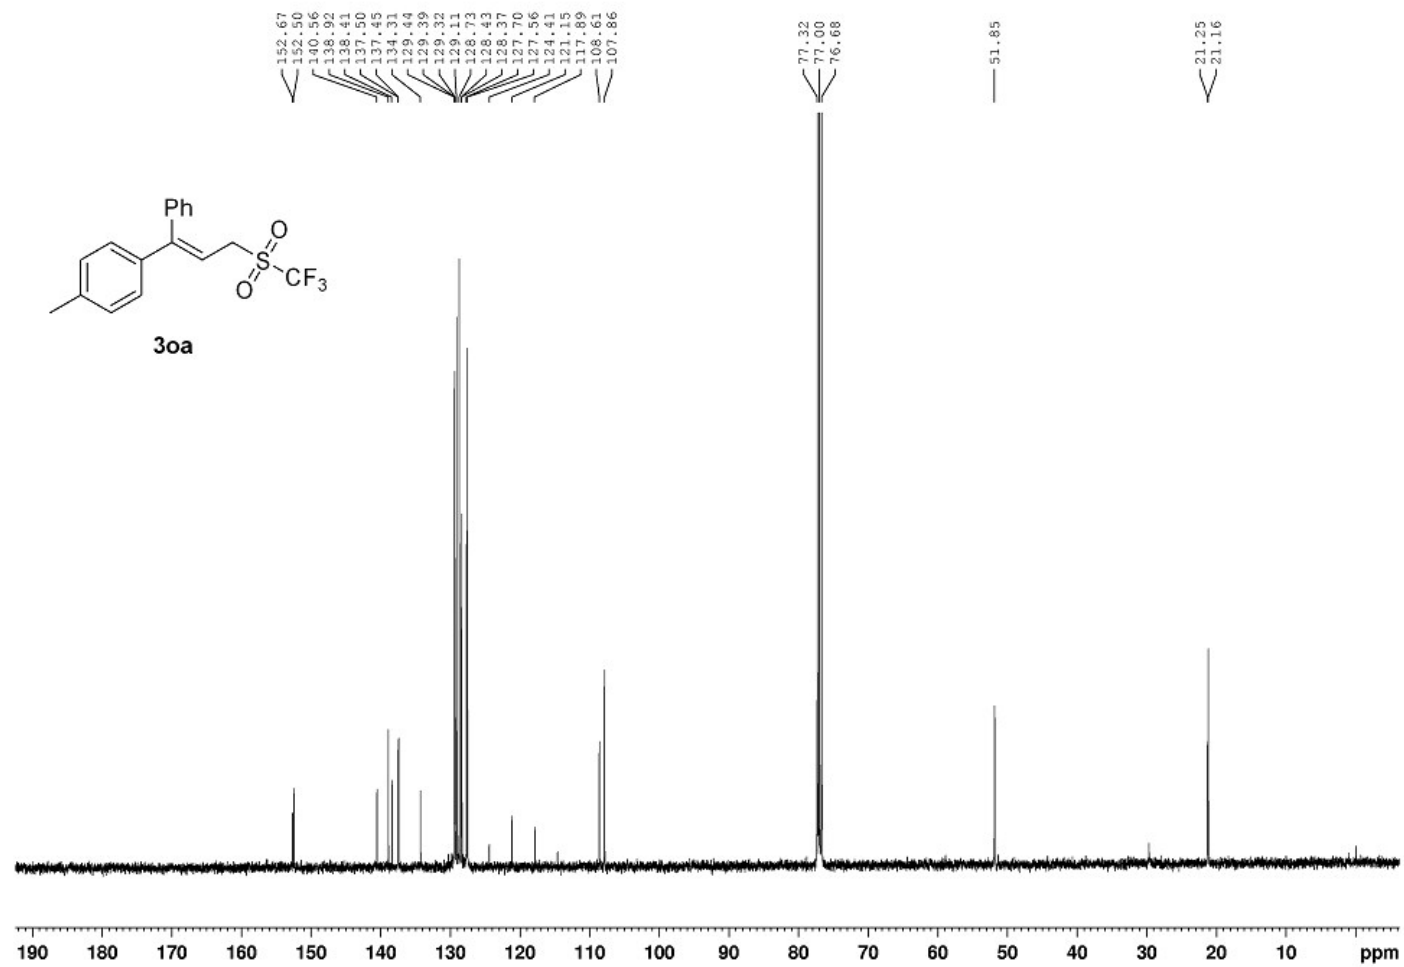

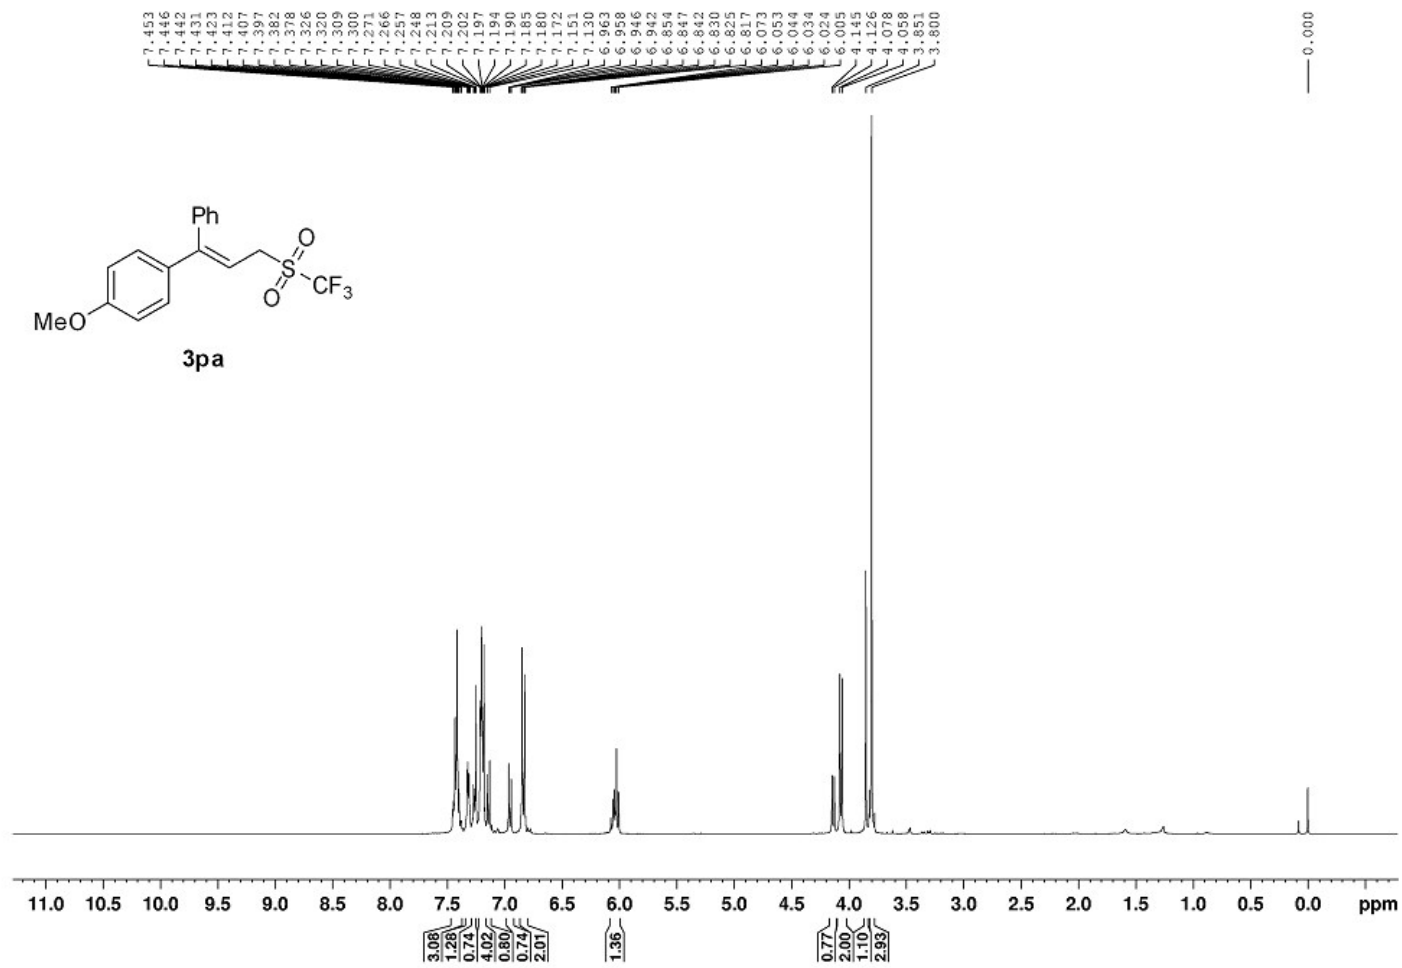

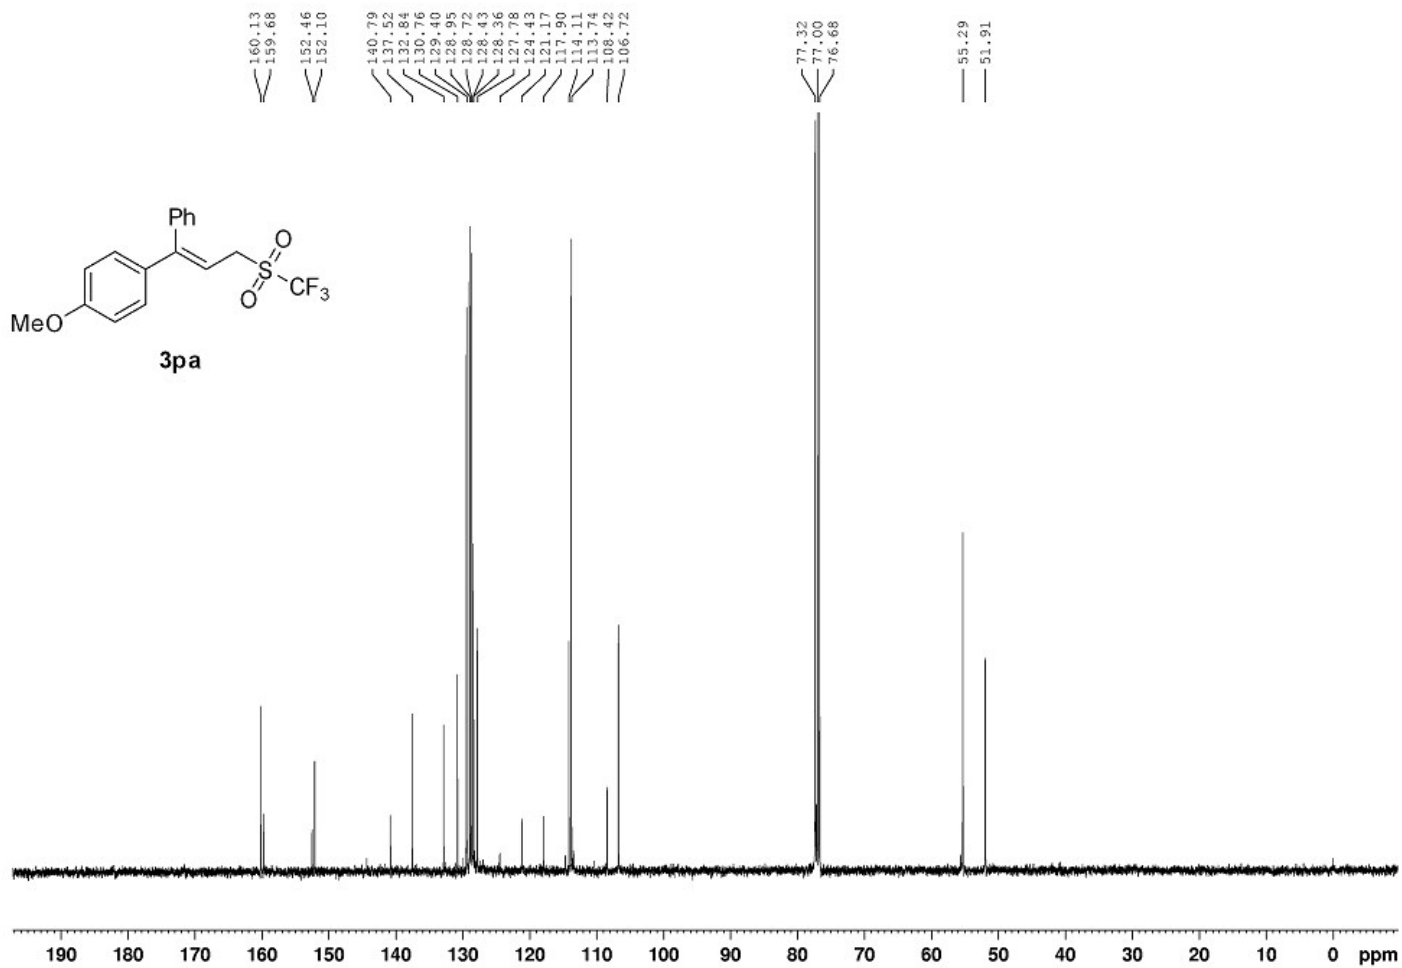

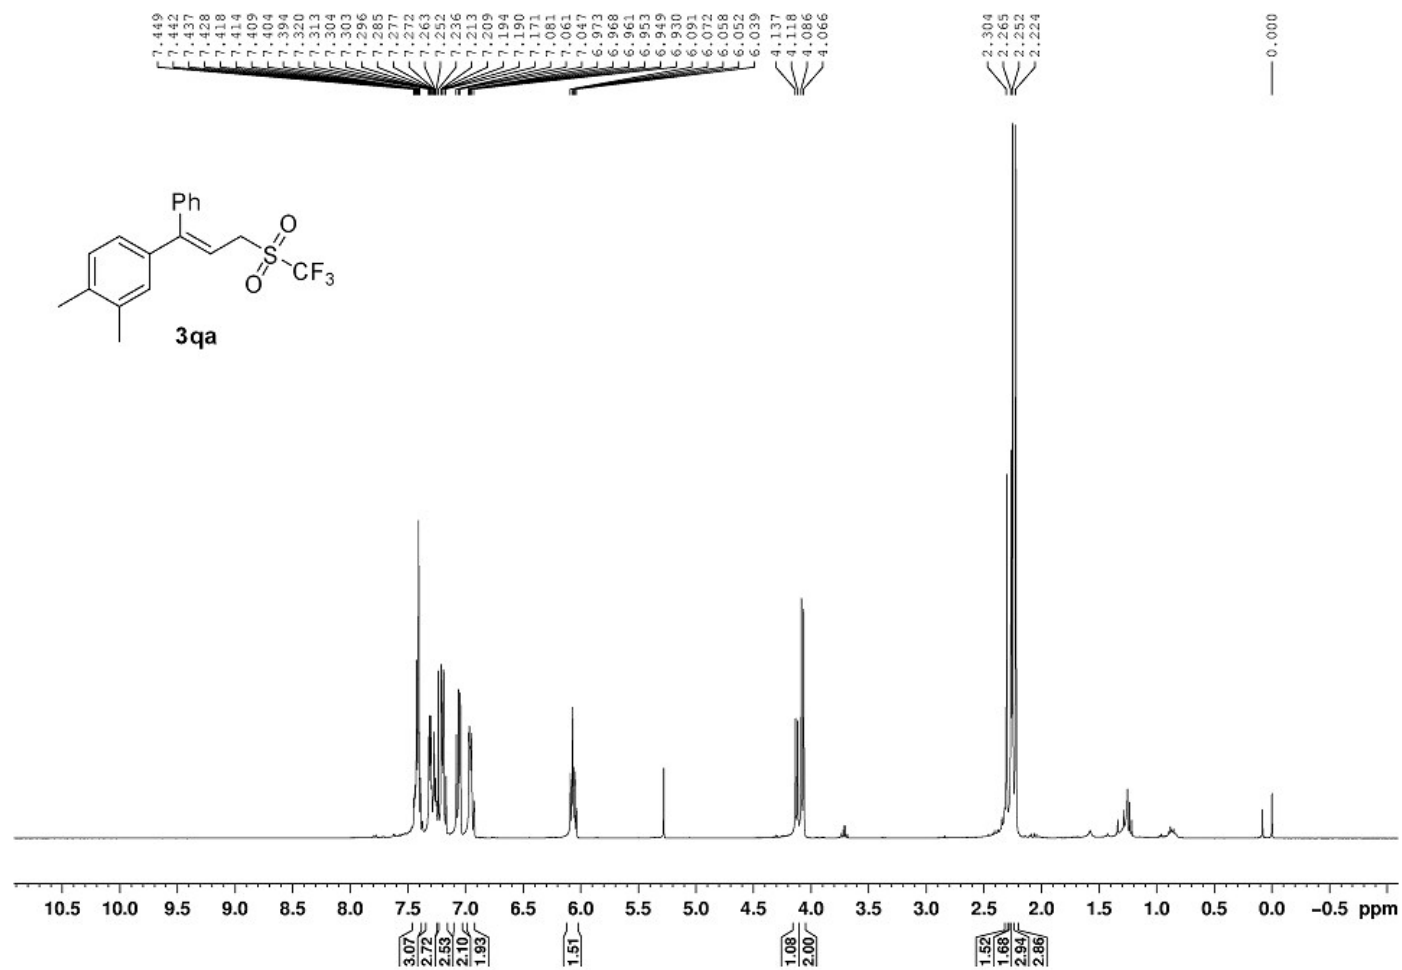

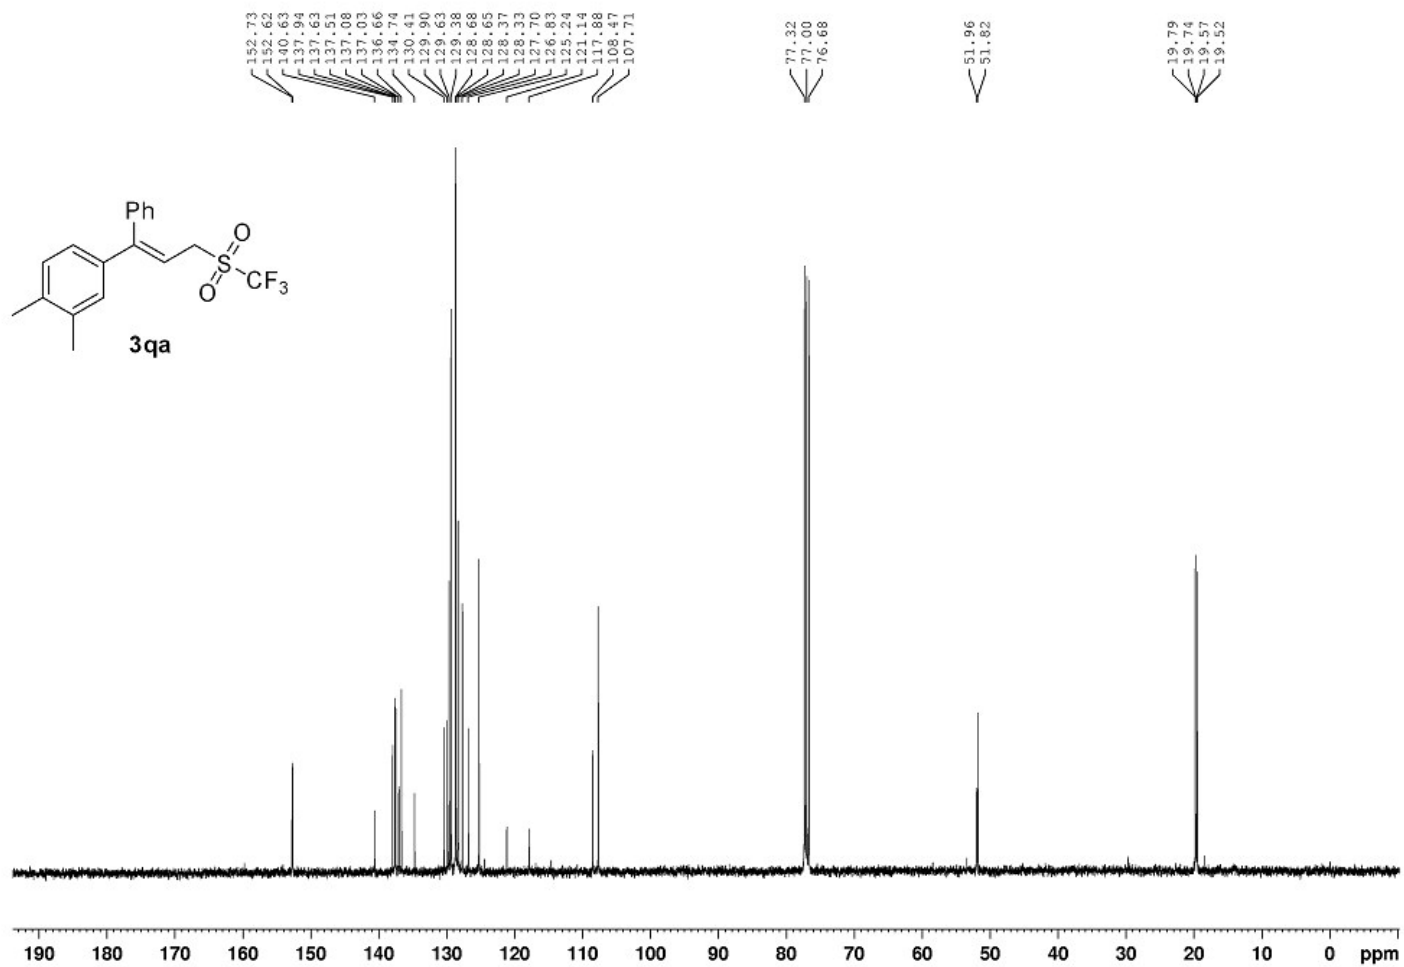



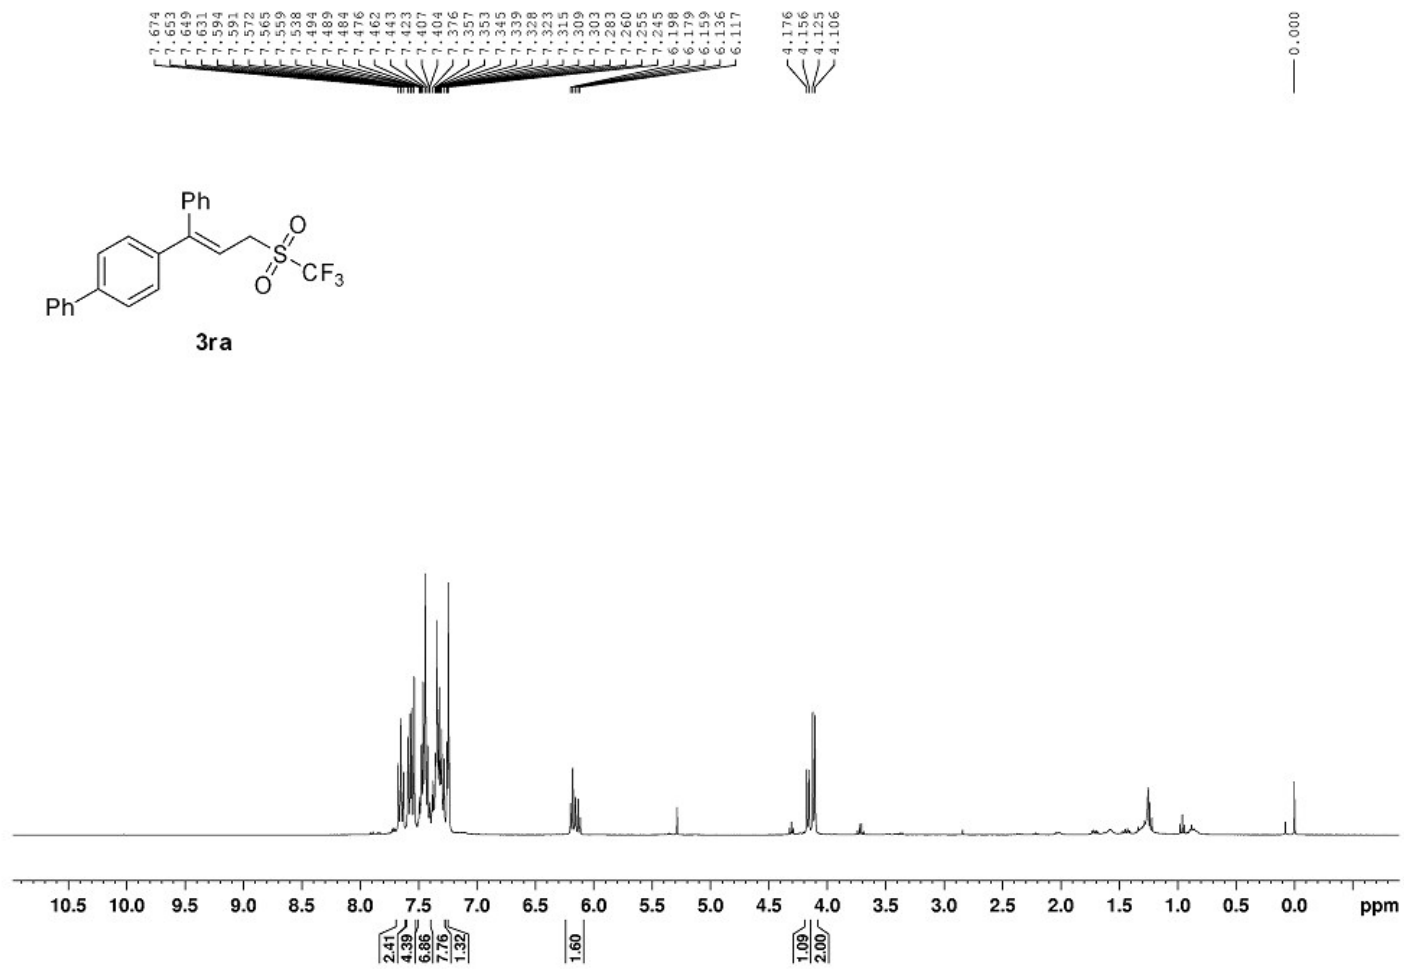

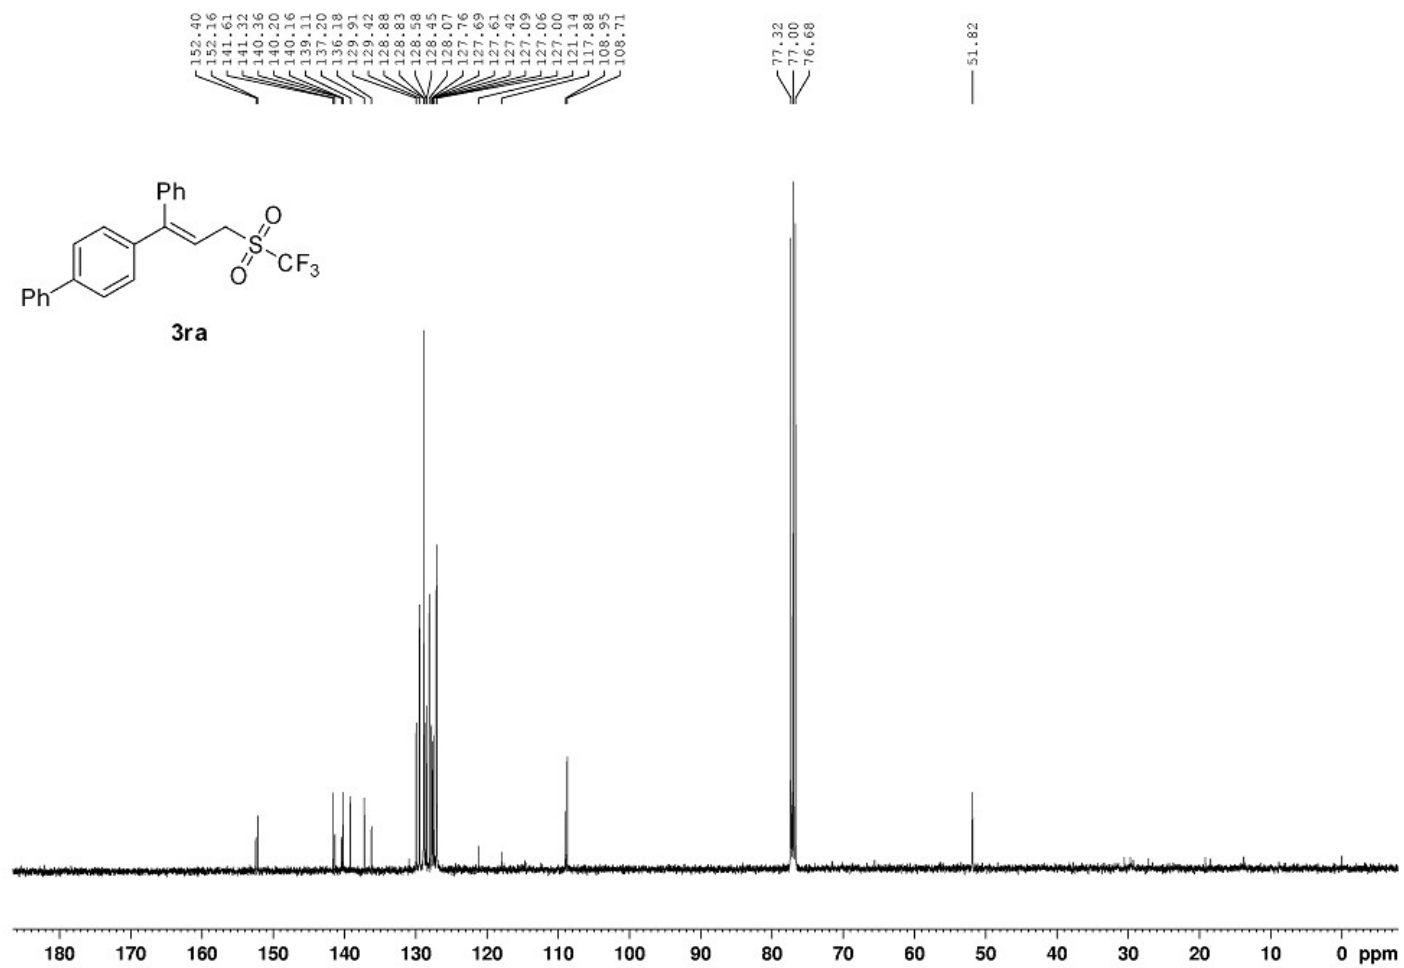

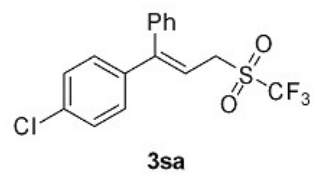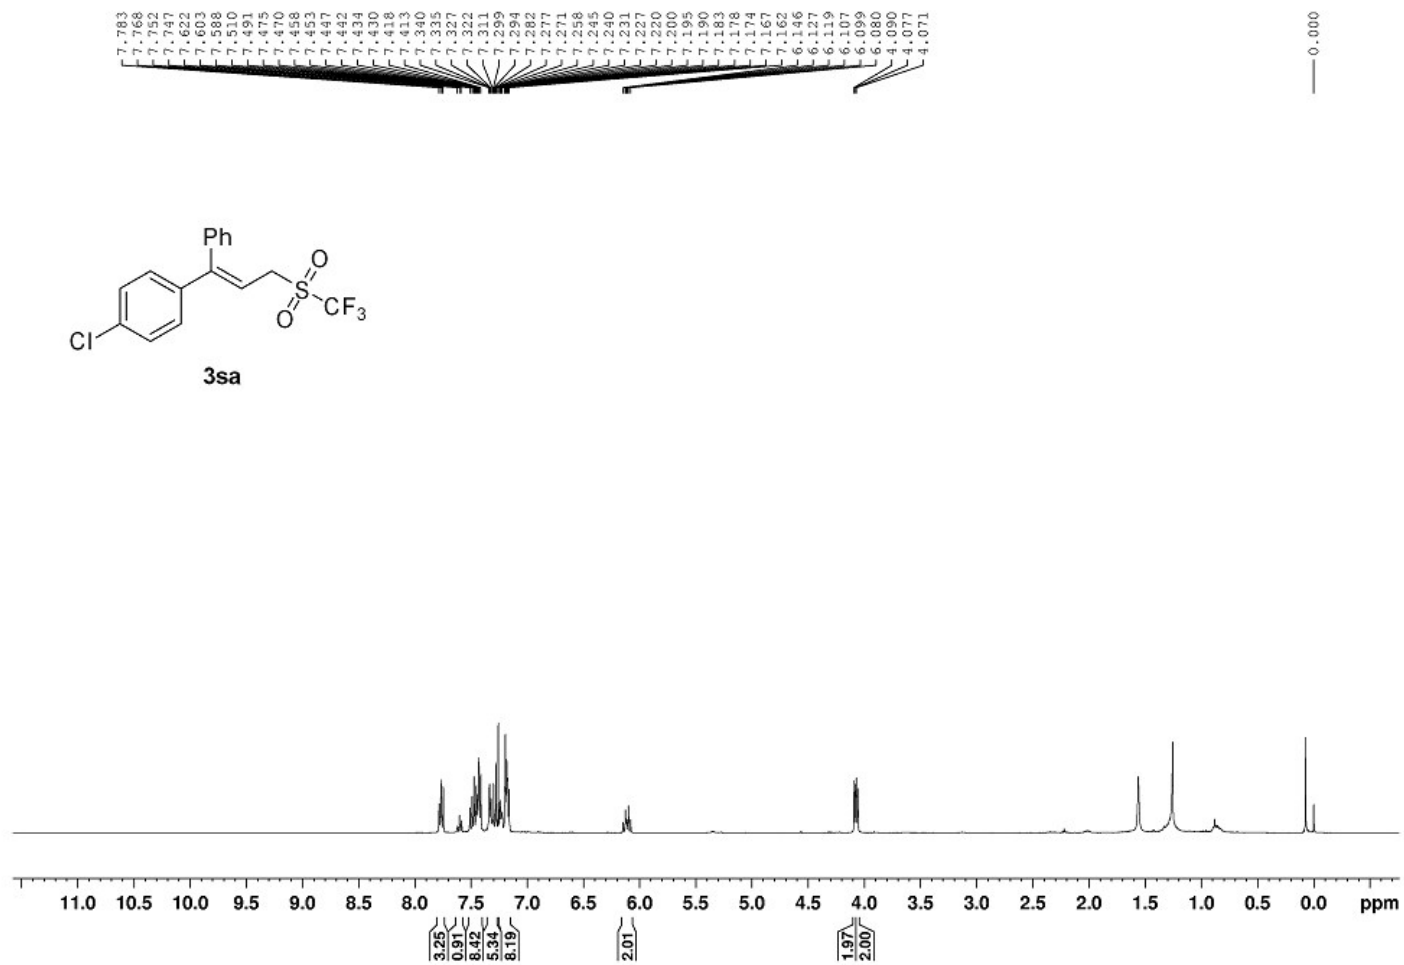

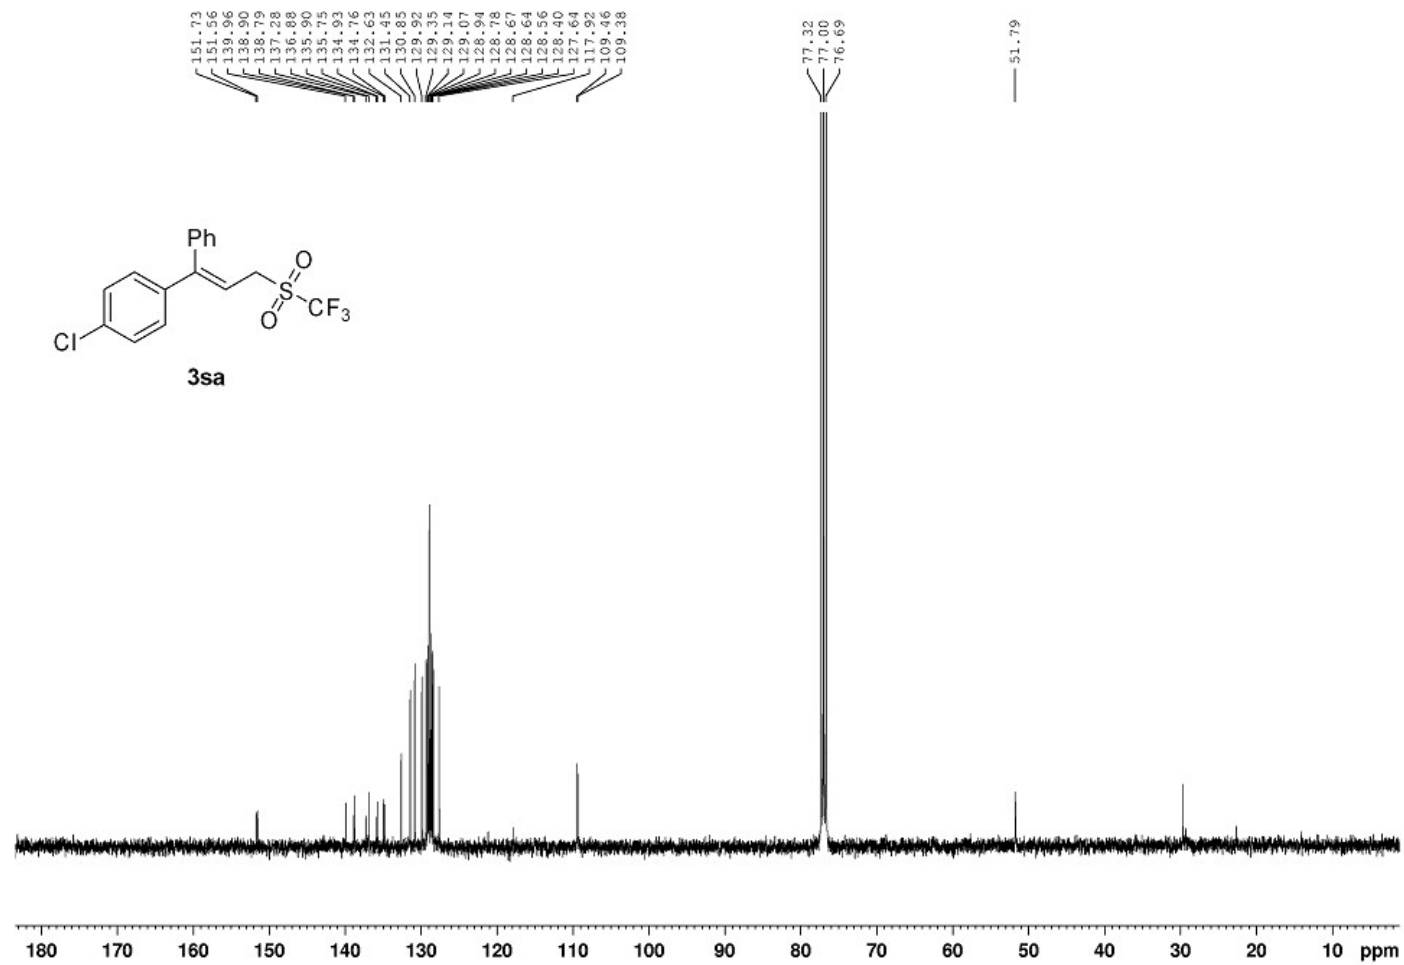

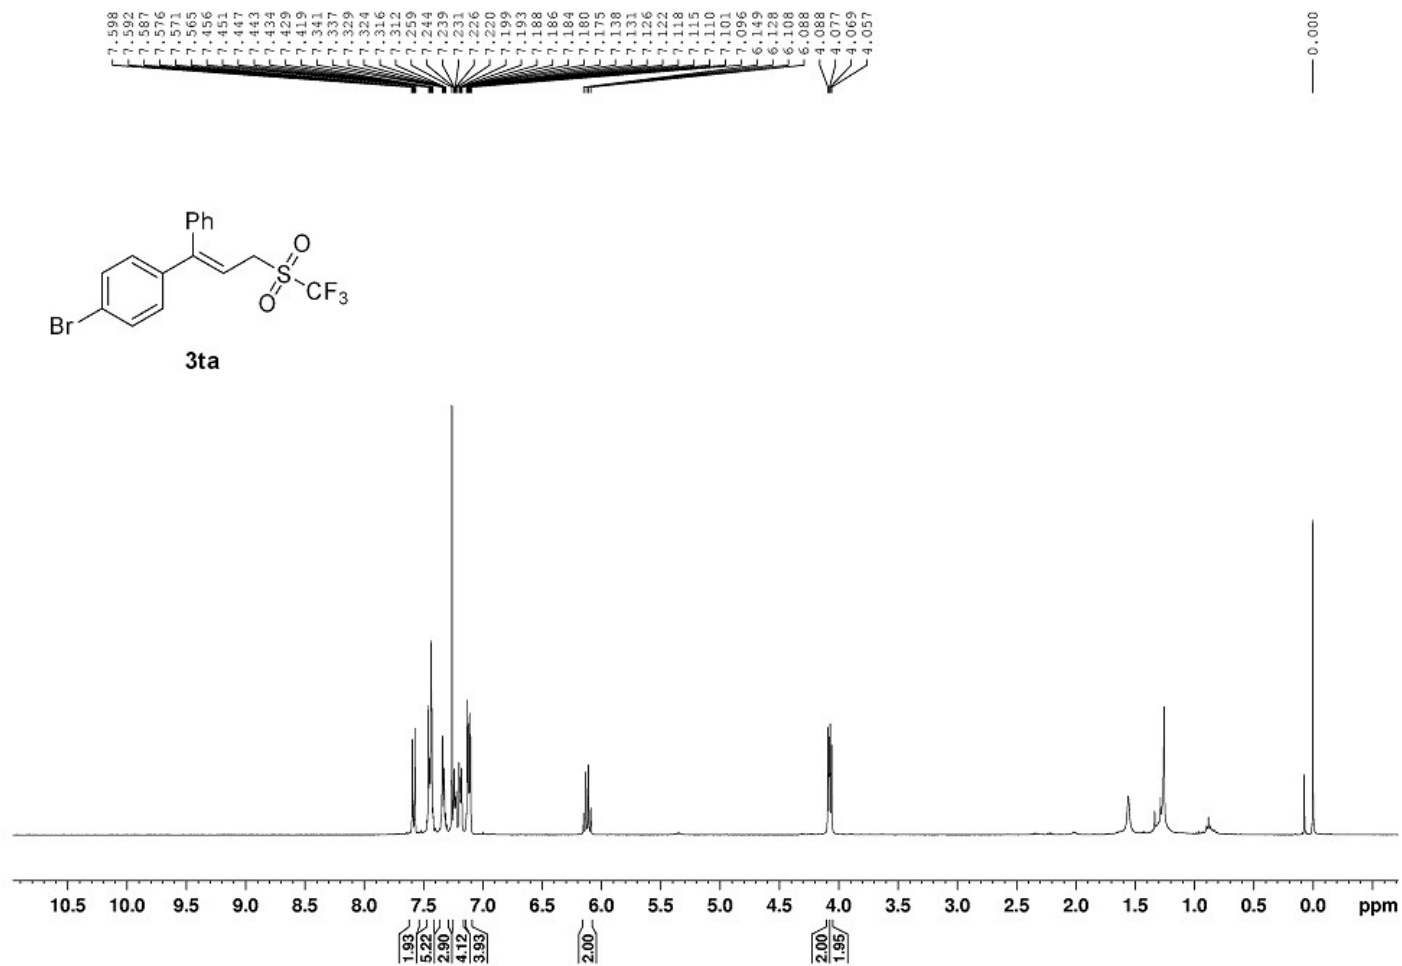

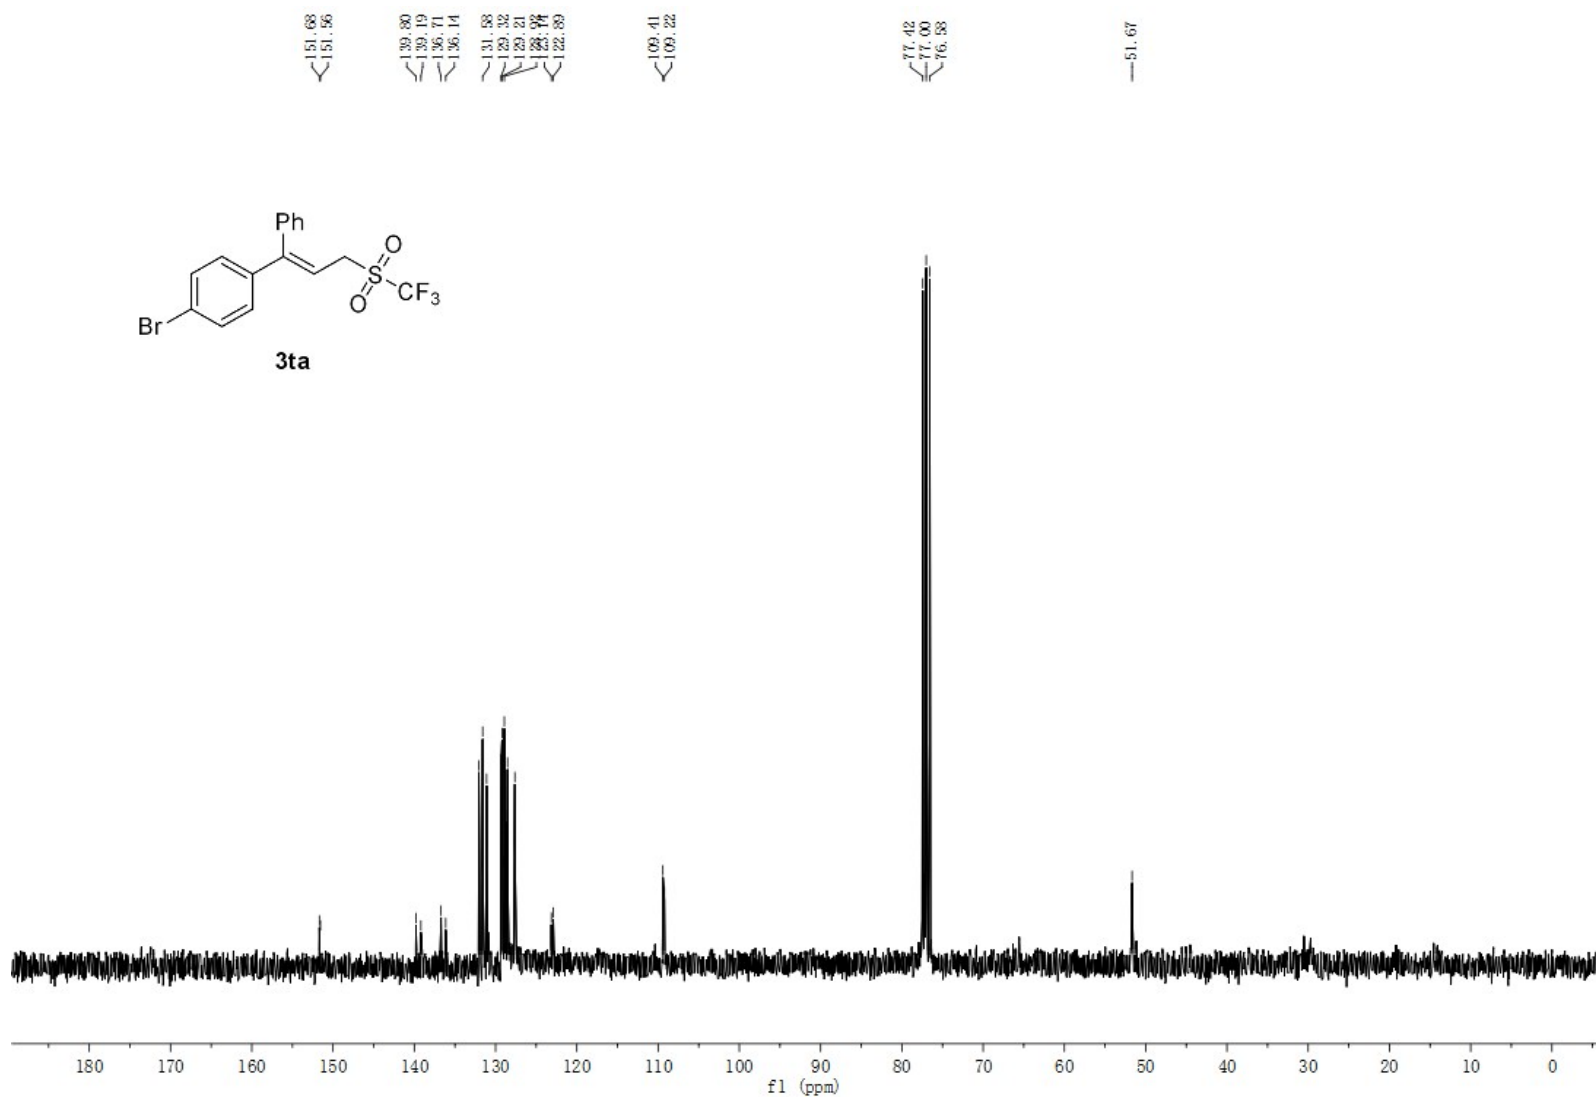

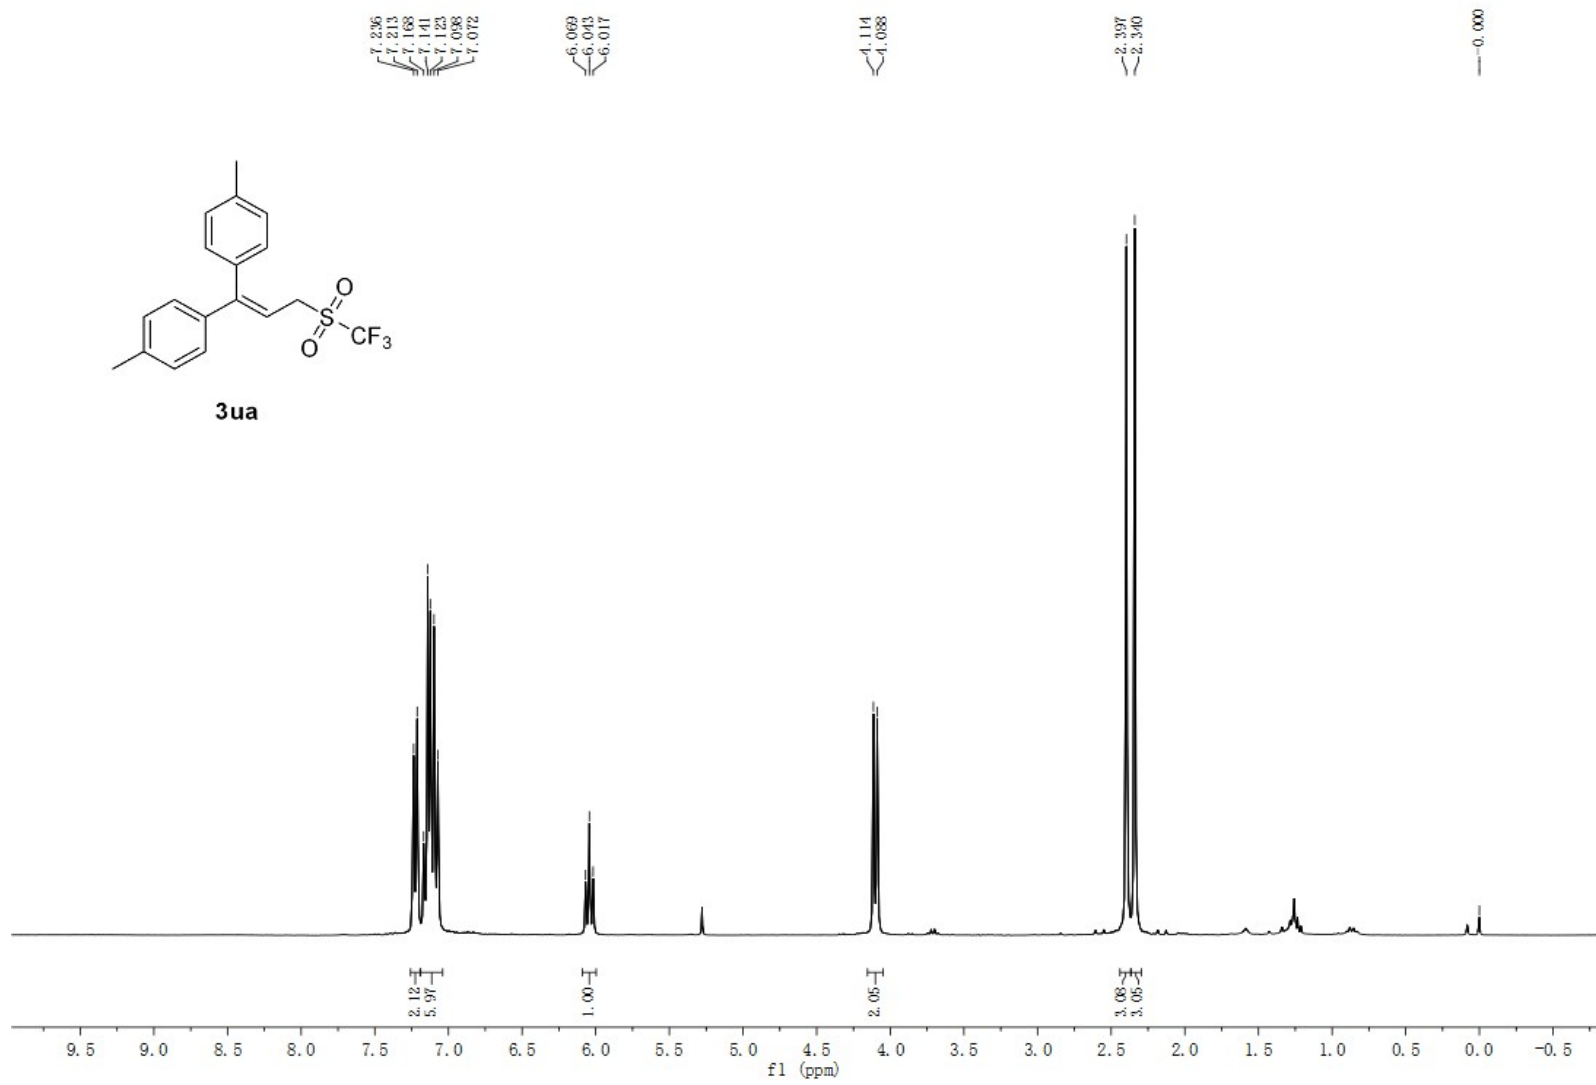

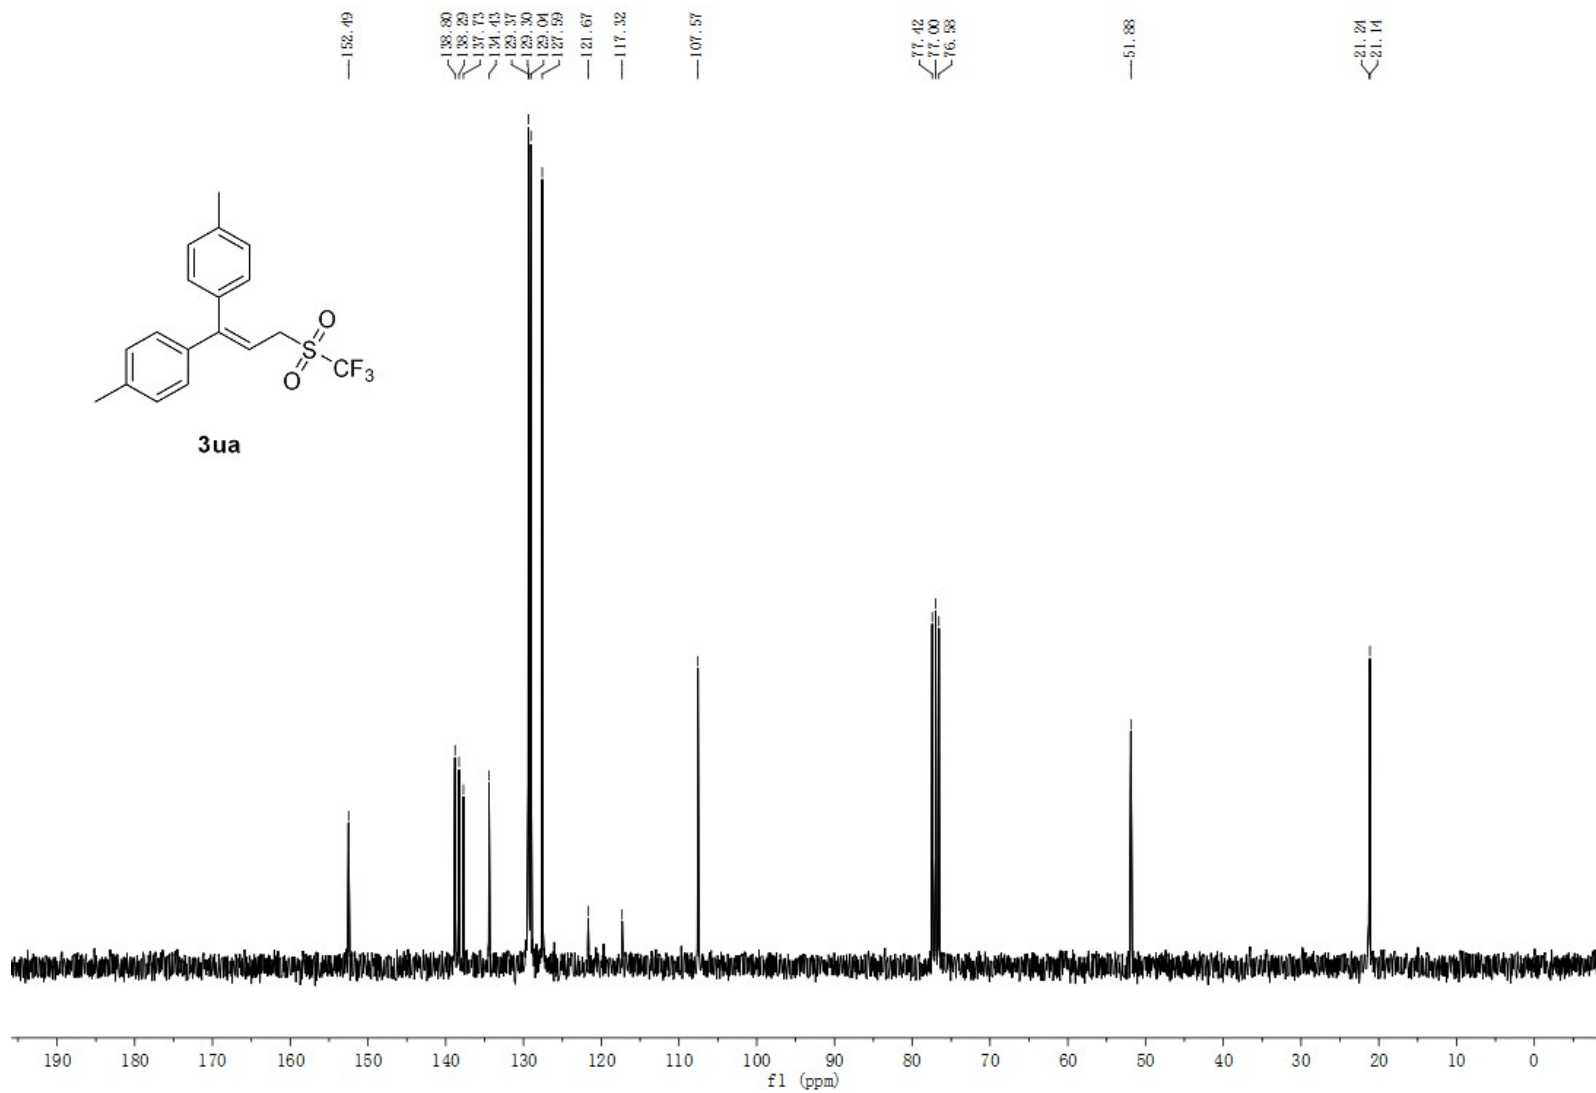



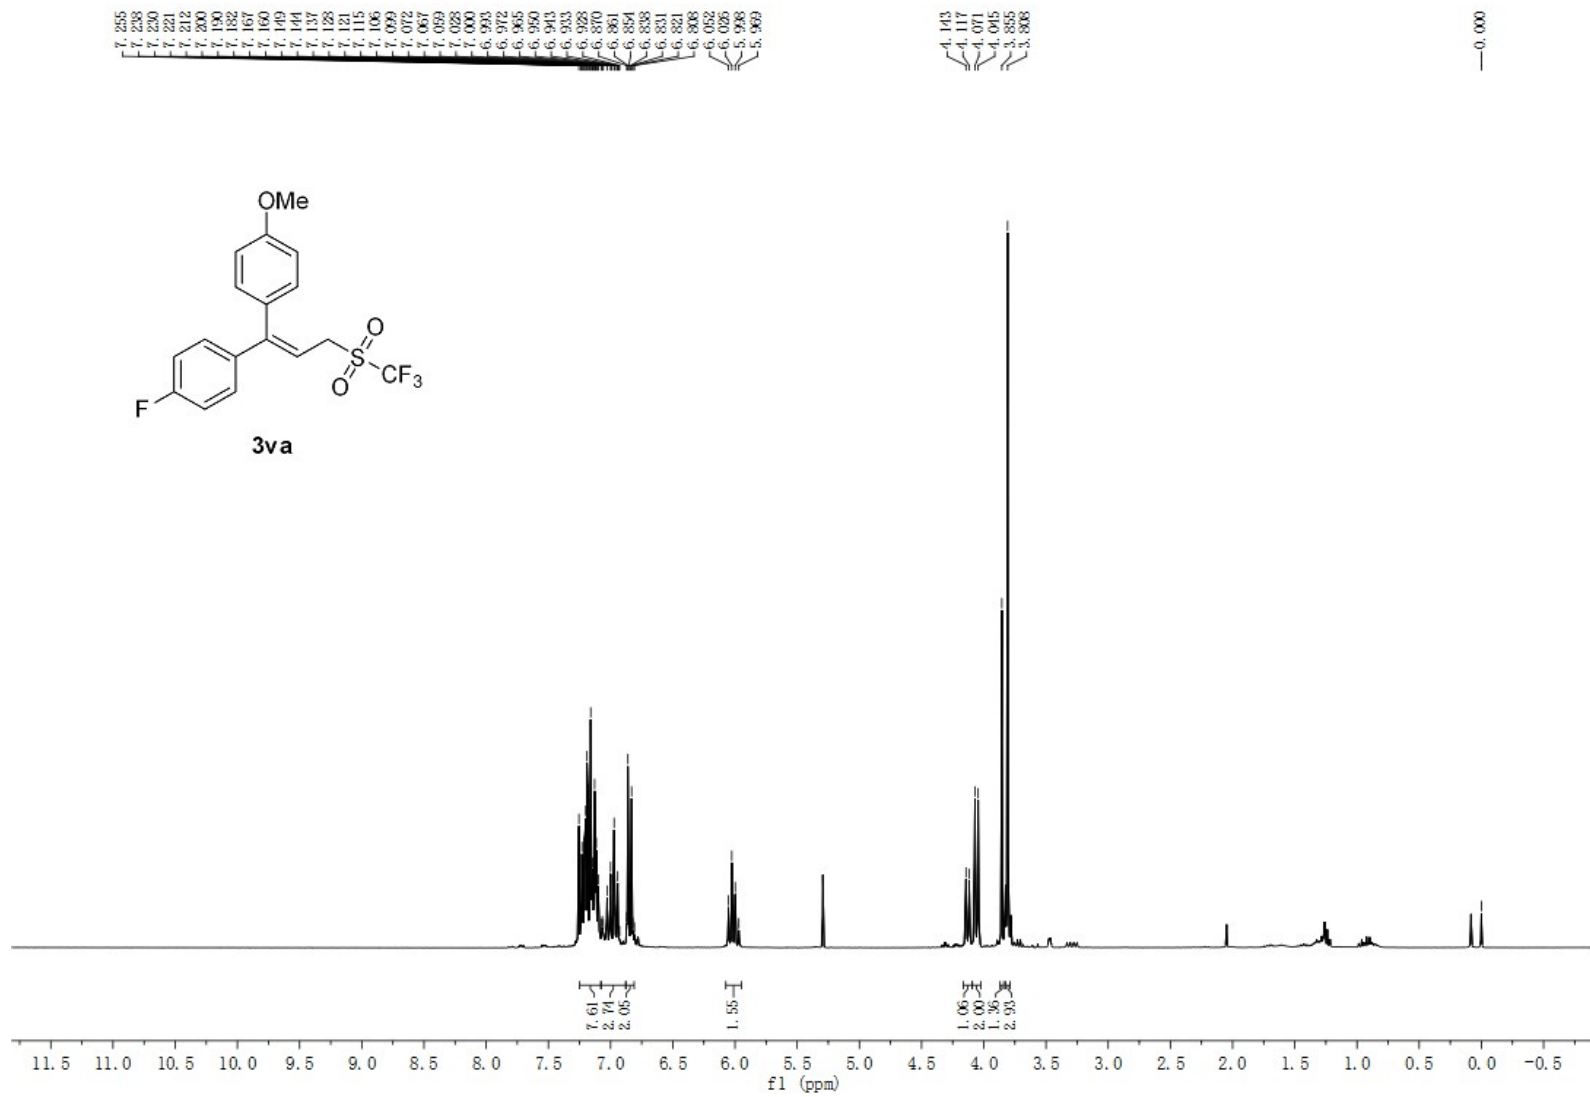

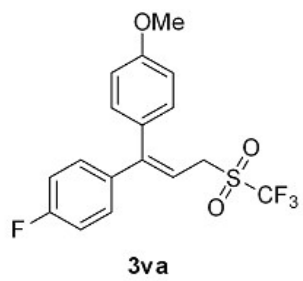

164.64  
 164.26  
 160.97  
 160.20  
 159.74  
 151.39  
 151.25  
 133.40  
 133.35  
 132.67  
 131.31  
 131.20  
 130.70  
 129.59  
 129.48  
 129.20  
 128.93  
 121.66  
 115.96  
 115.67  
 115.44  
 114.16  
 113.77  
 108.18  
 106.92

77.42  
 77.00  
 76.58

55.29  
 51.75

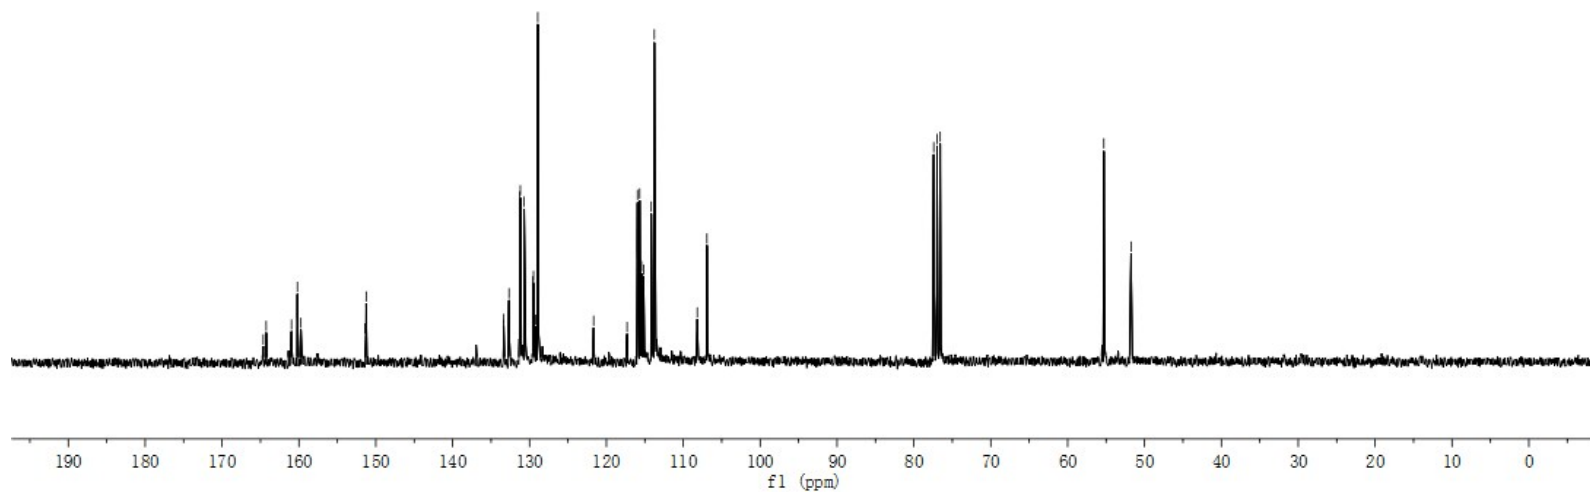

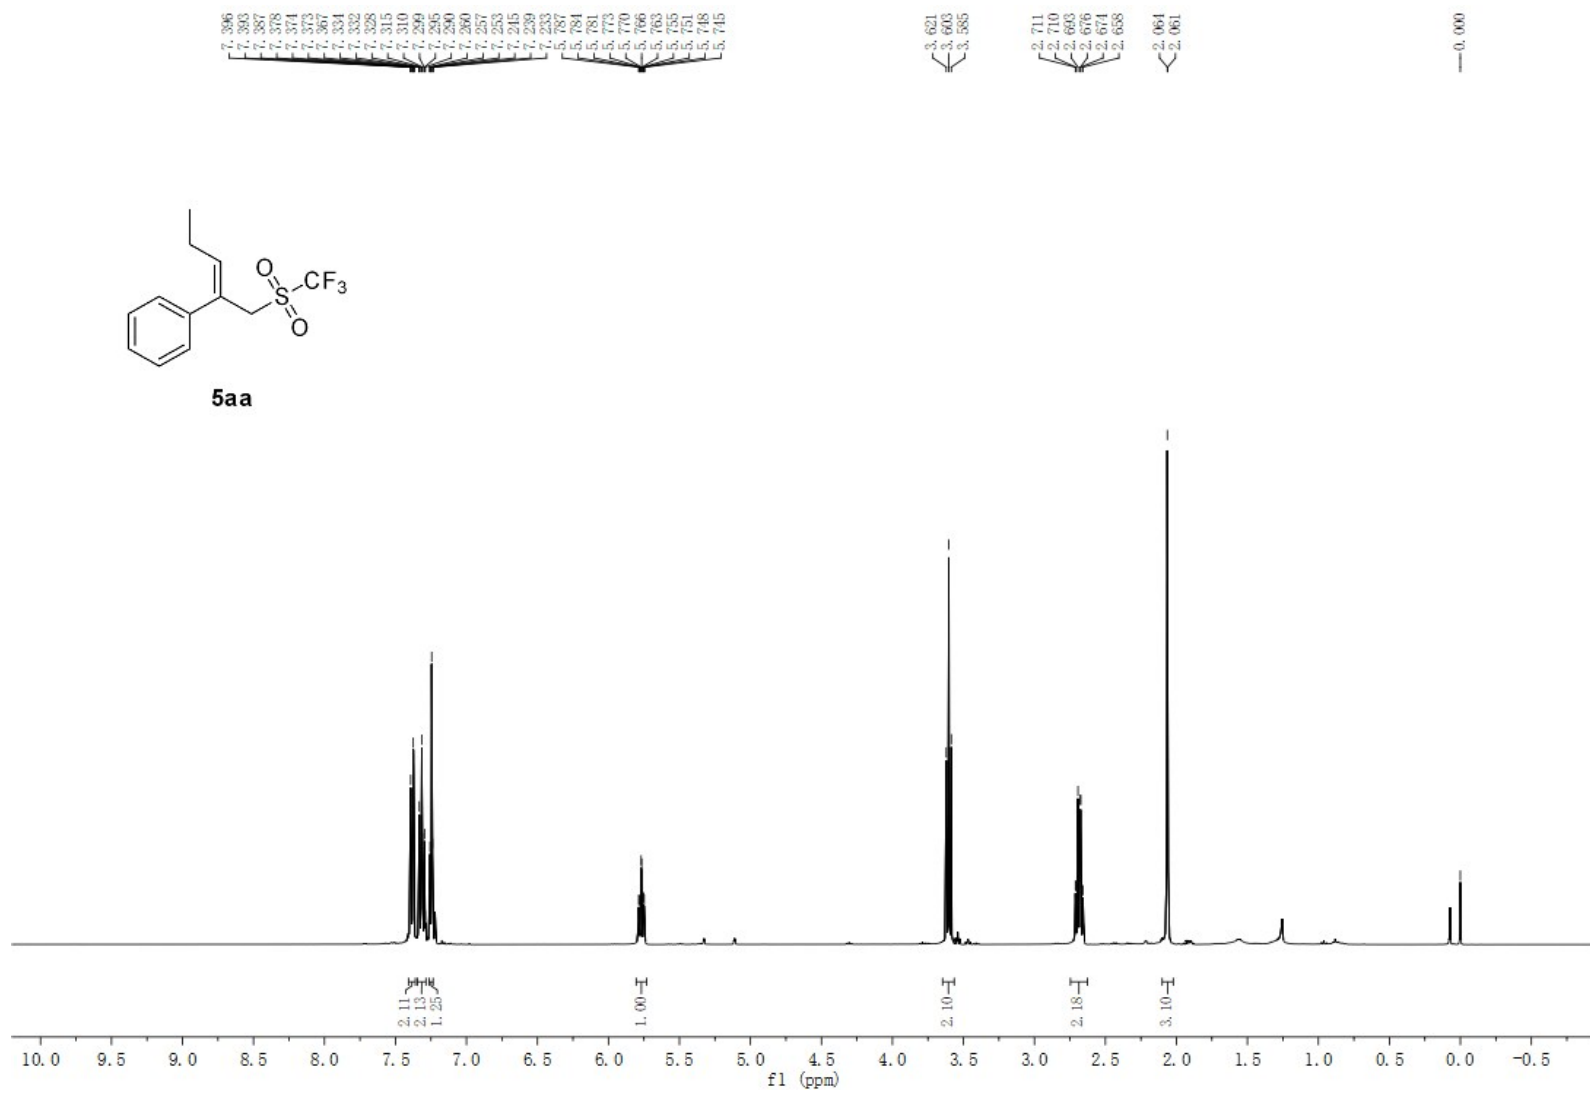

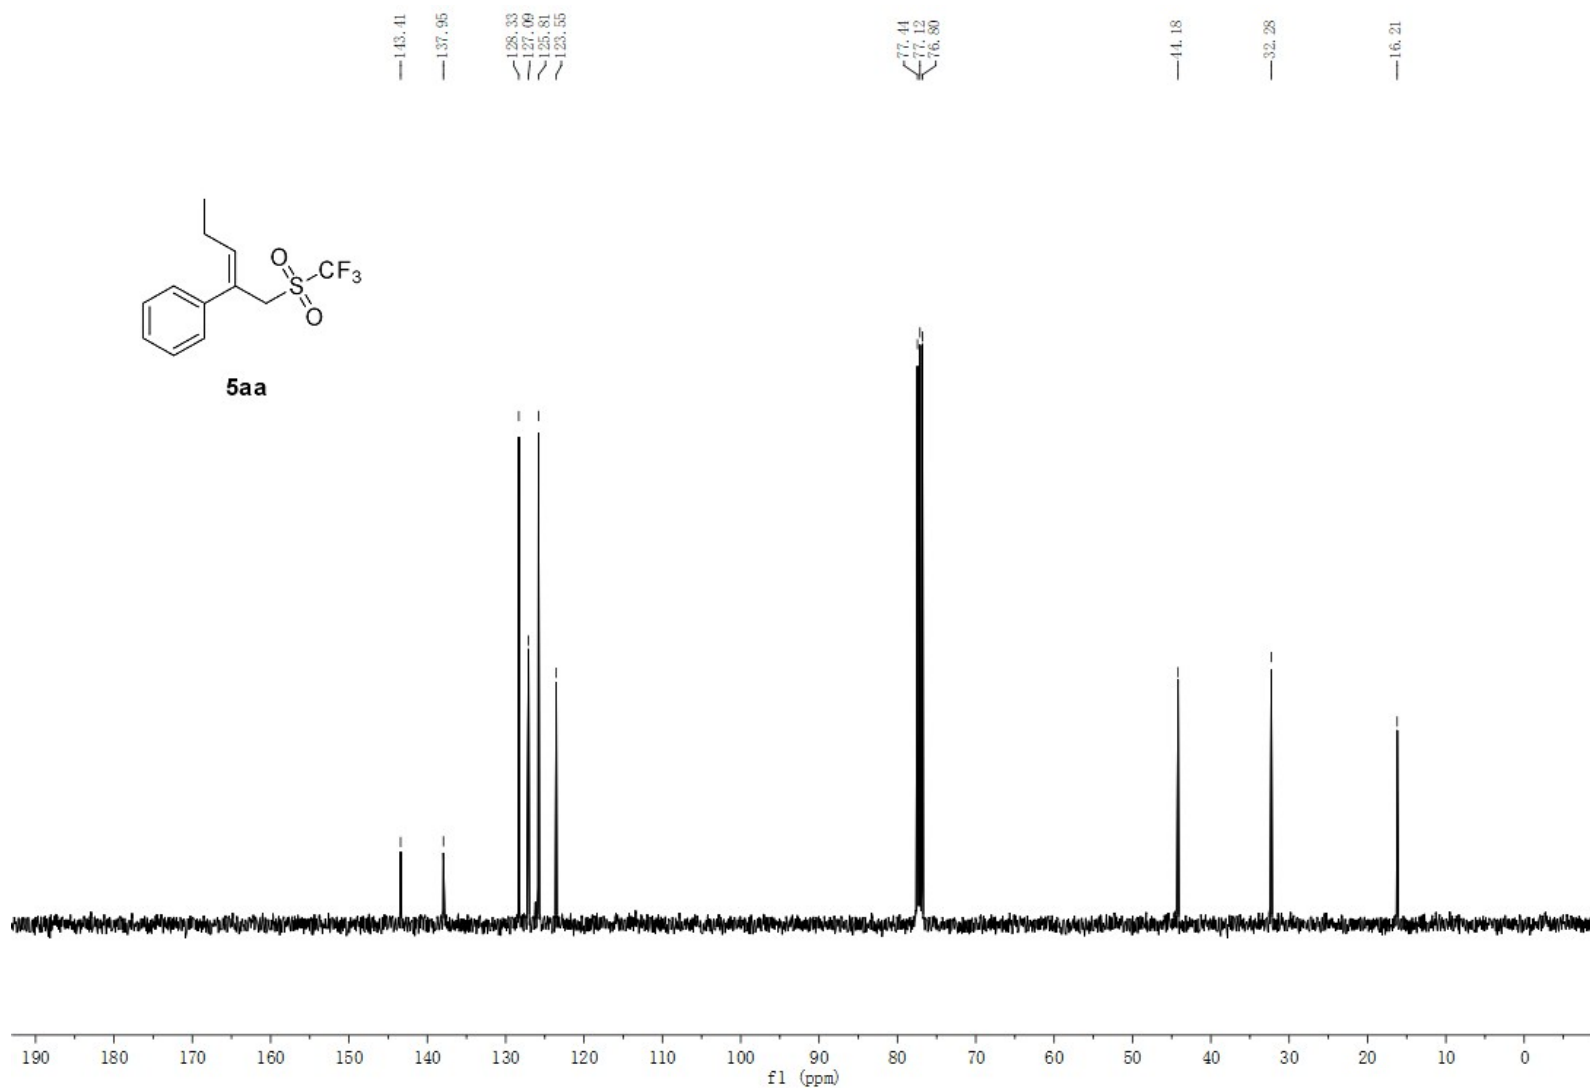

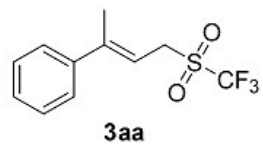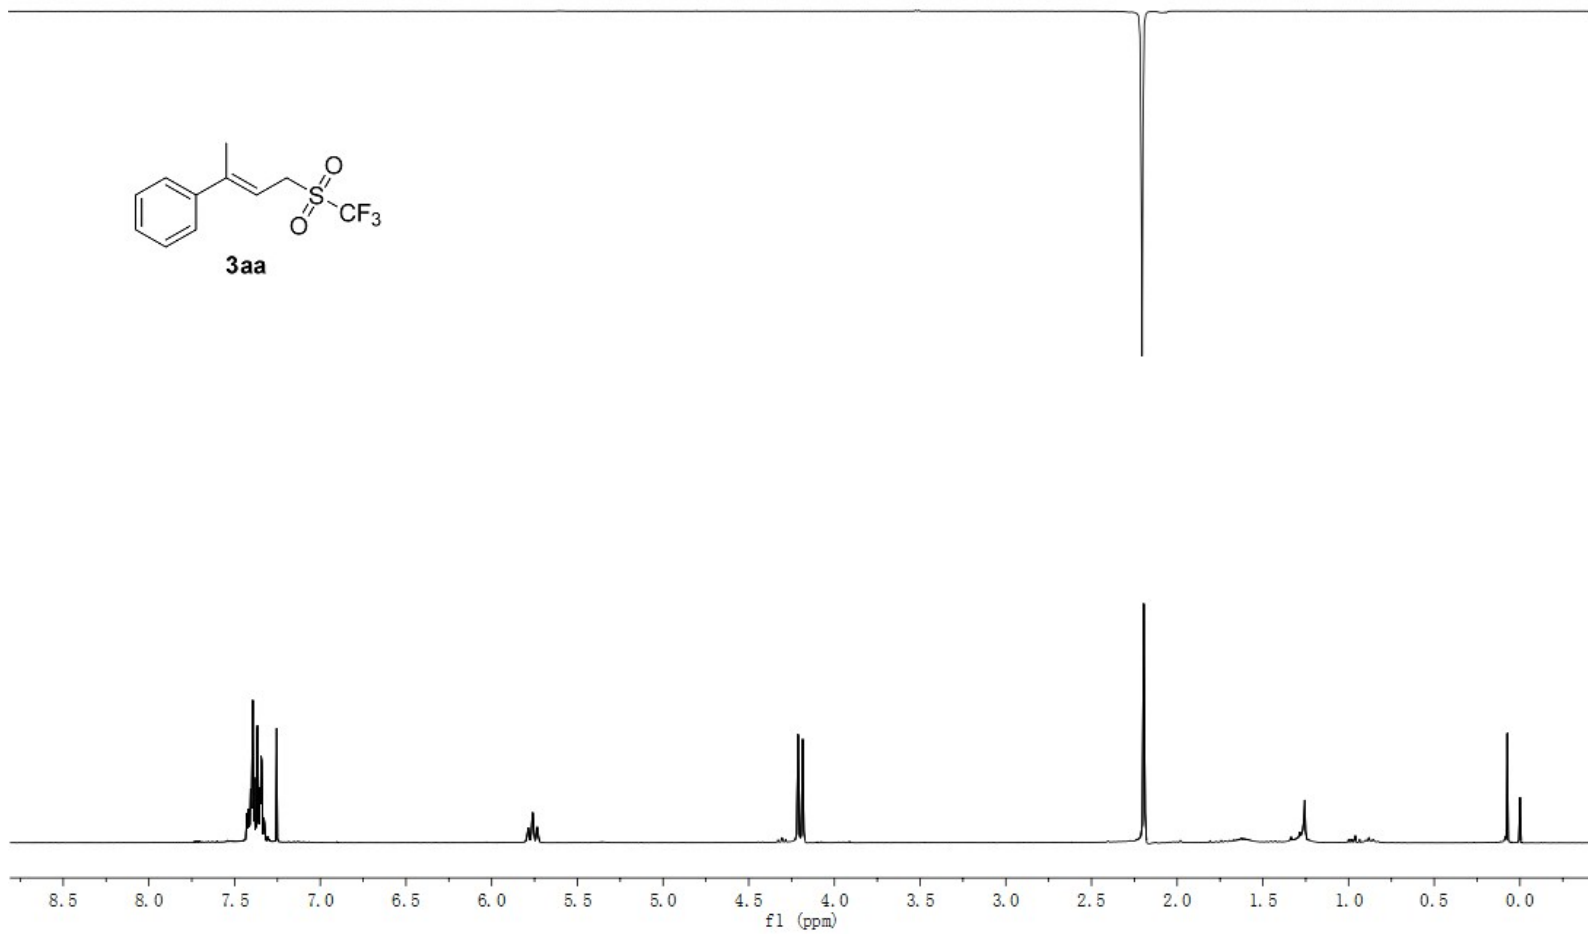

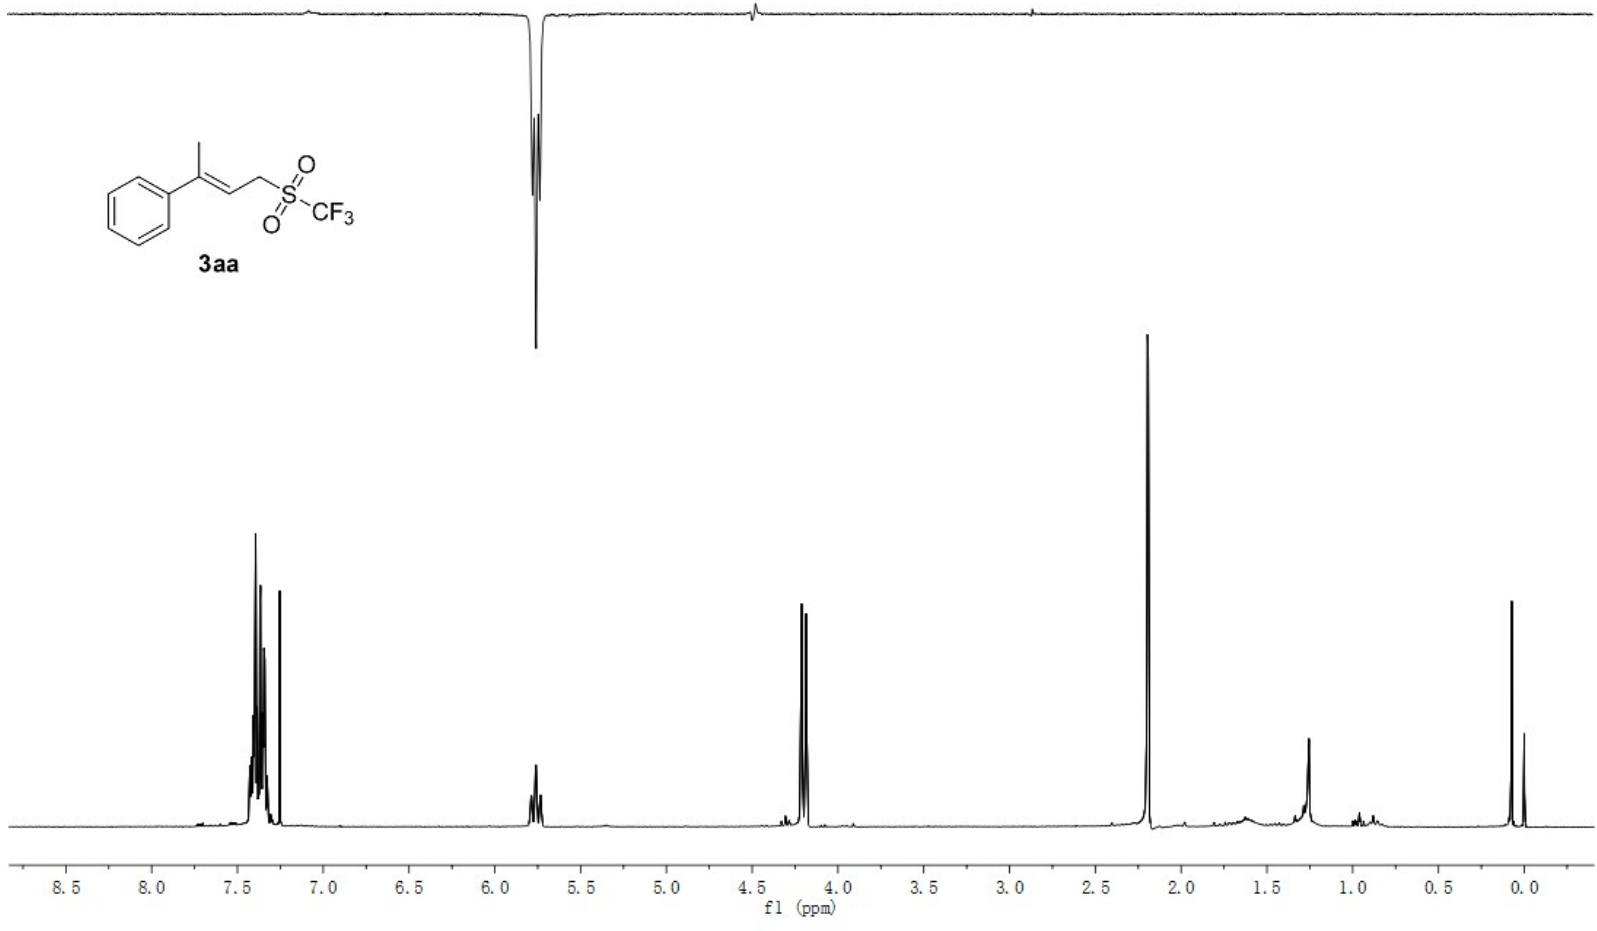

Supplement: c9cc03096d1.pdf [file c9cc03096d1.pdf]
